# Supplementary material for: PPh3-catalyzed synthesis of dicyano-2-methylenebut-3-enoates as efficient dienes in catalytic asymmetric inverse-electron-demand Diels–Alder reaction
Source: Royal Society of Chemistry journal article supplement (doi:10.1039/c1cc12834e), 2011-01-01

## **PPh<sub>3</sub>-Catalyzed Synthesis of Dicyano-2-Methylenebut-3-Enoates as Efficient Dienes in Catalytic Asymmetric Inverse-Electron-Demand Diels-Alder Reaction**

Xianxing Jiang,<sup>a,b</sup> Dan Fu,<sup>a</sup> Xiaomei Shi,<sup>a</sup> Shoulei Wang,<sup>a</sup> and Rui Wang<sup>\*a,b</sup>

<sup>a</sup> *Key Laboratory of Preclinical Study for New Drugs of Gansu Province, State Key Laboratory of Applied Organic Chemistry, Institute of Biochemistry and Molecular Biology, Lanzhou University, Lanzhou, China*

<sup>b</sup> *State Key Laboratory for Oxo Synthesis and Selective Oxidation, Lanzhou Institute of Chemical Physics, Chinese Academy of Sciences, Lanzhou 730000, China.*

**E-mail:** [wangrui@lzu.edu.cn](mailto:wangrui@lzu.edu.cn)

### **Supporting information**

#### Contents

- 1.0 General methods **S2**
- 2.0 General procedure synthesis of dicyano-2-methylenebut-3-enoates **S2**
- 3.0 General procedure for PPh<sub>3</sub>-catalyzed addition/asymmetric IEDDAR sequence **S2**
- 4.0 Characterization data **S3**
- 5.0 References **S20**
- 6.0 X-Ray structure of **5i** **S21**
- 7.0 Copies of HPLC spectra of racemic/chiral products **S22**
- 8.0 Copies of NMR spectra of products **S41**

**1.0 General Methods:** All reactions were carried out under an argon atmosphere condition unless otherwise noted and solvents were dried according to established procedures. Reactions were monitored by thin layer chromatography (TLC), column chromatography purifications were carried out using silica gel GF254. Proton nuclear magnetic resonance ( $^1\text{H}$  NMR) spectra were recorded on Bruker 300 MHz spectrometer in  $\text{CDCl}_3$  unless otherwise noted and carbon nuclear magnetic resonance ( $^{13}\text{C}$  NMR) spectra were recorded on Bruker 300 MHz spectrometer in  $\text{CDCl}_3$  using tetramethylsilane (TMS) as internal standard unless otherwise noted. Data are presented as follows: chemical shift, integration, multiplicity (br = broad, s = singlet, d = doublet, t = triplet, q = quartet, m = multiplet, cm = complex multiplet) and coupling constant in Hertz (Hz). Infrared (IR) spectra were recorded on a FT-IR spectrometer. Optical rotations were recorded on a Perkin-Elmer 341 polarimeter. HR-MS was measured with an APEX II 47e mass spectrometer. Melting points were measured on an XT-4 melting point apparatus and were uncorrected. The ee values determination was carried out using chiral high-performance liquid chromatography (HPLC) with Daicel Chiracel chiral columns on Waters with a 2996 UV-detector and the dr values determined by 300 Hz  $^1\text{H}$  NMR.

**Materials:** The catalysts were synthesized according to the literature procedures.<sup>1</sup>

## 2.0 General procedure for synthesis of dicyano-2-methylenebut-3-enoates

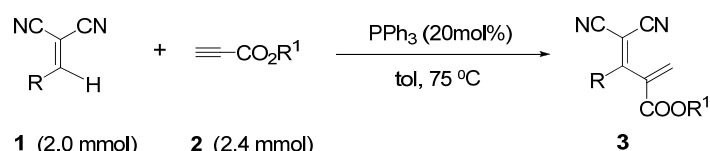

Arylidene malononitrile (2.0 mmol),  $\text{PPh}_3$  (20.0 mol%) were added to toluene (25 mL) in three-necked flask. The mixture was stirred at 75 °C under Argon. To this reaction mixture the solution of alkyl propiolate (2.4 mmol) in toluene (40 mL) was slowly added within 3 hours. Once the addition was finished, the reaction mixture was cooled down to room temperature. Then the mixture was directly subjected to flash column chromatography on silica gel (petroleum ether/ethyl acetate = 15:1) to give the products.

## 3.0 General procedure for the $\text{PPh}_3$ -catalyzed addition/asymmetric IEEDAR sequence

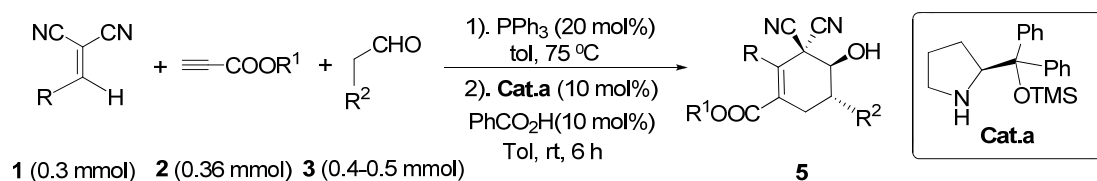

Arylidene malononitrile (0.3 mmol), PPh<sub>3</sub> (20.0 mol%) were added to toluene (3 mL) in three-necked flask. The mixture was stirred at 75 °C under Argon. To this reaction mixture the solution of alkyl propiolate (0.36 mmol) in toluene (6 mL) was slowly added within 1.5 hours. The solution was stirred at room temperature for 1 h, and then was subjected to flash column chromatography on silica gel (petroleum ether/ethyl acetate = 15:1), affording the crude products were directly dissolved in a stirred solution of catalyst (10 mol %), and benzoic acid (10 mol %) in dry toluene (1.2 mL). Then alkyl aldehyde (0.4-0.5 mmol) was added. The solution was stirred at room temperature for a specified reaction time. After the reaction was completed (monitored by TLC), the resulting mixture was concentrated under reduced pressure and the residue was purified through column chromatography on silica gel (petroleum ether/ethyl acetate = 7:1) to give the optical pure products. The enantiomeric purity of the major diastereomer was determined by using HPLC.

#### 4.0 Characterization data

##### Ethyl 4,4-dicyano-3-(4-methoxyphenyl)-2-methylenebut-3-enoate: **3a**

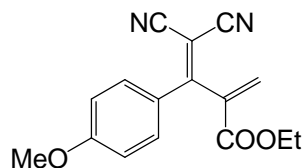

<sup>1</sup>H NMR (300 MHz, CDCl<sub>3</sub>): δ 7.63(d, *J* = 9.0 Hz, 2 H), 6.99(d, *J* = 8.7 Hz, 2 H), 6.88(s, 1 H), 6.14(s, 1 H), 4.13-4.20(dd, *J* = 7.2 Hz, 14.4 Hz, 2 H), 3.88(s, 3 H), 1.16(t, *J* = 7.2 Hz, 3 H); <sup>13</sup>C NMR (75 MHz, CDCl<sub>3</sub>): δ 169.3, 163.6, 163.1, 138.1, 134.5, 131.3, 126.0, 114.6, 113.6, 113.2, 81.9, 62.1, 55.7, 13.9.

IR: ν 2982, 2227, 1725, 1603, 1511, 1462, 1424, 1370, 1308, 1268, 1179, 1025, 838, 812, 665 cm<sup>-1</sup>.

HRMS-ESI (*m/z*): calcd for C<sub>16</sub>H<sub>14</sub>N<sub>2</sub>O<sub>3</sub>+NH<sub>4</sub><sup>+</sup>:300.1343; found: 300.1341, 0.7ppm.

##### Ethyl 4,4-dicyano-2-methylene-3-phenylbut-3-enoate: **3b**

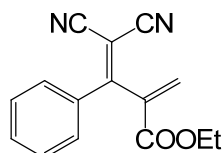

<sup>1</sup>H NMR (300 MHz, CDCl<sub>3</sub>): δ 7.47-7.58(m, 5 H), 6.88(s, 1 H), 6.18(s, 1 H), 4.09-4.16(dd, *J* = 7.2 Hz, 14.1 Hz, 2 H), 1.10(t, *J* = 6.9 Hz, 3 H); <sup>13</sup>C NMR (75 MHz, CDCl<sub>3</sub>): δ 170.6, 162.9, 137.9, 134.9, 133.9, 132.9, 129.1, 128.8, 112.8, 112.7, 85.0, 62.1, 13.8.

**IR:**  $\nu$  2986, 2231, 1733, 1556, 1470, 1371, 1257, 1185, 1022, 911, 863, 810, 776, 701, 589  $\text{cm}^{-1}$ .

**HRMS-ESI ( $m/z$ ):** calcd for  $\text{C}_{15}\text{H}_{12}\text{N}_2\text{O}_2+\text{NH}_4^+$ :270.1237; found: 270.1231, 2.2ppm.

**Ethyl 4,4-dicyano-2-methylene-3-(naphthalen-1-yl)but-3-enoate: 3c**

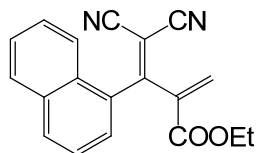

**$^1\text{H}$  NMR** (300 MHz,  $\text{CDCl}_3$ ):  $\delta$  8.02(d,  $J = 8.1$  Hz, 1 H), 7.90-7.93(m, 1 H), 7.79-7.82(m, 1 H), 7.47-7.60(m, 4 H), 6.74(s, 1 H), 6.05(s, 1 H), 4.22-4.29(dd,  $J = 7.2$  Hz, 14.4 Hz, 2 H), 1.19(t,  $J = 6.9$  Hz, 3 H);  **$^{13}\text{C}$  NMR** (75 MHz,  $\text{CDCl}_3$ ):  $\delta$  170.3, 163.3, 139.0, 135.4, 133.8, 132.4, 132.3, 129.8, 128.9, 127.8, 127.7, 127.0, 124.8, 112.1, 112.0, 89.1, 62.4, 13.9.

**IR:**  $\nu$  2985, 2231, 1727, 1556, 1509, 1467, 1370, 1343, 1248, 1159, 1091, 1021, 864, 777, 738  $\text{cm}^{-1}$ .

**HRMS-ESI ( $m/z$ ):** calcd for  $\text{C}_{19}\text{H}_{14}\text{N}_2\text{O}_2+\text{NH}_4^+$ :320.1394; found: 320.1401, 2.2ppm.

**Ethyl 4,4-dicyano-2-methylene-3-p-tolylbut-3-enoate: 3d**

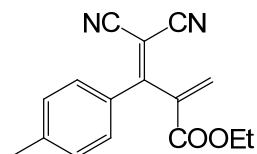

**$^1\text{H}$  NMR** (300 MHz,  $\text{CDCl}_3$ ):  $\delta$  7.50(d,  $J = 8.4$  Hz, 2 H), 7.30(d,  $J = 8.1$  Hz, 2 H), 6.89(s, 1 H), 6.17(s, 1 H), 4.12-4.19(dd,  $J = 7.2$  Hz, 14.1 Hz, 2 H), 2.42(s, 3 H), 1.14(t,  $J = 7.2$  Hz, 3 H);  **$^{13}\text{C}$  NMR** (75 MHz,  $\text{CDCl}_3$ ):  $\delta$  170.4, 163.1, 144.2, 138.0, 134.7, 130.4, 129.9, 128.9, 113.1, 112.9, 83.9, 62.1, 21.7, 13.8.

**IR:**  $\nu$  2985, 2228, 1729, 1608, 1550, 1448, 1410, 1258, 1184, 1022, 863, 820, 743, 666, 612  $\text{cm}^{-1}$ .

**HRMS-ESI ( $m/z$ ):** calcd for  $\text{C}_{16}\text{H}_{14}\text{N}_2\text{O}_2+\text{NH}_4^+$ :284.1394; found: 284.1401, 2.5ppm.

**Ethyl 4,4-dicyano-3-(3-methoxyphenyl)-2-methylenebut-3-enoate: 3e**

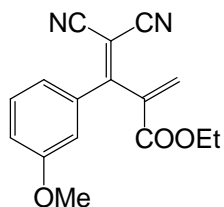

**$^1\text{H}$  NMR** (300 MHz,  $\text{CDCl}_3$ ):  $\delta$  7.36-7.42(m, 1 H), 7.08-7.13(m, 3 H), 6.88(s, 1 H), 6.18(s, 1 H), 4.12-4.19(dd,  $J = 7.2$  Hz, 14.1 Hz, 2 H), 3.84(s, 3 H), 1.14(t,  $J = 7.2$  Hz, 3 H);  **$^{13}\text{C}$  NMR** (75 MHz,  $\text{CDCl}_3$ ):  $\delta$  170.4, 162.9, 159.8, 137.9, 135.0, 134.7, 130.3, 121.2, 118.8, 113.8, 112.8, 112.6, 85.1,

62.1, 55.6, 13.8.

**IR:**  $\nu$  2983, 2230, 1728, 1561, 1428, 1329, 1268, 1235, 1183, 1095, 1020, 865, 791, 704, 562  $\text{cm}^{-1}$ .

**HRMS-ESI** ( $m/z$ ): calcd for  $\text{C}_{16}\text{H}_{14}\text{N}_2\text{O}_3+\text{NH}_4^+$ :300.1343; found: 300.1347, 1.3ppm.

**Ethyl 4,4-dicyano-2-methylene-3-m-tolylbut-3-enoate: 3f**

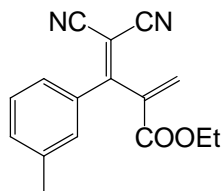

**$^1\text{H}$  NMR** (300 MHz,  $\text{CDCl}_3$ ):  $\delta$  7.35-7.37(m, 4 H), 6.88(s, 1 H), 6.17(s, 1 H), 4.12-4.19(dd,  $J$  = 7.2 Hz, 14.4 Hz, 2 H), 2.40(s, 3 H), 1.13(t,  $J$  = 7.2 Hz, 3 H);  **$^{13}\text{C}$  NMR** (75 MHz,  $\text{CDCl}_3$ ):  $\delta$  170.8, 163.0, 139.1, 138.0, 134.6, 133.9, 133.7, 129.2, 129.0, 126.0, 112.8, 112.7, 84.8, 62.1, 21.3, 13.8.

**IR:**  $\nu$  2985, 2230, 1730, 1559, 1449, 1371, 1262, 1216, 1183, 1098, 1021, 864, 793, 706, 592  $\text{cm}^{-1}$ .

**HRMS-ESI** ( $m/z$ ): calcd for  $\text{C}_{16}\text{H}_{14}\text{N}_2\text{O}_2+\text{NH}_4^+$ :284.1394; found: 284.1388, 2.1ppm.

**Ethyl 4,4-dicyano-2-methylene-3-o-tolylbut-3-enoate: 3g**

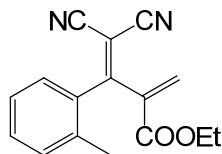

**$^1\text{H}$  NMR** (300 MHz,  $\text{CDCl}_3$ ):  $\delta$  7.18-7.43(m, 4 H), 6.76(s, 1 H), 6.04(s, 1 H), 4.21-4.28(dd,  $J$  = 7.2 Hz, 14.4 Hz, 2 H), 2.35(s, 3 H), 1.25(t,  $J$  = 7.2 Hz, 3 H);  **$^{13}\text{C}$  NMR** (75 MHz,  $\text{CDCl}_3$ ):  $\delta$  171.4, 163.1, 138.5, 136.3, 135.3, 134.3, 131.5, 131.4, 128.6, 126.2, 112.2, 111.9, 88.6, 62.3, 19.8, 13.9.

**IR:**  $\nu$  2985, 2232, 1729, 1560, 1454, 1391, 1252, 1158, 1115, 1022, 863, 767, 676, 593  $\text{cm}^{-1}$ .

**HRMS-ESI** ( $m/z$ ): calcd for  $\text{C}_{16}\text{H}_{14}\text{N}_2\text{O}_2+\text{NH}_4^+$ :284.1394; found: 284.1400, 2.1ppm.

**Ethyl 3-(4-bromophenyl)-4,4-dicyano-2-methylenebut-3-enoate: 3h**

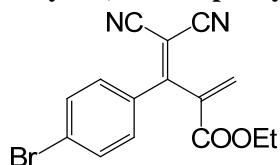

**$^1\text{H}$  NMR** (300 MHz,  $\text{CDCl}_3$ ):  $\delta$  7.65(d,  $J$  = 8.7 Hz, 2 H), 7.45(d,  $J$  = 8.7 Hz, 2 H), 6.91 (s, 1 H), 6.22(s, 1 H), 4.12-4.19(dd,  $J$  = 7.2 Hz, 14.1 Hz, 2 H), 1.15(t,  $J$  = 7.2 Hz, 3 H);  **$^{13}\text{C}$  NMR** (75 MHz,  $\text{CDCl}_3$ ):  $\delta$  169.3, 162.7, 137.5, 135.3, 132.7, 132.5, 130.2, 127.9, 112.5, 112.4, 85.5, 62.3, 13.8.

**IR:**  $\nu$  2924, 2854, 2231, 1729, 1582, 1485, 1401, 1331, 1253, 1184, 1074, 1014, 904, 830, 729  $\text{cm}^{-1}$ .

**HRMS-ESI** ( $m/z$ ): calcd for  $\text{C}_{15}\text{H}_{11}\text{BrN}_2\text{O}_2+\text{NH}_4^+$ :348.0342; found: 348.0339, 0.9ppm.

**Ethyl 3-(4-chlorophenyl)-4,4-dicyano-2-methylenebut-3-enoate: 3i**

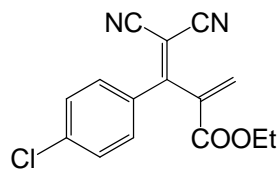

**$^1\text{H NMR}$**  (300 MHz,  $\text{CDCl}_3$ ):  $\delta$  7.45-7.54(dd,  $J = 8.7$  Hz, 18.0 Hz, 4 H), 6.90(s, 1 H), 6.22(s, 1 H), 4.12-4.19(dd,  $J = 7.2$  Hz, 14.1 Hz, 2 H), 1.15(t,  $J = 7.2$  Hz, 3 H);  **$^{13}\text{C NMR}$**  (75 MHz,  $\text{CDCl}_3$ ):  $\delta$  169.1, 162.7, 139.3, 137.6, 135.2, 132.3, 130.1, 129.5, 112.6, 112.4, 85.5, 62.2, 13.8.

**IR:**  $\nu$  2985, 2231, 1729, 1590, 1490, 1404, 1254, 1184, 1096, 1018, 910, 834, 736, 650, 585  $\text{cm}^{-1}$ .

**HRMS-ESI** ( $m/z$ ): calcd for  $\text{C}_{15}\text{H}_{11}\text{ClN}_2\text{O}_2+\text{NH}_4^+$ :304.0847; found: 304.0841, 2.0ppm.

**Ethyl 4,4-dicyano-3-(4-fluorophenyl)-2-methylenebut-3-enoate: 3j**

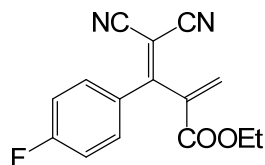

**$^1\text{H NMR}$**  (300 MHz,  $\text{CDCl}_3$ ):  $\delta$  7.58-7.63(m, 2 H), 7.16-7.22(m, 2 H), 6.91(s, 1 H), 6.21(s, 1 H), 4.13-4.20(dd,  $J = 7.2$  Hz, 14.4 Hz, 2 H), 1.15(t,  $J = 6.9$  Hz, 3 H);  **$^{13}\text{C NMR}$**  (75 MHz,  $\text{CDCl}_3$ ):  $\delta$  169.2, 166.9, 163.5, 162.8, 158.4, 137.8, 135.0, 133.5, 133.4, 131.4, 131.3, 130.0, 117.4, 117.1, 116.8, 116.5, 112.7, 112.5, 85.0, 62.2, 13.8.

**IR:**  $\nu$  2986, 2231, 1729, 1599, 15081, 1472, 1410, 1245, 1163, 1106, 1020, 843, 749, 668, 528  $\text{cm}^{-1}$ .

**HRMS-ESI** ( $m/z$ ): calcd for  $\text{C}_{15}\text{H}_{11}\text{FN}_2\text{O}_2+\text{NH}_4^+$ :288.1143; found: 288.1148, 1.7ppm.

**Ethyl 4,4-dicyano-2-methylene-3-(4-(trifluoromethyl)phenyl)but-3-enoate: 3k**

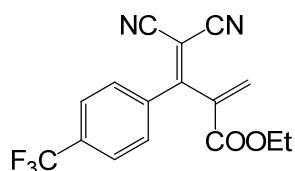

**$^1\text{H NMR}$**  (300 MHz,  $\text{CDCl}_3$ ):  $\delta$  7.78 (d,  $J = 8.1$  Hz, 2 H), 7.68 (d,  $J = 8.4$  Hz, 2 H), 6.95 (s, 1 H), 6.27 (s, 1 H), 4.13-4.20 (dd,  $J = 7.2$  Hz, 14.4 Hz, 2 H), 1.14 (t,  $J = 7.2$  Hz, 3 H);  **$^{13}\text{C NMR}$**  (75 MHz,  $\text{CDCl}_3$ ):  $\delta$  169.0, 162.5, 137.4, 137.2, 135.4, 129.0, 126.2, 126.1, 112.0, 111.9, 87.3, 62.4,

13.8.

**IR:**  $\nu$  2988, 2234, 1732, 1564, 1449, 1410, 1326, 1257, 1132, 1069, 1019, 845, 698, 645, 599  $\text{cm}^{-1}$ .

**HRMS-ESI** ( $m/z$ ): calcd for  $\text{C}_{16}\text{H}_{11}\text{F}_3\text{N}_2\text{O}_2+\text{NH}_4^+$ :338.1111; found: 338.1103, 2.4ppm.

**Ethyl 3-(3-bromophenyl)-4,4-dicyano-2-methylenebut-3-enoate: 3l**

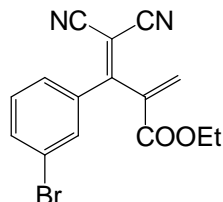

**$^1\text{H}$  NMR** (300 MHz,  $\text{CDCl}_3$ ):  $\delta$  7.35-7.72(m, 4 H), 6.92(s, 1 H), 6.23(s, 1 H), 4.13-4.20(dd,  $J$  = 7.2 Hz, 14.1 Hz, 2 H), 1.16(t,  $J$  = 6.9 Hz, 3 H);  **$^{13}\text{C}$  NMR** (75 MHz,  $\text{CDCl}_3$ ):  $\delta$  168.9, 162.6, 137.4, 135.7, 135.6, 135.4, 131.3, 130.7, 127.3, 123.2, 112.2, 112.1, 86.5, 62.3, 13.8.

**IR:**  $\nu$  2924, 2853, 2232, 1729, 1559, 1470, 1407, 1249, 1183, 1075, 1021, 883, 792, 735, 688  $\text{cm}^{-1}$ .

**HRMS-ESI** ( $m/z$ ): calcd for  $\text{C}_{15}\text{H}_{11}\text{BrN}_2\text{O}_2+\text{NH}_4^+$ :348.0342; found: 348.0336, 2.1ppm.

**Ethyl 3-(3-chlorophenyl)-4,4-dicyano-2-methylenebut-3-enoate: 3m**

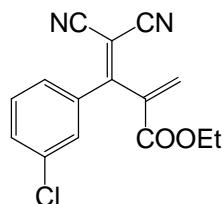

**$^1\text{H}$  NMR** (300 MHz,  $\text{CDCl}_3$ ):  $\delta$  7.42-7.55(m, 4 H), 6.92(s, 1 H), 6.22(s, 1 H), 4.13-4.20(dd,  $J$  = 7.2 Hz, 14.4 Hz, 2 H), 1.15(t,  $J$  = 7.2 Hz, 3 H);  **$^{13}\text{C}$  NMR** (75 MHz,  $\text{CDCl}_3$ ):  $\delta$  169.0, 162.6, 137.4, 135.5, 135.3, 132.6, 130.5, 128.5, 126.9, 112.2, 86.5, 62.3, 13.8.

**IR:**  $\nu$  2926, 2232, 1730, 1560, 1472, 1411, 1250, 1184, 1100, 1021, 883, 794, 752, 692, 593  $\text{cm}^{-1}$ .

**HRMS-ESI** ( $m/z$ ): calcd for  $\text{C}_{15}\text{H}_{11}\text{ClN}_2\text{O}_2+\text{NH}_4^+$ :304.0847; found: 304.0854, 2.3ppm.

**Ethyl 4,4-dicyano-3-(2-fluorophenyl)-2-methylenebut-3-enoate: 3n**

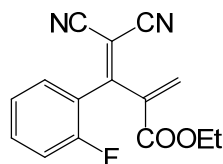

**$^1\text{H}$  NMR** (300 MHz,  $\text{CDCl}_3$ ):  $\delta$  7.51-7.58(m, 1 H), 7.33-7.39(ddd,  $J$  = 1.8 Hz, 7.5 Hz, 1 H), 7.18-7.29(m, 2 H), 6.86(s, 1 H), 6.22(s, 1 H), 4.15-4.22(dd,  $J$  = 7.2 Hz, 14.4 Hz, 2 H), 1.17(t,  $J$  = 7.2 Hz, 3 H);  **$^{13}\text{C}$  NMR** (75 MHz,  $\text{CDCl}_3$ ):  $\delta$  165.4, 162.5, 160.9, 157.5, 137.5, 134.9, 134.3,

130.0, 124.7, 122.7, 117.0, 116.7, 111.8, 89.1, 62.2, 13.8.

**IR:**  $\nu$  2924, 2234, 1730, 1612, 1581, 1450, 1371, 1254, 1184, 1108, 1021, 911, 811, 766, 675  $\text{cm}^{-1}$ .

**HRMS-ESI** ( $m/z$ ): calcd for  $\text{C}_{15}\text{H}_{11}\text{FN}_2\text{O}_2+\text{Na}^+$ :293.0697; found: 293.0700, 1.0ppm.

**Ethyl 4,4-dicyano-3-(furan-2-yl)-2-methylenebut-3-enoate: 3o**

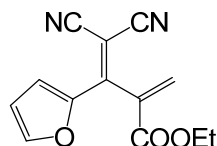

**$^1\text{H}$  NMR** (300 MHz,  $\text{CDCl}_3$ ):  $\delta$  7.79 (d,  $J = 1.5$  Hz, 1 H), 7.25 (d,  $J = 3.6$  Hz, 1 H), 6.89(s, 1 H), 6.69-6.70(q,  $J = 1.5$  Hz, 1 H), 6.12(s, 1 H), 4.24-4.31(dd,  $J = 7.2$  Hz, 14.1 Hz, 2 H), 1.27(t,  $J = 7.2$  Hz, 3 H);  **$^{13}\text{C}$  NMR** (75 MHz,  $\text{CDCl}_3$ ):  $\delta$  162.8, 153.0, 149.1, 148.7, 134.9, 134.3, 122.6, 114.3, 113.1, 113.0, 78.2, 62.3, 14.0.

**IR:**  $\nu$  3134, 2985, 2227, 1726, 1570, 1457, 1395, 1266, 1182, 1091, 1032, 852, 769, 668, 586  $\text{cm}^{-1}$ .

**HRMS-ESI** ( $m/z$ ): calcd for  $\text{C}_{13}\text{H}_{10}\text{N}_2\text{O}_3+\text{NH}_4^+$ :260.1030; found:260.1034, 1.5ppm.

**Ethyl 4,4-dicyano-2-methylene-3-(thiophen-2-yl)but-3-enoate: 3p**

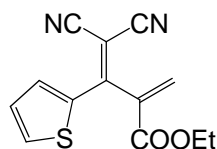

**$^1\text{H}$  NMR** (300 MHz,  $\text{CDCl}_3$ ):  $\delta$  7.85-7.91(m, 2 H), 7.26-7.29(m, 1 H), 6.90(s, 1 H), 6.13(s, 1 H), 4.23-4.30(dd,  $J = 7.2$  Hz, 14.4 Hz, 2 H), 1.25(t,  $J = 6.9$  Hz, 3 H);  **$^{13}\text{C}$  NMR** (75 MHz,  $\text{CDCl}_3$ ):  $\delta$  162.8, 151.5, 138.7, 137.4, 136.4, 135.7, 134.1, 129.5, 113.6, 113.1, 79.3, 62.3, 14.0.

**IR:**  $\nu$  3108, 2985, 2225, 1725, 1537, 1410, 1322, 1257, 1156, 1064, 1021, 861, 730, 611, 570  $\text{cm}^{-1}$ .

**HRMS-ESI** ( $m/z$ ): calcd for  $\text{C}_{13}\text{H}_{10}\text{N}_2\text{O}_2\text{S}+\text{NH}_4^+$ :276.0801; found: 276.0802, 0.4ppm.

**Methyl 4,4-dicyano-3-(4-methoxyphenyl)-2-methylenebut-3-enoate: 3q**

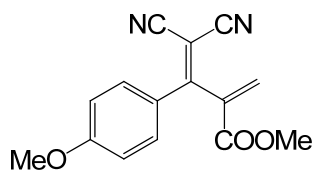

**$^1\text{H}$  NMR** (300 MHz,  $\text{CDCl}_3$ ):  $\delta$  7.64(d,  $J = 9.0$  Hz, 2 H), 6.99(d,  $J = 9.0$  Hz, 2 H), 6.89(s, 1 H),



6.13 (s, 1 H), 3.88(s, 3 H), 3.74(s, 3 H);  $^{13}\text{C NMR}$  (75 MHz,  $\text{CDCl}_3$ ):  $\delta$  169.0, 163.7, 137.8, 134.8, 131.4, 125.9, 115.1, 114.7, 113.5, 113.2, 82.1, 55.7, 53.0.

**IR:**  $\nu$  2955, 2219, 1730, 1604, 1512, 1436, 1258, 1180, 1122, 1028, 837, 784, 740, 664  $\text{cm}^{-1}$ .

**HRMS-ESI** ( $m/z$ ): calcd for  $\text{C}_{15}\text{H}_{12}\text{N}_2\text{O}_3+\text{Na}^+$ :291.0740; found: 291.0737, 1.0ppm.

**Methyl 3-(4-bromophenyl)-4,4-dicyano-2-methylenebut-3-enoate: 3r**

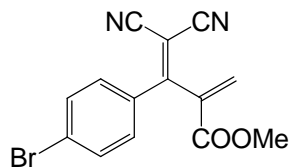

$^1\text{H NMR}$  (300 MHz,  $\text{CDCl}_3$ ):  $\delta$  7.66(d,  $J$  = 8.7Hz, 2 H), 7.46(d,  $J$  = 8.4Hz, 2 H), 6.92(s, 1 H), 6.21(s, 1 H), 3.73(s, 3 H);  $^{13}\text{C NMR}$  (75 MHz,  $\text{CDCl}_3$ ):  $\delta$  169.0, 163.2, 137.2, 135.5, 133.1, 132.6, 131.8, 130.2, 112.5, 112.3, 85.7, 53.1.

**IR:**  $\nu$  2923, 2229, 1729, 1580, 1437, 1401, 1338, 1253, 1158, 1073, 1007, 900, 827, 726, 611  $\text{cm}^{-1}$ .

**HRMS-ESI** ( $m/z$ ): calcd for  $\text{C}_{14}\text{H}_9\text{BrN}_2\text{O}_2+\text{NH}_4^+$ :334.0186; found: 334.0177, 2.7ppm..

**(4S,5S)-ethyl 3,3-dicyano-4-hydroxy-5-isopropyl-2-(4-methoxyphenyl)cyclohex-1-enecarboxylate: 5a**

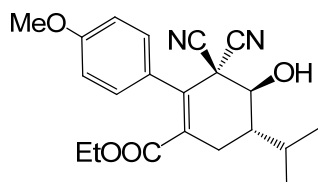

Colorless solid,  $[\alpha]_{\text{D}}^{20}$  = -9 ( $c=1.0$ ,  $\text{CHCl}_3$ ); mp 123 °C.  $^1\text{H NMR}$  (300 MHz,  $\text{CDCl}_3$ ):  $\delta$  7.26-7.29(dd,  $J$  = 2.1 Hz, 6.6 Hz, 2 H), 6.91-6.93(dd,  $J$  = 1.8 Hz, 6.6 Hz, 2 H), 4.11-4.17(dd,  $J$  = 6.3 Hz, 11.4 Hz, 1 H), 3.88-3.95(dd,  $J$  = 6.9 Hz, 14.1 Hz, 2 H), 3.83(s, 3 H), 3.25(d,  $J$  = 6.9 Hz, 1 H), 2.52-2.61(dd,  $J$  = 6.0 Hz, 5.7 Hz, 1 H), 2.34-2.44(m, 2 H), 2.09-2.20(m, 1 H), 1.03(d,  $J$  = 6.9 Hz, 3 H), 0.87-0.94(m, 6.0 H);  $^{13}\text{C NMR}$  (75 MHz,  $\text{CDCl}_3$ ):  $\delta$  167.5, 160.3, 136.4, 130.1, 129.9, 127.4, 114.2, 114.0, 113.0, 73.7, 61.4, 55.3, 48.5, 40.4, 26.3, 25.7, 20.0, 15.2, 13.6.

**IR:**  $\nu$  3462, 2963, 2253, 1716, 1663, 1608, 1512, 1465, 1371, 1290, 1252, 1179, 1107, 1027, 913, 833, 734  $\text{cm}^{-1}$ .

**HRMS-ESI** ( $m/z$ ): calcd for  $\text{C}_{21}\text{H}_{24}\text{N}_2\text{O}_4+\text{H}^+$ : 369.1809; found: 369.1820, 3.0ppm.

**Major diastereomer:** ee was determined by HPLC analysis (Chiralcel OD-H, *i*-PrOH/ Hexane = 5/95, 1.0 mL/min, 217 nm.) Retention time:  $t_{\text{major}}$  =11.043 min,  $t_{\text{minor}}$  =20.611 min, ee = 97%.

**(4*S*,5*S*)-ethyl 3,3-dicyano-4-hydroxy-5-isopropyl-2-phenylcyclohex-1-enecarboxylate: 5b**

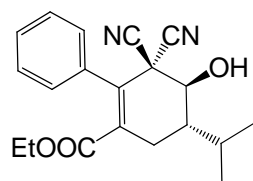

Colorless crystal,  $[\alpha]_{\text{D}}^{20} = -24$  ( $c=1.0$ ,  $\text{CHCl}_3$ ); mp 156 °C.  $^1\text{H NMR}$  (300 MHz,  $\text{CDCl}_3$ ):  $\delta$  7.33-7.41(m, 5 H), 4.14-4.20(dd,  $J = 6.9$  Hz, 11.4 Hz, 1 H), 3.85-3.92(dd,  $J = 7.2$  Hz, 14.1 Hz, 2 H), 2.99(d,  $J = 4.8$  Hz, 1 H), 2.56-2.64(dd,  $J = 6.0$  Hz, 5.7 Hz, 1 H), 2.36-2.47(m, 2 H), 2.12-2.23(m, 1 H), 1.05(d,  $J = 6.9$  Hz, 3 H), 0.96(d,  $J = 6.9$  Hz, 3 H), 0.81(t,  $J = 7.2$  Hz, 3 H);  $^{13}\text{C NMR}$  (75 MHz,  $\text{CDCl}_3$ ):  $\delta$  167.2, 136.4, 135.2, 130.4, 129.4, 128.7, 128.6, 114.0, 112.8, 73.8, 61.4, 48.3, 40.4, 26.3, 25.7, 20.0, 15.3, 13.4.

**IR:**  $\nu$  3463, 2966, 2254, 1714, 1662, 1467, 1371, 1281, 1259, 1106, 1020, 765, 705  $\text{cm}^{-1}$ .

**HRMS-ESI** ( $m/z$ ): calcd for  $\text{C}_{20}\text{H}_{22}\text{N}_2\text{O}_3 + \text{NH}_4^+$ : 356.1969; found: 356.1979, 2.8 ppm.

**Major diastereomer:** ee was determined by HPLC analysis (Chiralcel OD-H, *i*-PrOH/ Hexane = 5/95, 1.0 mL/min, 213 nm.) Retention time:  $t_{\text{major}} = 7.337$  min,  $t_{\text{minor}} = 10.553$  min, ee = 97%.

**(4*S*,5*S*)-ethyl 3,3-dicyano-4-hydroxy-5-isopropyl-2-(naphthalen-1-yl)cyclohex-1-enecarboxylate: 5c**

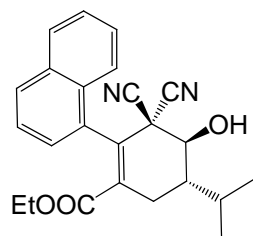

White solid,  $[\alpha]_{\text{D}}^{20} = -13$  ( $c=1.0$ ,  $\text{CHCl}_3$ ); mp 131 °C.  $^1\text{H NMR}$  (300 MHz,  $\text{CDCl}_3$ ):  $\delta$  8.01(d,  $J = 8.1$  Hz, 1 H), 7.84-7.89(dd,  $J = 5.1$  Hz, 12.6 Hz, 2 H), 7.43-7.55(m, 4 H), 4.23-4.29(dd,  $J = 6.6$  Hz, 10.8 Hz, 1 H), 3.59-3.63(dd,  $J = 2.4$  Hz, 7.2 Hz, 2 H), 3.24(d,  $J = 6.9$  Hz, 1 H), 2.80-2.88(dd,  $J = 5.7$  Hz, 5.4 Hz, 1 H), 2.31-2.53(m, 3 H), 1.09(d,  $J = 7.2$  Hz, 3 H), 0.96(d,  $J = 6.6$  Hz, 3 H), 0.33(t,  $J = 7.2$  Hz, 3 H);  $^{13}\text{C NMR}$  (75 MHz,  $\text{CDCl}_3$ ):  $\delta$  166.7, 138.6, 133.5, 132.2, 131.4, 129.8, 128.4, 128.3, 126.7, 126.4, 125.4, 124.7, 114.1, 112.7, 74.4, 61.2, 48.8, 40.5, 26.4, 25.9, 20.1, 15.4, 12.8.

**IR:**  $\nu$  3463, 3059, 2964, 2255, 1712, 1655, 1508, 1467, 1371, 1261, 1138, 1094, 1019, 912, 778, 734  $\text{cm}^{-1}$ .

**HRMS-ESI** ( $m/z$ ): calcd for  $\text{C}_{24}\text{H}_{24}\text{N}_2\text{O}_3 + \text{NH}_4^+$ : 406.2125; found: 406.2130, 1.2 ppm.

**Major diastereomer:** ee was determined by HPLC analysis (Chiralcel AS-H, *i*-PrOH/ Hexane = 5/95, 1.0 mL/min, 221 nm.) Retention time:  $t_{\text{major}}=20.644$  min, ee > 99%.

**(4*S*,5*S*)-ethyl 3,3-dicyano-4-hydroxy-5-isopropyl-2-*p*-tolylcyclohex-1-enecarboxylate: 5d**

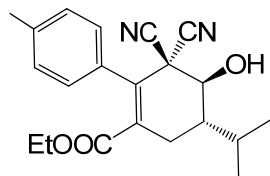

Colorless crystal,  $[\alpha]_{\text{D}}^{20} = -12$  ( $c=1.0$ ,  $\text{CHCl}_3$ ); mp 154 °C.  $^1\text{H NMR}$  (300 MHz,  $\text{CDCl}_3$ ):  $\delta$  7.18-7.25(m, 4 H), 4.12-4.17(dd,  $J = 3.6$  Hz, 11.1 Hz, 1 H), 3.87-3.94(dd,  $J = 7.2$  Hz, 14.1 Hz, 2 H), 3.21(d,  $J = 5.4$  Hz, 1 H), 2.53-2.61(dd,  $J = 6.0$  Hz, 5.7 Hz, 1 H), 2.35-2.45(m, 5 H), 2.10-2.21(m, 1 H), 1.03(d,  $J = 6.9$  Hz, 3 H), 0.94(d,  $J = 6.9$  Hz, 3 H), 0.86(t,  $J = 6.9$  Hz, 3 H);  $^{13}\text{C NMR}$  (75 MHz,  $\text{CDCl}_3$ ):  $\delta$  167.4, 139.3, 136.2, 132.2, 130.4, 129.3, 128.5, 114.1, 112.9, 73.7, 61.4, 48.4, 40.4, 26.3, 25.7, 21.3, 20.0, 15.2, 13.4.

**IR:**  $\nu$  3430, 2968, 2249, 1718, 1666, 1510, 1464, 1394, 1370, 1279, 1255, 1108, 1055, 1017, 911, 821, 727  $\text{cm}^{-1}$ .

**HRMS-ESI ( $m/z$ ):** calcd for  $\text{C}_{21}\text{H}_{24}\text{N}_2\text{O}_3+\text{NH}_4^+$ : 370.2125; found: 370.2128, 0.8ppm.

**Major diastereomer:** ee was determined by HPLC analysis (Chiralcel OD-H, *i*-PrOH/ Hexane = 5/95, 1.0 mL/min, 220 nm.) Retention time:  $t_{\text{major}}=7.002$  min, ee > 99%.

**(4*S*,5*S*)-ethyl 3,3-dicyano-4-hydroxy-5-isopropyl-2-(3-methoxyphenyl)cyclohex-1-enecarboxylate: 5e**

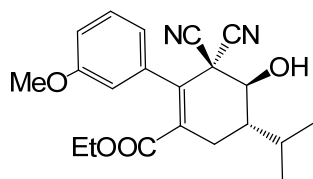

Colorless solid,  $[\alpha]_{\text{D}}^{20} = -9$  ( $c=1.0$ ,  $\text{CHCl}_3$ ); mp 112 °C.  $^1\text{H NMR}$  (300 MHz,  $\text{CDCl}_3$ ):  $\delta$  7.27-7.34(dd,  $J = 8.1$  Hz, 15.9 Hz, 1 H), 6.89-6.97(m, 3 H), 4.12-4.17(dd,  $J = 5.4$  Hz, 11.1 Hz, 1 H), 3.88-3.95(dd,  $J = 6.9$  Hz, 14.1 Hz, 2 H), 3.81(s, 3 H), 3.27-3.29(d,  $J = 6.6$  Hz, 1 H), 2.54-2.62(dd,  $J = 6.0$  Hz, 6.0 Hz, 1 H), 2.35-2.46(m, 2 H), 2.11-2.21(m, 1 H), 1.03(d,  $J = 6.9$  Hz, 3 H), 0.84-0.94(m, 6 H);  $^{13}\text{C NMR}$  (75 MHz,  $\text{CDCl}_3$ ):  $\delta$  167.3, 159.5, 136.4, 130.1, 129.8, 121.0, 115.3, 114.1, 113.9, 113.0, 73.7, 61.5, 55.3, 48.1, 40.4, 26.3, 25.7, 20.0, 15.2, 13.4.

**IR:**  $\nu$  3463, 2963, 2254, 1716, 1657, 1581, 1466, 1427, 1371, 1287, 1261, 1209, 1104, 1031, 913,

797, 735  $\text{cm}^{-1}$ .

**HRMS-ESI** ( $m/z$ ): calcd for  $\text{C}_{21}\text{H}_{24}\text{N}_2\text{O}_4+\text{NH}_4^+$ : 386.2074; found: 386.2072, 0.5ppm.

**Major diastereomer:** ee was determined by HPLC analysis (Chiralcel OD-H, *i*-PrOH/ Hexane = 5/95, 1.0 mL/min, 208 nm.) Retention time:  $t_{\text{major}}=11.019$  min, ee > 99%.

**(4*S*,5*S*)-ethyl 3,3-dicyano-4-hydroxy-5-isopropyl-2-*m*-tolylcyclohex-1-enecarboxylate: 5f**

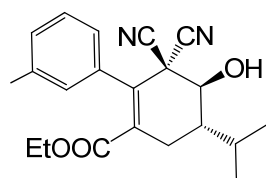

Colorless crystal,  $[\alpha]_{\text{D}}^{20} = -16$  ( $c=1.0$ ,  $\text{CHCl}_3$ ); mp 128 °C.  **$^1\text{H NMR}$**  (300 MHz,  $\text{CDCl}_3$ ):  $\delta$  7.28-7.32(m, 1 H), 7.12-7.26(m, 3 H), 4.60-4.62(d,  $J = 5.4$  Hz, 0.6 H), 4.12-4.18(dd,  $J = 6.6$  Hz, 11.1 Hz, 0.4 H), 3.86-3.94(dd,  $J = 7.2$  Hz, 12.9 Hz, 2 H), 2.93-2.97(t,  $J = 6.6$  Hz, 1 H), 2.37-2.70(m, 5.5 H), 2.15-2.22(m, 0.5 H), 1.78-1.84(m, 1 H), 1.02-1.08(m, 5 H), 0.93-0.96(d,  $J = 6.9$  Hz, 1 H), 0.81-0.86(dt,  $J = 1.5$  Hz, 6.9 Hz, 3 H);  **$^{13}\text{C NMR}$**  (75 MHz,  $\text{CDCl}_3$ ):  $\delta$  167.5, 138.2, 136.2, 135.8, 135.2, 129.9, 129.2, 128.4, 125.7, 113.5, 113.2, 73.8, 70.6, 61.2, 48.2, 40.5, 29.1, 26.6, 25.7, 21.4, 20.3, 20.0, 15.3, 13.4.

**IR:**  $\nu$  3463, 2963, 2252, 1716, 1656, 1604, 1466, 1371, 1257, 1186, 1102, 1019, 714  $\text{cm}^{-1}$ .

**HRMS-ESI** ( $m/z$ ): calcd for  $\text{C}_{21}\text{H}_{24}\text{N}_2\text{O}_3+\text{NH}_4^+$ : 370.2125; found: 370.2122, 0.8ppm.

**Major diastereomer:** ee was determined by HPLC analysis (Chiralcel AD-H, *i*-PrOH/ Hexane = 5/95, 1.0 mL/min, 215 nm.) Retention time:  $t_{\text{major}}=8.545$  min,  $t_{\text{minor}}=9.853$  min, ee = 96%.

**(4*S*,5*S*)-ethyl 3,3-dicyano-4-hydroxy-5-isopropyl-2-*o*-tolylcyclohex-1-enecarboxylate: 5g**

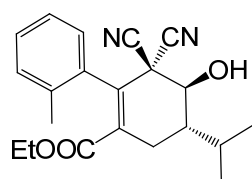

White solid,  $[\alpha]_{\text{D}}^{20} = -17$  ( $c=1.0$ ,  $\text{CHCl}_3$ ); mp 134 °C.  **$^1\text{H NMR}$**  (300 MHz,  $\text{CDCl}_3$ ):  $\delta$  7.21-2.28(m, 4 H), 4.61(d,  $J = 4.8$  Hz, 1 H), 3.84-3.91(m, 2 H), 3.35-3.39(m, 1 H), 2.19-2.82 (cm, 6 H), 1.80-1.82(m, 1 H), 1.03-1.05(m, 5 H), 0.91-0.94(m, 1 H), 0.76-0.84(m, 3 H);  **$^{13}\text{C NMR}$**  (75 MHz,  $\text{CDCl}_3$ ):  $\delta$  167.0, 137.2, 136.4, 135.2, 130.3, 129.2, 129.0, 128.5, 127.5, 125.8, 113.4, 113.3, 73.5, 70.3, 61.2, 46.5, 40.4, 29.2, 26.6, 20.3, 19.5, 15.3, 13.3.

**IR:**  $\nu$  3467, 2965, 2230, 1714, 1655, 1583, 1463, 1371, 1280, 1258, 1231, 1108, 1034, 758, 730

cm<sup>-1</sup>.

**HRMS-ESI** (*m/z*): calcd for C<sub>21</sub>H<sub>24</sub>N<sub>2</sub>O<sub>3</sub>+NH<sub>4</sub><sup>+</sup>: 370.2125; found: 370.2119, 1.6ppm.

**Major diastereomer:** ee was determined by HPLC analysis (Chiralcel AD-H, *i*-PrOH/ Hexane = 5/95, 1.0 mL/min, 215 nm.) Retention time: *t*<sub>minor</sub> = 7.451 min, *t*<sub>major</sub> = 8.200 min, ee = 97%.

**(4*S*,5*S*)-ethyl 2-(4-bromophenyl)-3,3-dicyano-4-hydroxy-5-isopropylcyclohex-1-enecarboxylate: 5h**

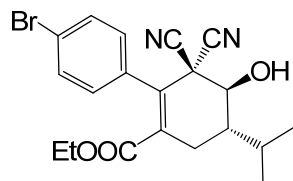

Colorless crystal, [ $\alpha$ ]<sub>D</sub><sup>20</sup> = -6 (*c*=1.0, CHCl<sub>3</sub>); mp 151 °C. **<sup>1</sup>H NMR** (300 MHz, CDCl<sub>3</sub>):  $\delta$  7.55-7.58(dd, *J* = 2.1 Hz, 6.6 Hz, 2 H), 7.21-7.24(dd, *J* = 1.8 Hz, 6.6 Hz, 2 H), 4.11-4.17(dd, *J* = 6.9 Hz, 11.4 Hz, 1 H), 3.89-3.96(dd, *J* = 6.9 Hz, 14.1 Hz, 2 H), 3.25(d, *J* = 6.9 Hz, 1 H), 2.56-2.64(dd, *J* = 5.7 Hz, 5.7 Hz, 1 H), 2.35-2.45(m, 2 H), 2.09-2.20(m, 1 H), 1.04(d, *J* = 6.9 Hz, 3 H), 0.88-0.94(m, 6 H); **<sup>13</sup>C NMR** (75 MHz, CDCl<sub>3</sub>):  $\delta$  166.8, 137.1, 134.0, 131.9, 130.4, 129.4, 123.9, 113.9, 112.7, 73.7, 61.7, 48.1, 40.4, 26.3, 25.6, 20.0, 15.2, 13.5.

**IR:**  $\nu$  3465, 2964, 2255, 1717, 1657, 1587, 1487, 1392, 1371, 1257, 1105, 1072, 1012, 912, 825, 733 cm<sup>-1</sup>.

**HRMS-ESI** (*m/z*): calcd for C<sub>20</sub>H<sub>21</sub>BrN<sub>2</sub>O<sub>3</sub>+NH<sub>4</sub><sup>+</sup>: 434.1074; found: 434.1072, 0.5ppm.

**Major diastereomer:** ee was determined by HPLC analysis (Chiralcel OD-H, *i*-PrOH/ Hexane = 5/95, 1.0 mL/min, 216 nm.) Retention time: *t*<sub>major</sub> = 7.164 min, *t*<sub>minor</sub> = 10.085 min, ee = 95%.

**(4*S*,5*S*)-ethyl 2-(4-chlorophenyl)-3,3-dicyano-4-hydroxy-5-isopropylcyclohex-1-enecarboxylate: 5i**

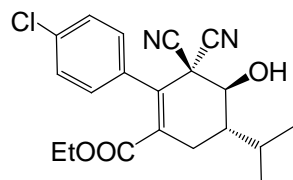

Colorless crystal, [ $\alpha$ ]<sub>D</sub><sup>20</sup> = -10 (*c*=1.0, CHCl<sub>3</sub>); mp 140 °C. **<sup>1</sup>H NMR** (300 MHz, CDCl<sub>3</sub>):  $\delta$  7.38-7.42(m, 2 H), 7.26-7.31(m, 2 H), 4.12-4.18(dd, *J* = 5.4 Hz, 11.4 Hz, 1 H), 3.89-3.96(dd, *J* = 7.2 Hz, 14.4 Hz, 2 H), 3.19(d, *J* = 6.3 Hz, 1 H), 2.35-2.66(m, 3 H), 2.10-2.20(m, 1 H), 1.04(d, *J* = 7.2 Hz, 3 H), 0.87-0.94(m, 6 H); **<sup>13</sup>C NMR** (75 MHz, CDCl<sub>3</sub>):  $\delta$  166.9, 137.1, 135.7, 133.6, 130.2,

129.3, 129.0, 113.9, 112.7, 73.7, 61.7, 48.1, 40.4, 26.3, 25.6, 20.0, 15.2, 13.5.

**IR:**  $\nu$  3463, 2963, 2927, 2255, 1717, 1655, 1593, 1491, 1467, 1371, 1257, 1094, 1015, 912, 828, 732  $\text{cm}^{-1}$ .

**HRMS-ESI** ( $m/z$ ): calcd for  $\text{C}_{20}\text{H}_{21}\text{ClN}_2\text{O}_3+\text{NH}_4^+$ : 390.1579; found: 390.1573, 1.5ppm.

**Major diastereomer:** ee was determined by HPLC analysis (Chiralcel OD-H, *i*-PrOH/ Hexane = 5/95, 1.0 mL/min, 220 nm.) Retention time:  $t_{\text{major}}=6.651$  min,  $t_{\text{minor}}=8.576$  min, ee = 97%.

**(4S,5S)-ethyl 3,3-dicyano-2-(4-fluorophenyl)-4-hydroxy-5-isopropylcyclohex-1-enecarboxylate: 5j**

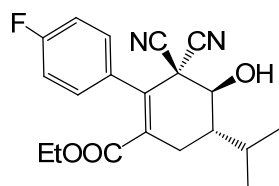

Colorless crystal,  $[\alpha]_{\text{D}}^{20} = -14$  ( $c=1.0$ ,  $\text{CHCl}_3$ ); mp 140 °C.  **$^1\text{H NMR}$**  (300 MHz,  $\text{CDCl}_3$ ):  $\delta$  7.30-7.36(m, 2 H), 7.07-7.14(m, 2 H), 4.62(d,  $J = 5.7$  Hz, 0.4 H), 4.11-4.18(dd,  $J = 6.9$  Hz, 11.4 Hz, 0.6 H), 3.88-3.95(dd,  $J = 6.9$  Hz, 14.1 Hz, 2 H), 3.24-3.29(m, 1 H), 2.34-2.71(m, 2.5 H), 2.11-2.20(m, 0.5 H), 1.75-1.85(m, 1 H), 1.02-1.06(m, 4 H), 0.86-0.94(m, 5 H);  **$^{13}\text{C NMR}$**  (75 MHz,  $\text{CDCl}_3$ ):  $\delta$  167.2, 167.0, 137.2, 131.8, 131.7, 130.9, 130.8, 129.3, 127.8, 115.9, 115.6, 114.0, 112.7, 73.7, 70.3, 61.6, 61.4, 48.3, 46.1, 40.4, 29.0, 26.6, 26.3, 25.6, 20.3, 20.0, 15.2, 13.5.

**IR:**  $\nu$  3466, 2965, 2256, 1716, 1655, 1602, 1509, 1470, 1372, 1234, 1161, 1101, 1016, 913, 837, 734  $\text{cm}^{-1}$ .

**HRMS-ESI** ( $m/z$ ): calcd for  $\text{C}_{20}\text{H}_{21}\text{FN}_2\text{O}_3+\text{NH}_4^+$ : 374.1874; found: 374.1865, 2.4ppm.

**Major diastereomer:** ee was determined by HPLC analysis (Chiralcel OD-H, *i*-PrOH/ Hexane = 5/95, 1.0 mL/min, 208 nm.) Retention time:  $t_{\text{major}}=7.030$  min,  $t_{\text{minor}}=9.108$  min, ee = 93%.

**(4S,5S)-ethyl 3,3-dicyano-4-hydroxy-5-isopropyl-2-(4-(trifluoromethyl)phenyl)cyclohex-1-enecarboxylate: 5k**

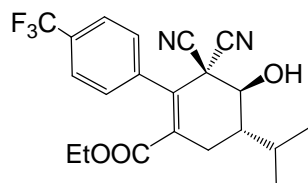

White solid,  $[\alpha]_{\text{D}}^{20} = -14$  ( $c=1.0$ ,  $\text{CHCl}_3$ ); mp 140 °C.  **$^1\text{H NMR}$**  (300 MHz,  $\text{CDCl}_3$ ):  $\delta$  7.71(d,  $J = 8.1$  Hz, 2 H), 7.50(d,  $J = 8.1$  Hz, 2 H), 4.15-4.21(dd,  $J = 6.9$  Hz, 11.4 Hz, 1 H), 3.87-3.94(dd,  $J =$

6.9 Hz, 14.1 Hz, 2 H), 3.16(d,  $J = 6.9$  Hz, 1 H), 2.60-2.69(dd,  $J = 5.7$  Hz, 5.7 Hz, 1 H), 2.36-2.48(m, 2 H), 2.12-2.23(m, 1 H), 1.05(d,  $J = 6.9$  Hz, 3 H), 0.96(d,  $J = 6.9$  Hz, 3 H), 0.82(t,  $J = 7.2$  Hz, 3 H);  $^{13}\text{C}$  NMR (75 MHz,  $\text{CDCl}_3$ ):  $\delta$  166.5, 138.8, 137.4, 129.5, 129.4, 125.6, 125.5, 113.7, 112.5, 73.8, 61.7, 47.9, 40.4, 26.4, 25.7, 20.0, 15.2, 13.3.

**IR:**  $\nu$  3462, 2965, 2255, 1718, 1656, 1371, 1326, 1256, 1169, 1131, 1069, 1018, 838, 736  $\text{cm}^{-1}$ .

**HRMS-ESI** ( $m/z$ ): calcd for  $\text{C}_{21}\text{H}_{21}\text{F}_3\text{N}_2\text{O}_3 + \text{NH}_4^+$ : 424.1843; found: 424.1847, 0.9ppm.

**Major diastereomer:** ee was determined by HPLC analysis (Chiralcel OD-H, *i*-PrOH/ Hexane = 5/95, 0.5 mL/min, 215 nm.) Retention time:  $t_{\text{major}} = 12.259$  min, ee >99%.

**(4S,5S)-ethyl 2-(3-bromophenyl)-3,3-dicyano-4-hydroxy-5-isopropylcyclohex-1-enecarboxylate: 5l**

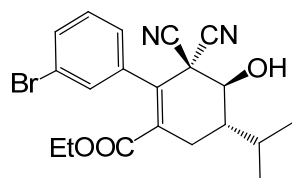

Pale yellow solid,  $[\alpha]_{\text{D}}^{20} = -11$  ( $c=1.0$ ,  $\text{CHCl}_3$ ); mp 134 °C.  $^1\text{H}$  NMR (300 MHz,  $\text{CDCl}_3$ ):  $\delta$  7.54-7.58(m, 1 H), 7.48-7.49(m, 1 H), 7.29-7.32(m, 2 H), 4.63-4.64(d,  $J = 5.4$  Hz, 1 H), 3.91-3.98(dd,  $J = 6.9$  Hz, 14.1 Hz, 2 H), 2.85(t,  $J = 5.4$  Hz, 1 H), 2.38-2.73(m, 2.5 H), 2.13-2.22(m, 0.5 H), 1.77-1.86(m, 1 H), 0.87-1.08(m, 9 H);  $^{13}\text{C}$  NMR (75 MHz,  $\text{CDCl}_3$ ):  $\delta$  166.8, 137.4, 132.5, 132.3, 131.8, 130.1, 129.0, 127.4, 122.5, 113.1, 112.5, 77.4, 77.0, 76.6, 73.8, 61.4, 47.9, 40.4, 29.1, 26.6, 25.7, 20.3, 15.3, 13.5.

**IR:**  $\nu$  3463, 2964, 2254, 1716, 1654, 1561, 1471, 1371, 1282, 1258, 1137, 1074, 788, 733, 704, 664  $\text{cm}^{-1}$ .

**HRMS-ESI** ( $m/z$ ): calcd for  $\text{C}_{20}\text{H}_{21}\text{BrN}_2\text{O}_3 + \text{NH}_4^+$ : 434.1071; found: 434.1060, 2.5ppm.

**Major diastereomer:** ee was determined by HPLC analysis (Chiralcel OD-H, *i*-PrOH/ Hexane = 5/95, 0.5 mL/min, 223 nm.) Retention time:  $t_{\text{major}} = 14.406$  min,  $t_{\text{minor}} = 19.203$  min, ee = 96%.

**(4S,5S)-ethyl 2-(3-chlorophenyl)-3,3-dicyano-4-hydroxy-5-isopropylcyclohex-1-enecarboxylate: 5m**

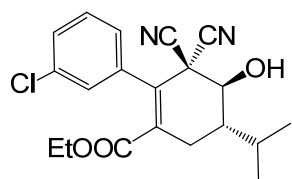

White solid,  $[\alpha]_D^{20} = -15$  ( $c=1.0$ ,  $\text{CHCl}_3$ ); mp 105 °C.  $^1\text{H NMR}$  (300 MHz,  $\text{CDCl}_3$ ):  $\delta$  7.23-7.39(m, 4 H), 4.62(br, 1 H), 3.90-3.97(dd,  $J = 6.9$  Hz, 14.1 Hz, 2 H), 3.22(s, 1 H), 2.65-2.72(m, 2.5 H), 2.13-2.21(m, 0.5 H), 1.76-1.83(m, 1 H), 1.02-1.07(m, 4 H), 0.86-0.95(m, 5 H);  $^{13}\text{C NMR}$  (75 MHz,  $\text{CDCl}_3$ ):  $\delta$  167.0, 137.5, 134.4, 129.9, 129.6, 129.4, 129.0, 127.5, 127.0, 113.2, 113.0, 73.7, 70.4, 61.5, 47.9, 40.5, 29.1, 26.6, 20.3, 15.2, 13.5.

**IR:**  $\nu$  3461, 2962, 2928, 2250, 1719, 1655, 1565, 1471, 1371, 1283, 1259, 1136, 1087, 1017, 789, 706  $\text{cm}^{-1}$ .

**HRMS-ESI** ( $m/z$ ): calcd for  $\text{C}_{20}\text{H}_{21}\text{ClN}_2\text{O}_3 + \text{NH}_4^+$ : 390.1579; found: 390.1571, 2.1 ppm.

**Major diastereomer:** ee was determined by HPLC analysis (Chiralcel OD-H, *i*-PrOH/ Hexane = 5/95, 0.5 mL/min, 213 nm.) Retention time:  $t_{\text{major}} = 14.118$  min, ee >99%.

**(4*S*,5*S*)-ethyl 3,3-dicyano-2-(2-fluorophenyl)-4-hydroxy-5-isopropylcyclohex-1-enecarboxylate: 5n**

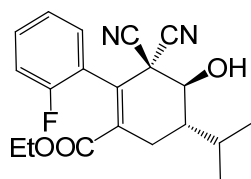

White solid,  $[\alpha]_D^{20} = -40$  ( $c=1.0$ ,  $\text{CHCl}_3$ ); mp 134 °C.  $^1\text{H NMR}$  (300 MHz,  $\text{CDCl}_3$ ):  $\delta$  7.38-7.44(m, 2 H), 7.11-7.24(m, 2 H), 4.63(d,  $J = 6.0$  Hz, 0.4 H), 4.14-4.20(dd,  $J = 6.9$  Hz, 11.4 Hz, 0.6 H), 3.90-3.97(dd,  $J = 7.2$  Hz, 14.4 Hz, 2 H), 3.29-3.39(dd,  $J = 6.9$  Hz, 6.0 Hz, 1 H), 2.64-2.79(m, 1 H), 2.35-2.55(m, 1.5 H), 2.14-2.23(m, 0.5 H), 1.81-1.85(m, 1 H), 1.02-1.06(m, 4 H), 0.85-0.94(m, 5 H);  $^{13}\text{C NMR}$  (75 MHz,  $\text{CDCl}_3$ ):  $\delta$  166.2, 158.0, 131.5, 131.4, 131.3, 124.4, 115.9, 115.6, 70.4, 61.6, 48.3, 40.4, 29.1, 26.3, 25.7, 20.3, 20.2, 20.0, 15.2, 13.4.

**IR:**  $\nu$  3468, 2966, 2254, 1715, 1657, 1613, 1490, 1448, 1371, 1261, 1136, 1104, 1021, 808, 763  $\text{cm}^{-1}$ .

**HRMS-ESI** ( $m/z$ ): calcd for  $\text{C}_{20}\text{H}_{21}\text{FN}_2\text{O}_3 + \text{NH}_4^+$ : 374.1874; found: 374.1871, 0.3 ppm.

**Major diastereomer:** ee was determined by HPLC analysis (Chiralcel OD-H, *i*-PrOH/ Hexane = 5/95, 1.0 mL/min, 212 nm.) Retention time:  $t_{\text{major}} = 9.269$  min,  $t_{\text{minor}} = 11.573$  min, ee = 97%.

**(4*S*,5*S*)-ethyl 3,3-dicyano-2-(furan-2-yl)-4-hydroxy-5-isopropylcyclohex-1-enecarboxylate: 5o**



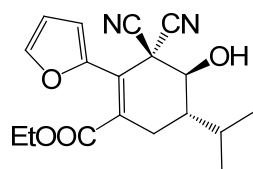

Colorless solid,  $[\alpha]_D^{20} = -23$  ( $c=1.0$ ,  $\text{CHCl}_3$ ); mp 114 °C.  $^1\text{H NMR}$  (300 MHz,  $\text{CDCl}_3$ ):  $\delta$  7.47(d,  $J = 1.2$  Hz, 1 H), 6.69-6.73(dd,  $J = 3.6$  Hz, 9.0 Hz, 1 H), 6.46-6.49(m, 1 H), 4.62(d,  $J = 4.2$  Hz, 1 H), 4.20-4.25(dd,  $J = 6.0$  Hz, 6.9 Hz, 2 H), 3.49-3.57(dd,  $J = 7.2$  Hz, 5.7 Hz, 1 H), 2.34-2.64(m, 2.5 H), 2.09-2.11(m, 0.5 H), 1.69-1.84(m, 1 H), 1.19-1.24(dt,  $J = 1.8$  Hz, 6.9 Hz, 3 H), 0.98-1.04(m, 5 H), 0.88(d,  $J = 6.9$  Hz, 1 H);  $^{13}\text{C NMR}$  (75 MHz,  $\text{CDCl}_3$ ):  $\delta$  168.5, 147.5, 143.6, 135.9, 135.1, 116.8, 113.5, 112.9, 111.6, 111.2, 73.9, 70.5, 61.9, 44.6, 40.5, 28.9, 27.1, 20.2, 14.0.

**IR:**  $\nu$  3466, 3154, 2966, 2256, 1723, 1652, 1472, 1371, 1284, 1250, 1162, 1020, 911, 743, 591  $\text{cm}^{-1}$ .

**HRMS-ESI** ( $m/z$ ): calcd for  $\text{C}_{18}\text{H}_{20}\text{N}_2\text{O}_4 + \text{NH}_4^+$ : 346.1761; found: 346.1750, 2.9ppm.

**Major diastereomer:** ee was determined by HPLC analysis (Chiralcel OD-H, *i*-PrOH/ Hexane = 5/95, 1.0 mL/min, 275 nm.) Retention time:  $t_{\text{major}} = 12.100$  min, ee > 99%.

**(4S,5S)-ethyl 3,3-dicyano-4-hydroxy-5-isopropyl-2-(thiophen-2-yl)cyclohex-1-enecarboxylate:**

**5p**

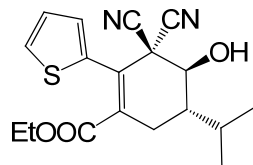

Pale yellow solid,  $[\alpha]_D^{20} = +35$  ( $c=1.0$ ,  $\text{CHCl}_3$ ); mp 153 °C.  $^1\text{H NMR}$  (300 MHz,  $\text{CDCl}_3$ ):  $\delta$  7.42-7.44(dd,  $J = 1.2$  Hz, 5.1 Hz, 1 H), 7.18-7.20(dd,  $J = 0.9$  Hz, 3.3 Hz, 1 H), 7.05-7.08(dd,  $J = 3.6$  Hz, 5.1 Hz, 1 H), 4.12-4.18(dd,  $J = 6.9$  Hz, 11.4 Hz, 1 H), 3.98-4.05(dd,  $J = 7.2$  Hz, 14.1 Hz, 2 H), 3.26(d,  $J = 6.9$  Hz, 1 H), 2.54-2.62(dd,  $J = 6.0$  Hz, 5.7 Hz, 1 H), 2.35-2.45(m, 2 H), 2.09-2.19(m, 1 H), 0.99-1.03(m, 6 H), 0.93(d,  $J = 6.9$  Hz, 3 H);  $^{13}\text{C NMR}$  (75 MHz,  $\text{CDCl}_3$ ):  $\delta$  167.3, 139.3, 134.7, 129.1, 127.9, 127.3, 123.3, 114.1, 112.7, 73.6, 61.8, 48.6, 40.3, 26.7, 25.6, 20.0, 15.2, 13.6.

**IR:**  $\nu$  3471, 3108, 2965, 2254, 1725, 1650, 1464, 1435, 1370, 1260, 1196, 1095, 1016, 855, 713  $\text{cm}^{-1}$ .

**HRMS-ESI** ( $m/z$ ): calcd for  $\text{C}_{18}\text{H}_{20}\text{N}_2\text{O}_3\text{S} + \text{NH}_4^+$ : 362.1533; found: 362.1537, 1.1ppm.

**Major diastereomer:** ee was determined by HPLC analysis (Chiralcel OD-H, *i*-PrOH/ Hexane =

5/95, 1.0 mL/min, 225 nm.) Retention time:  $t_{\text{major}}=9.732$  min,  $t_{\text{minor}}=18.197$  min, ee = 97%.

**(4S,5R)-ethyl 3,3-dicyano-5-ethyl-4-hydroxy-2-(4-methoxyphenyl)cyclohex-1-enecarboxylate:**

**5q**

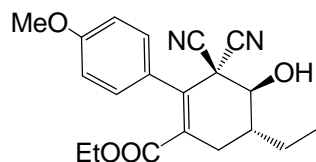

White solid,  $[\alpha]_{\text{D}}^{20} = -21$  ( $c=1.0$ ,  $\text{CHCl}_3$ ); mp 102 °C.  **$^1\text{H NMR}$**  (300 MHz,  $\text{CDCl}_3$ ):  $\delta$  7.25-7.31(m, 2 H), 6.90-6.95(m, 2 H), 4.02-4.07(dd,  $J = 2.7$  Hz, 3.3 Hz, 1 H), 3.89-3.96(dd,  $J = 7.2$  Hz, 14.4 Hz, 2 H), 3.83(s, 3 H), 3.18(br, 1 H), 2.75-2.83(dd,  $J = 5.4$  Hz, 5.7 Hz, 1 H), 2.25-2.33(m, 1 H), 1.96-2.13(m, 2 H), 1.31-1.41(m, 1 H), 0.99-1.04(m, 3 H), 0.90(t,  $J = 7.2$  Hz, 3 H);  **$^{13}\text{C NMR}$**  (75 MHz,  $\text{CDCl}_3$ ):  $\delta$  167.4, 160.3, 136.0, 130.3, 130.1, 127.4, 114.0, 112.9, 75.1, 61.4, 55.3, 48.1, 37.1, 31.6, 23.5, 13.6, 10.1.

**IR:**  $\nu$  3463, 2969, 2253, 1716, 1656, 1608, 1512, 1464, 1371, 1293, 1251, 1180, 1105, 1028, 832, 735  $\text{cm}^{-1}$ .

**HRMS-ESI ( $m/z$ ):** calcd for  $\text{C}_{20}\text{H}_{22}\text{N}_2\text{O}_4+\text{NH}_4^+$ : 372.1918; found: 372.1928, 2.7ppm.

**Major diastereomer:** ee was determined by HPLC analysis (Chiralcel OD-H, *i*-PrOH/ Hexane = 5/95, 1.0 mL/min, 216 nm.) Retention time:  $t_{\text{major}}=13.859$  min,  $t_{\text{minor}}=22.268$  min, ee =92%.

**(4S,5S)-ethyl 3,3-dicyano-4-hydroxy-2-(4-methoxyphenyl)-5-phenylcyclohex-1-enecarboxylate:**

**late: 5r**

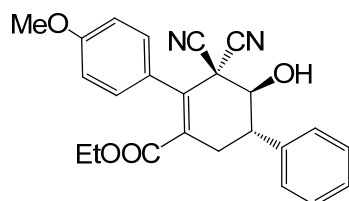

White solid,  $[\alpha]_{\text{D}}^{20} = -7$  ( $c=1.0$ ,  $\text{CHCl}_3$ ); mp 154 °C.  **$^1\text{H NMR}$**  (300 MHz,  $\text{CDCl}_3$ ):  $\delta$  7.33-7.43(m, 7 H), 6.94-6.97(dd,  $J = 1.8$  Hz, 6.6 Hz, 2 H), 4.52(d,  $J = 11.1$ Hz, 1 H), 3.89-3.96(dd,  $J = 7.2$  Hz, 14.1Hz, 2 H), 3.84(s, 3 H), 3.27-3.37(m, 1 H), 2.79-3.00(m, 2 H), 2.46(br, 1 H), 0.91(t,  $J = 7.2$  Hz, 3 H);  **$^{13}\text{C NMR}$**  (75 MHz,  $\text{CDCl}_3$ ):  $\delta$  166.8, 160.4, 137.1, 135.8, 130.8, 130.2, 129.6, 128.6, 128.1, 127.1, 114.0, 113.5, 112.5, 74.4, 61.5, 55.3, 47.3, 44.0, 34.6, 13.6.

**IR:**  $\nu$  3452, 2954, 2841, 2255, 1723, 1655, 1607, 1512, 1436, 1289, 1252, 1181, 1114, 1029, 912, 830, 733, 702  $\text{cm}^{-1}$ .

**HRMS-ESI ( $m/z$ ):** calcd for  $\text{C}_{24}\text{H}_{22}\text{N}_2\text{O}_4+\text{NH}_4^+$ : 420.1918; found: 420.1909, 2.1ppm.

**Major diastereomer:** ee was determined by HPLC analysis (Chiralcel OJ-H, *i*-PrOH/ Hexane = 5/95, 1.0 mL/min, 222 nm.) Retention time:  $t_{\text{major}} = 13.101$  min, ee > 99%.

**(4*S*,5*S*)-methyl 3,3-dicyano-4-hydroxy-5-isopropyl-2-(4-methoxyphenyl)cyclohex-1-enecarboxylate: 5s**

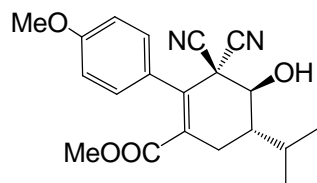

Colorless solid,  $[\alpha]_{\text{D}}^{20} = -6$  ( $c = 1.0$ ,  $\text{CHCl}_3$ ); mp 130 °C.  $^1\text{H NMR}$  (300 MHz,  $\text{CDCl}_3$ ):  $\delta$  7.24-7.29(m, 2 H), 6.90-6.94(m, 2 H), 4.60(s, 1 H), 3.83(s, 3 H), 3.48(s, 3 H), 3.14(br, 1 H), 2.34-2.68(m, 2.5 H), 1.72-1.85(m, 1.5 H), 1.01-1.06(m, 6 H);  $^{13}\text{C NMR}$  (75 MHz,  $\text{CDCl}_3$ ):  $\delta$  168.1, 160.1, 136.2, 129.9, 128.7, 127.9, 114.0, 113.5, 113.3, 73.7, 70.5, 55.2, 52.2, 46.2, 40.5, 29.0, 26.7, 20.3, 15.2.

**IR:**  $\nu$  3468, 2962, 2255, 1721, 1654, 1608, 1512, 1437, 1370, 1289, 1253, 1181, 1030, 972, 913, 831, 734  $\text{cm}^{-1}$ .

**HRMS-ESI ( $m/z$ ):** calcd for  $\text{C}_{20}\text{H}_{22}\text{N}_2\text{O}_4 + \text{H}^+$ : 355.1652; found: 355.1646, 1.7 ppm.

**Major diastereomer:** ee was determined by HPLC analysis (Chiralcel OD-H, *i*-PrOH/ Hexane = 5/95, 1.0 mL/min, 224 nm.) Retention time:  $t_{\text{major}} = 11.699$  min,  $t_{\text{minor}} = 25.162$  min, ee = 93%.

**(4*S*,5*S*)-methyl 2-(4-bromophenyl)-3,3-dicyano-4-hydroxy-5-isopropylcyclohex-1-enecarboxylate: 5t**

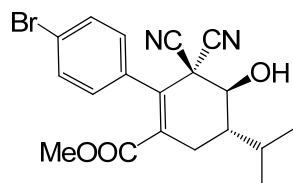

Colorless solid,  $[\alpha]_{\text{D}}^{20} = -8$  ( $c = 1.0$ ,  $\text{CHCl}_3$ ); mp 141 °C.  $^1\text{H NMR}$  (300 MHz,  $\text{CDCl}_3$ ):  $\delta$  7.54-7.58(m, 2 H), 7.19-7.24(m, 2 H), 4.16(d,  $J = 11.1$  Hz, 1 H), 3.49(s, 3 H), 3.05(br, 1 H), 2.35-2.64(m, 3 H), 2.10-2.21(m, 1 H), 1.04(d,  $J = 7.2$  Hz, 3 H), 0.95(d,  $J = 6.9$  Hz, 3 H);  $^{13}\text{C NMR}$  (75 MHz,  $\text{CDCl}_3$ ):  $\delta$  167.1, 136.7, 133.9, 132.0, 130.1, 129.8, 124.0, 113.8, 112.6, 73.7, 52.4, 48.0, 40.3, 26.4, 25.6, 20.0, 15.2.

**IR:**  $\nu$  3467, 2961, 2255, 1724, 1654, 1587, 1487, 1435, 1393, 1256, 1107, 1071, 1010, 911, 818, 731  $\text{cm}^{-1}$ .

**HRMS-ESI** ( $m/z$ ): calcd for  $C_{19}H_{19}BrN_2O_3+H^+$ : 403.0652; found: 403.0642, 2.5ppm.

**Major diastereomer:** ee was determined by HPLC analysis (Chiralcel OD-H, *i*-PrOH/ Hexane = 5/95, 1.0 mL/min, 218 nm.) Retention time:  $t_{\text{major}}=7.921$  min,  $t_{\text{minor}}=12.481$  min, ee = 96%.

## 5.0 References.

- (1). Marigo, M.; Wabnitz, T. C.; Fielenbach, D.; Jørgensen, K. A. *Angew. Chem. Int. Ed.* **2005**, *44*, 794.

### 6.0 X-Ray structure of 5i

(4*S*,5*S*)-ethyl 2-(4-chlorophenyl)-3,3-dicyano-4-hydroxy-5-isopropylcyclohex-1-enecarboxylate: **5i** (CCDC 825720).

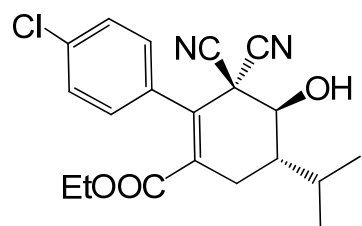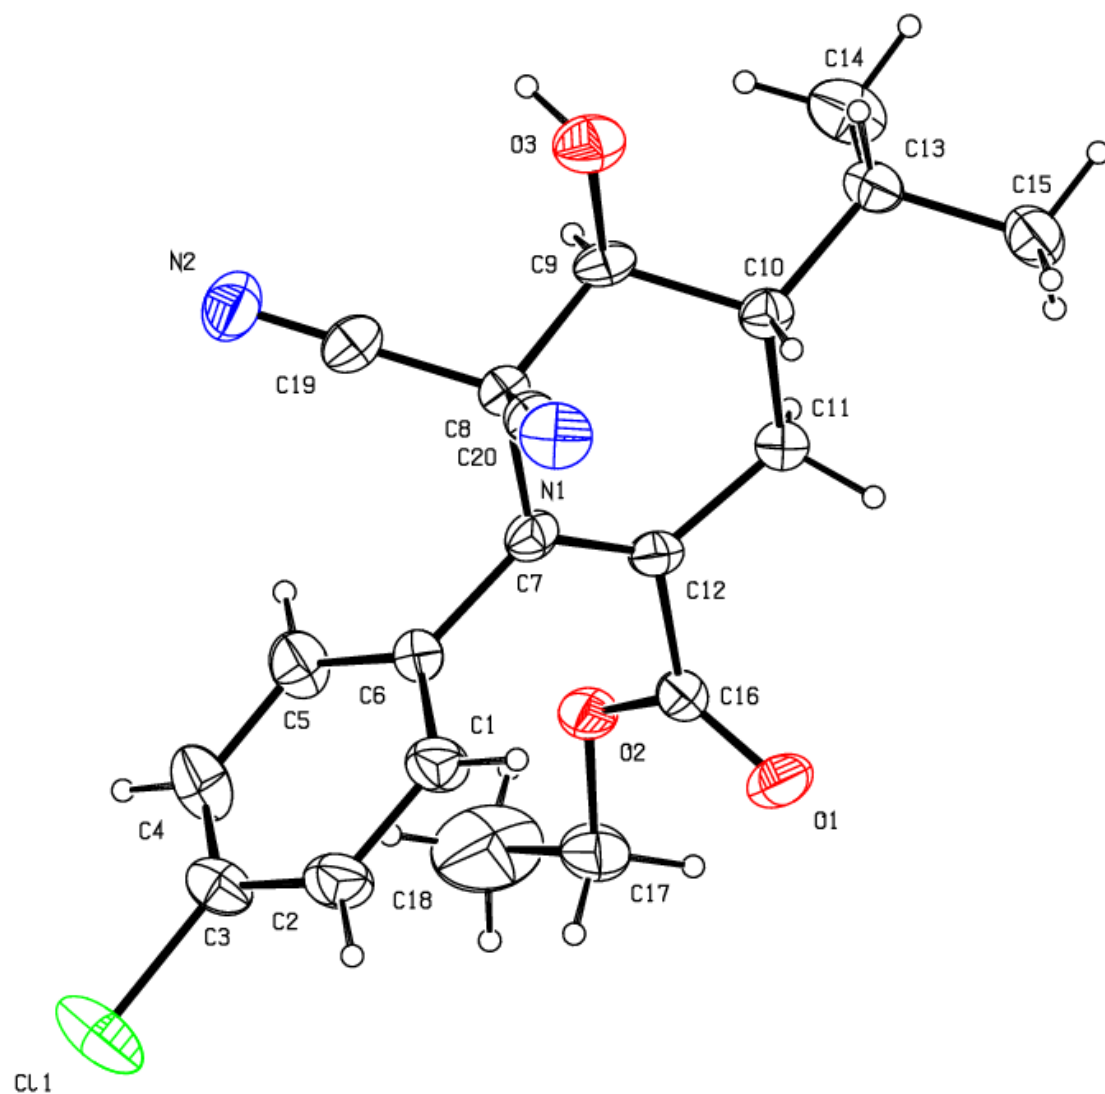

## 7.0. Copies of HPLC spectra of racemic/chiral products

(4*S*,5*S*)-ethyl 3,3-dicyano-4-hydroxy-5-isopropyl-2-(4-methoxyphenyl)cyclohex-1-enecarboxy

late: 5a

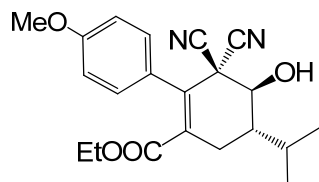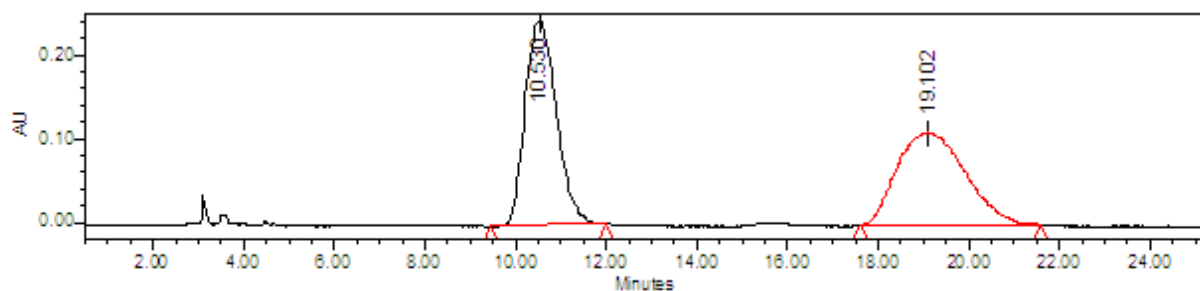

| Entry | Retention Time | Area (%) | Int Type | Peak Type |
|-------|----------------|----------|----------|-----------|
| 1     | 10.530         | 50.35    | bb       | Unknown   |
| 2     | 19.102         | 49.65    | bb       | Unknown   |

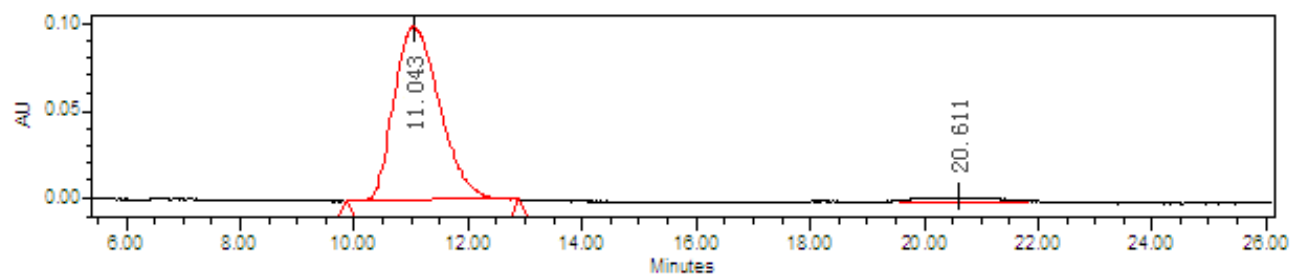

| Entry | Retention Time | Area (%) | Int Type | Peak Type |
|-------|----------------|----------|----------|-----------|
| 1     | 11.043         | 98.34    | bb       | Unknown   |
| 2     | 20.611         | 1.66     | bb       | Unknown   |

(4*S*,5*S*)-ethyl 3,3-dicyano-4-hydroxy-5-isopropyl-2-phenylcyclohex-1-enecarboxylate: **5b**

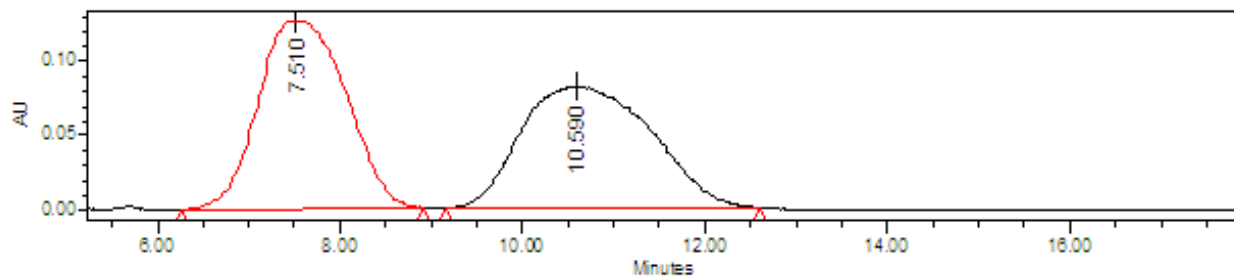

| Entry | Retention Time | Area (%) | Int Type | Peak Type |
|-------|----------------|----------|----------|-----------|
| 1     | 7.510          | 50.82    | bb       | Unknown   |
| 2     | 10.590         | 49.18    | bb       | Unknown   |

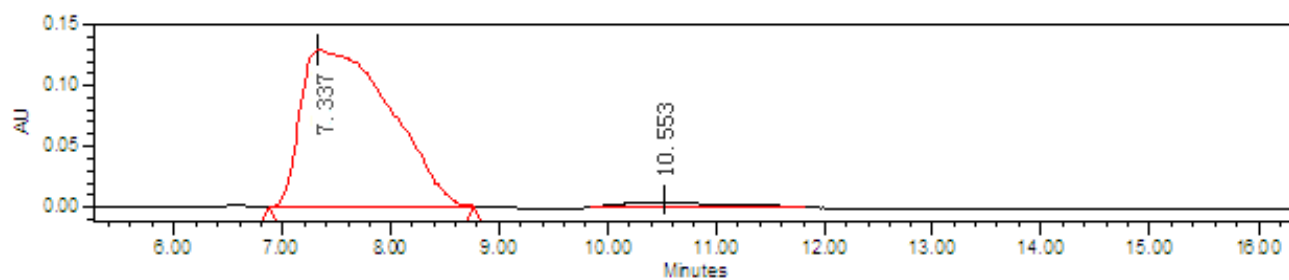

| Entry | Retention Time | Area (%) | Int Type | Peak Type |
|-------|----------------|----------|----------|-----------|
| 1     | 7.337          | 98.41    | bb       | Unknown   |
| 2     | 10.553         | 1.59     | bb       | Unknown   |

**(4*S*,5*S*)-ethyl 3,3-dicyano-4-hydroxy-5-isopropyl-2-(naphthalen-1-yl)cyclohex-1-enecarboxy**

late: 5c

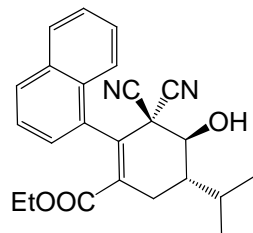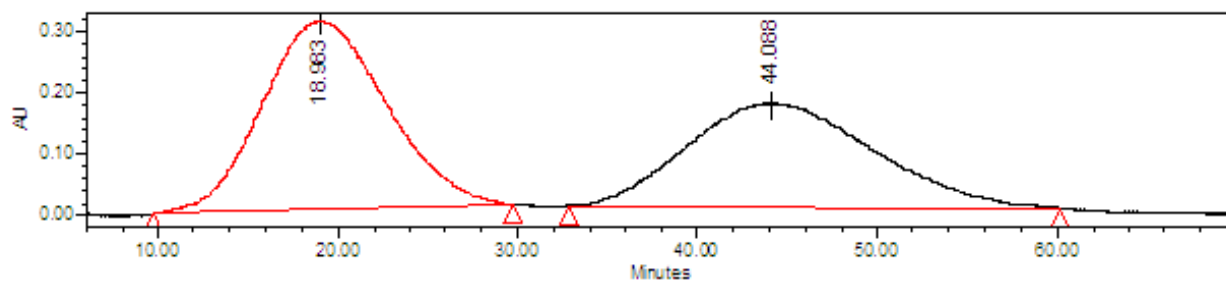

| Entry | Retention Time | Area (%) | Int Type | Peak Type |
|-------|----------------|----------|----------|-----------|
| 1     | 18.983         | 54.89    | bb       | Unknown   |
| 2     | 44.088         | 45.11    | bb       | Unknown   |

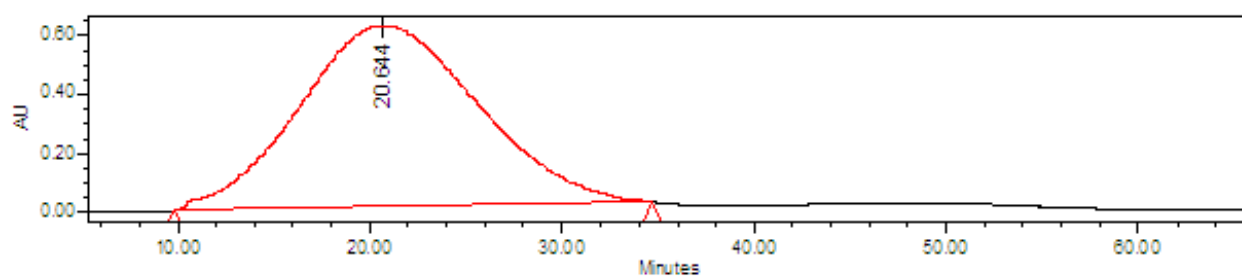

| Entry | Retention Time | Area (%) | Int Type | Peak Type |
|-------|----------------|----------|----------|-----------|
| 1     | 20.644         | 100.00   | bb       | Unknown   |
| 2     |                |          |          |           |



**(4*S*,5*S*)-ethyl 3,3-dicyano-4-hydroxy-5-isopropyl-2-*p*-tolylcyclohex-1-enecarboxylate: 5d**

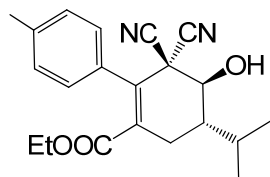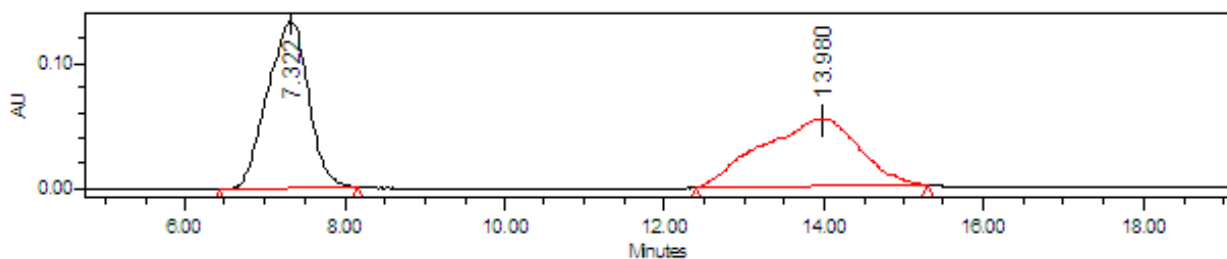

| Entry | Retention Time | Area (%) | Int Type | Peak Type |
|-------|----------------|----------|----------|-----------|
| 1     | 7.322          | 50.65    | bb       | Unknown   |
| 2     | 13.980         | 49.35    | bb       | Unknown   |

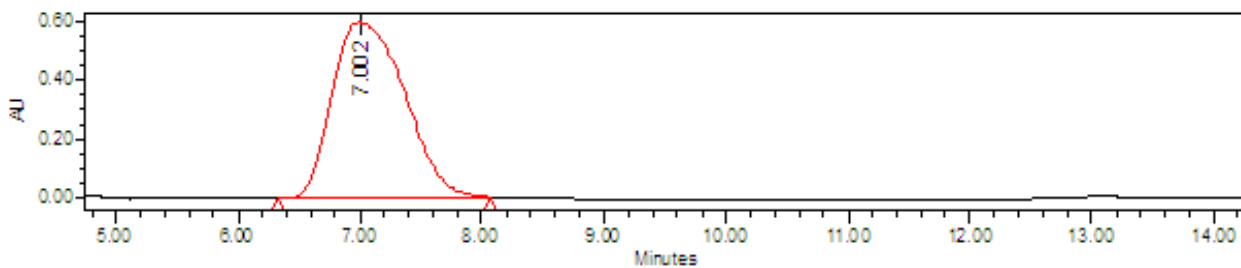

| Entry | Retention Time | Area (%) | Int Type | Peak Type |
|-------|----------------|----------|----------|-----------|
| 1     | 7.002          | 100.00   | bb       | Unknown   |
| 2     |                |          |          |           |

**(4*S*,5*S*)-ethyl 3,3-dicyano-4-hydroxy-5-isopropyl-2-(3-methoxyphenyl)cyclohex-1-enecarboxylate: 5e**

ylate: 5e

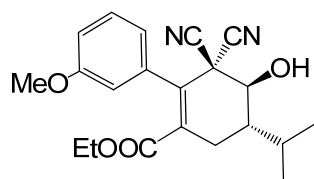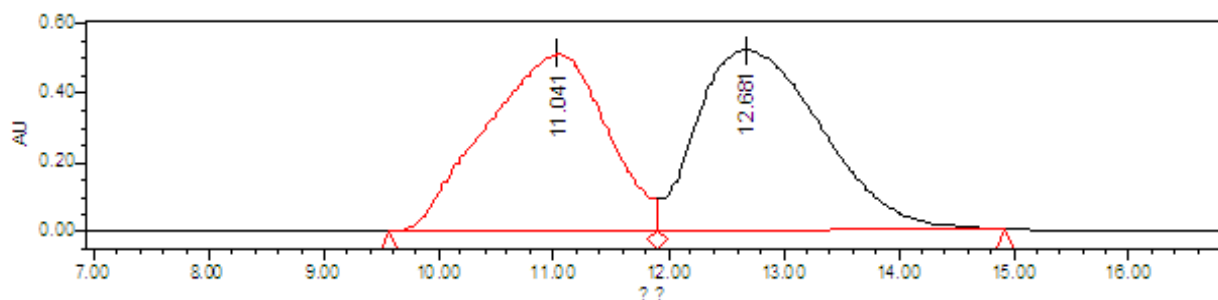

| Entry | Retention Time | Area (%) | Int Type | Peak Type |
|-------|----------------|----------|----------|-----------|
| 1     | 11.041         | 48.69    | bb       | Unknown   |
| 2     | 12.681         | 51.31    | bb       | Unknown   |

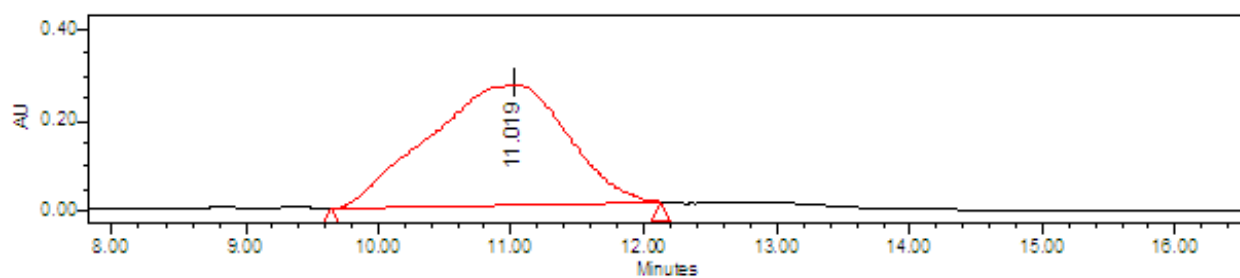

| Entry | Retention Time | Area (%) | Int Type | Peak Type |
|-------|----------------|----------|----------|-----------|
| 1     | 11.019         | 100.00   | bb       | Unknown   |
| 2     |                |          |          |           |

(4*S*,5*S*)-ethyl 3,3-dicyano-4-hydroxy-5-isopropyl-2-*m*-tolylcyclohex-1-enecarboxylate: **5f**

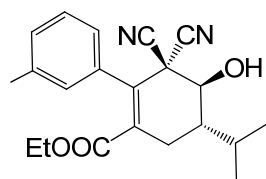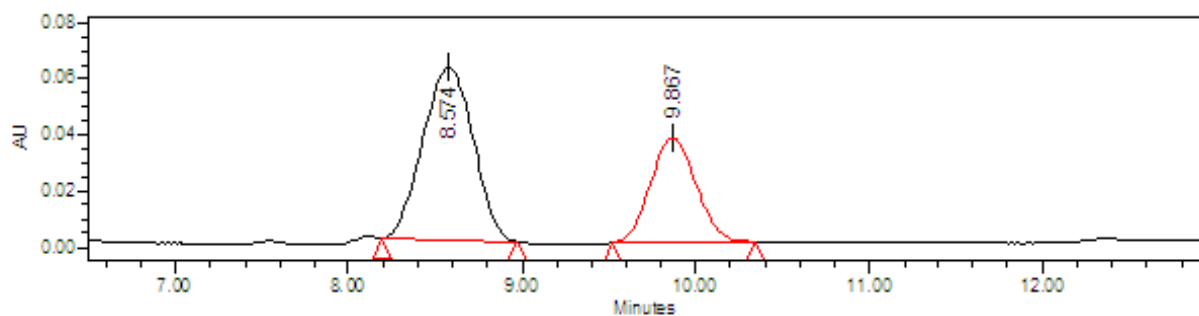

| Entry | Retention Time | Area (%) | Int Type | Peak Type |
|-------|----------------|----------|----------|-----------|
| 1     | 8.574          | 64.51    | bb       | Unknown   |
| 2     | 9.867          | 35.49    | bb       | Unknown   |

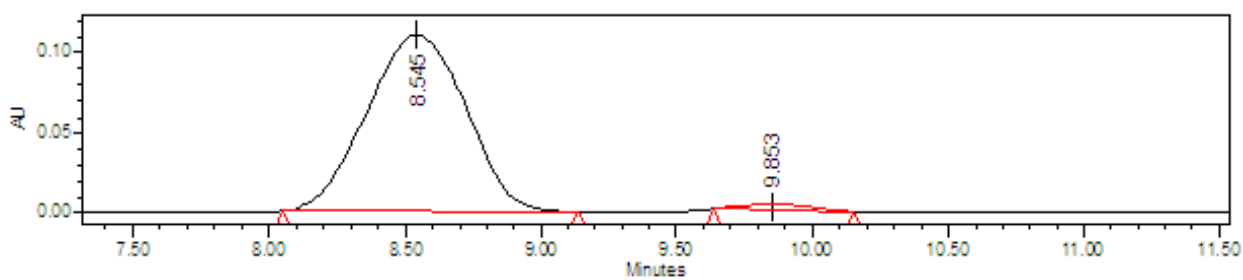

| Entry | Retention Time | Area (%) | Int Type | Peak Type |
|-------|----------------|----------|----------|-----------|
| 1     | 8.545          | 98.15    | bb       | Unknown   |
| 2     | 9.853          | 1.85     | bb       | Unknown   |

**(4*S*,5*S*)-ethyl 3,3-dicyano-4-hydroxy-5-isopropyl-2-*o*-tolylcyclohex-1-enecarboxylate: 5g**

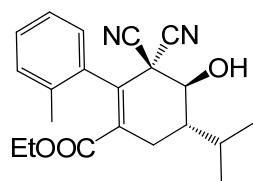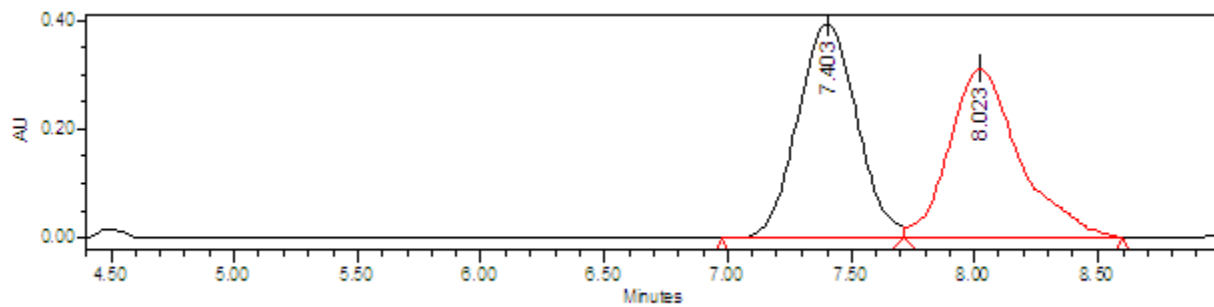

| Entry | Retention Time | Area (%) | Int Type | Peak Type |
|-------|----------------|----------|----------|-----------|
| 1     | 7.403          | 51.93    | bb       | Unknown   |
| 2     | 8.023          | 48.07    | bb       | Unknown   |

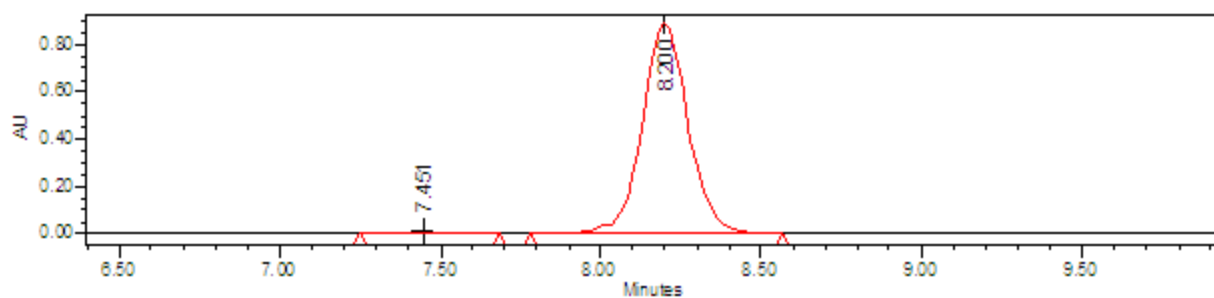

| Entry | Retention Time | Area (%) | Int Type | Peak Type |
|-------|----------------|----------|----------|-----------|
| 1     | 7.451          | 1.38     | bb       | Unknown   |
| 2     | 8.200          | 98.62    | bb       | Unknown   |

**(4*S*,5*S*)-ethyl 2-(4-bromophenyl)-3,3-dicyano-4-hydroxy-5-isopropylcyclohex-1-enecarboxylate**

te: 5h

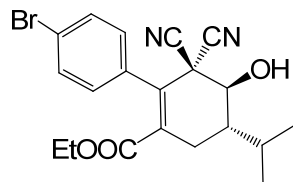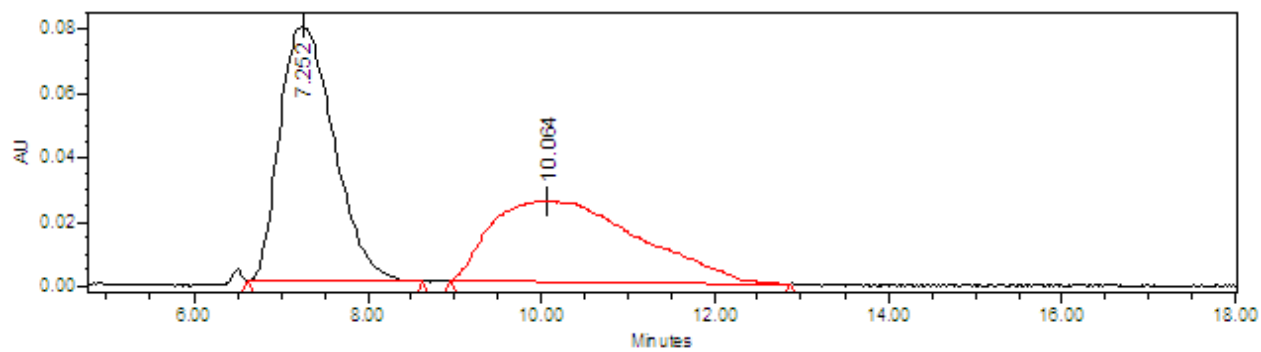

| Entry | Retention Time | Area (%) | Int Type | Peak Type |
|-------|----------------|----------|----------|-----------|
| 1     | 7.252          | 53.86    | bb       | Unknown   |
| 2     | 10.064         | 46.14    | bb       | Unknown   |

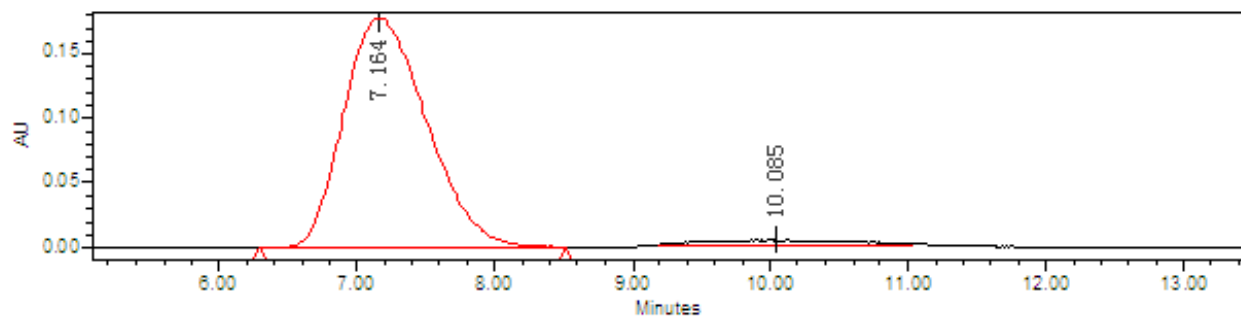

| Entry | Retention Time | Area (%) | Int Type | Peak Type |
|-------|----------------|----------|----------|-----------|
| 1     | 7.164          | 97.37    | bb       | Unknown   |
| 2     | 10.085         | 2.63     | bb       | Unknown   |

**(4*S*,5*S*)-ethyl 2-(4-chlorophenyl)-3,3-dicyano-4-hydroxy-5-isopropylcyclohex-1-enecarboxylate: 5i**

te: 5i

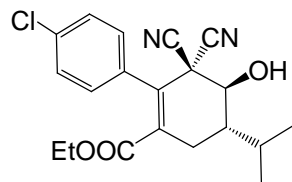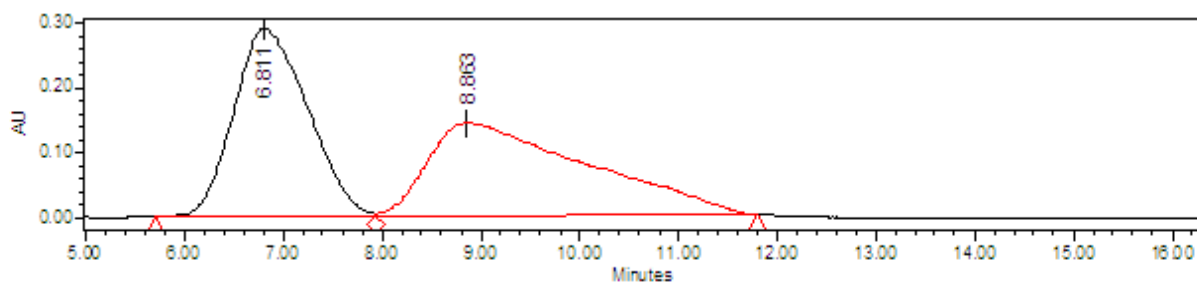

| Entry | Retention Time | Area (%) | Int Type | Peak Type |
|-------|----------------|----------|----------|-----------|
| 1     | 6.811          | 48.44    | bb       | Unknown   |
| 2     | 8.863          | 51.56    | bb       | Unknown   |

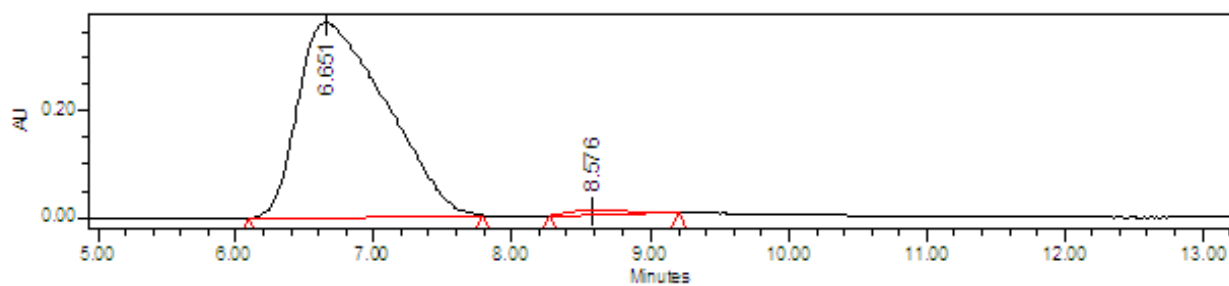

| Entry | Retention Time | Area (%) | Int Type | Peak Type |
|-------|----------------|----------|----------|-----------|
| 1     | 6.651          | 98.65    | bb       | Unknown   |
| 2     | 8.576          | 1.35     | bb       | Unknown   |

**(4S,5S)-ethyl 3,3-dicyano-2-(4-fluorophenyl)-4-hydroxy-5-isopropylcyclohex-1-enecarboxylate**

te: 5j

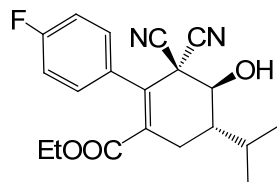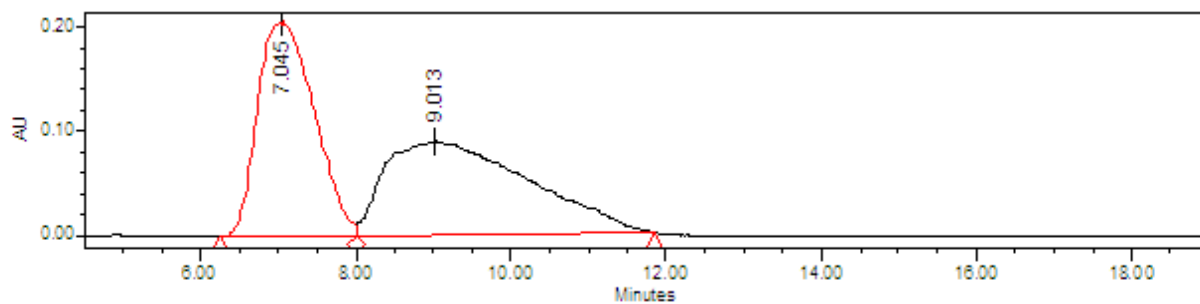

| Entry | Retention Time | Area (%) | Int Type | Peak Type |
|-------|----------------|----------|----------|-----------|
| 1     | 7.045          | 47.62    | bb       | Unknown   |
| 2     | 9.013          | 52.38    | bb       | Unknown   |

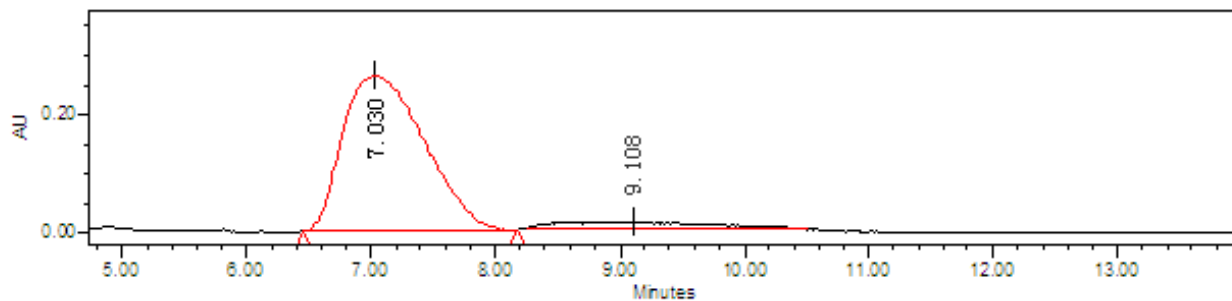

| Entry | Retention Time | Area (%) | Int Type | Peak Type |
|-------|----------------|----------|----------|-----------|
| 1     | 7.030          | 96.43    | bb       | Unknown   |
| 2     | 9.108          | 3.57     | bb       | Unknown   |

**(4S,5S)-ethyl 3,3-dicyano-4-hydroxy-5-isopropyl-2-(4-(trifluoromethyl)phenyl)cyclohex-1-en**

ecarboxylate: 5k

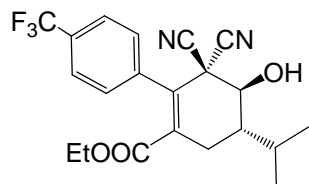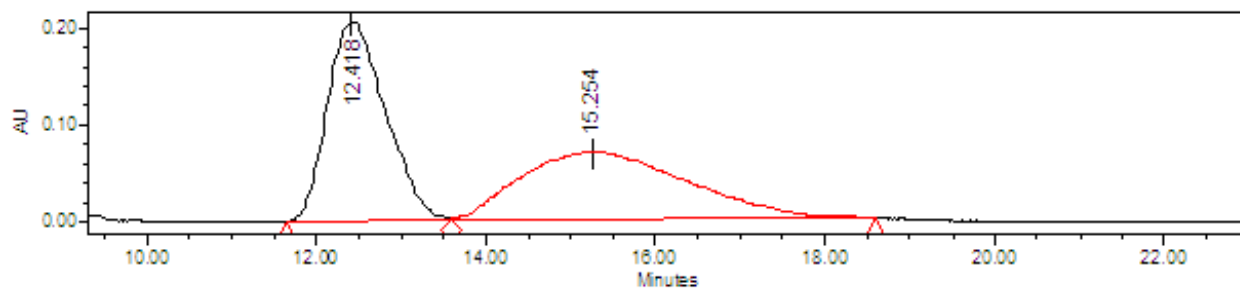

| Entry | Retention Time | Area (%) | Int Type | Peak Type |
|-------|----------------|----------|----------|-----------|
| 1     | 12.418         | 50.58    | bb       | Unknown   |
| 2     | 15.254         | 49.42    | bb       | Unknown   |

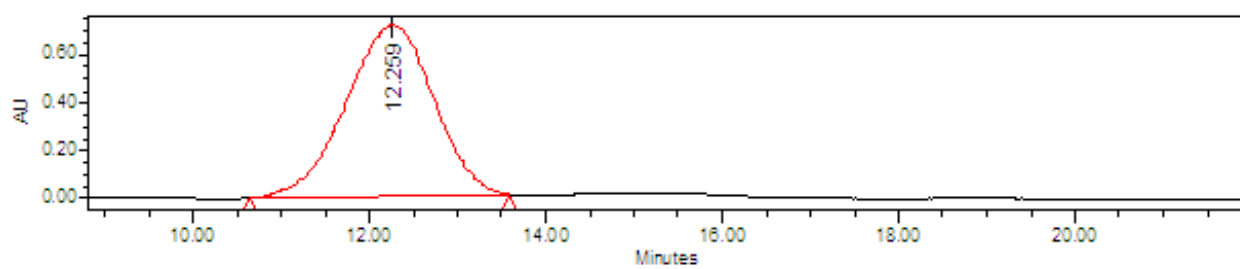

| Entry | Retention Time | Area (%) | Int Type | Peak Type |
|-------|----------------|----------|----------|-----------|
| 1     | 12.259         | 100.00   | bb       | Unknown   |
| 2     |                |          |          |           |



**(4S,5S)-ethyl 2-(3-bromophenyl)-3,3-dicyano-4-hydroxy-5-isopropylcyclohex-1-enecarboxyla**

te: 5l

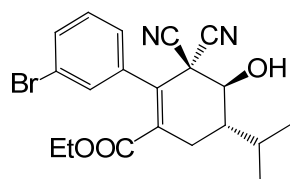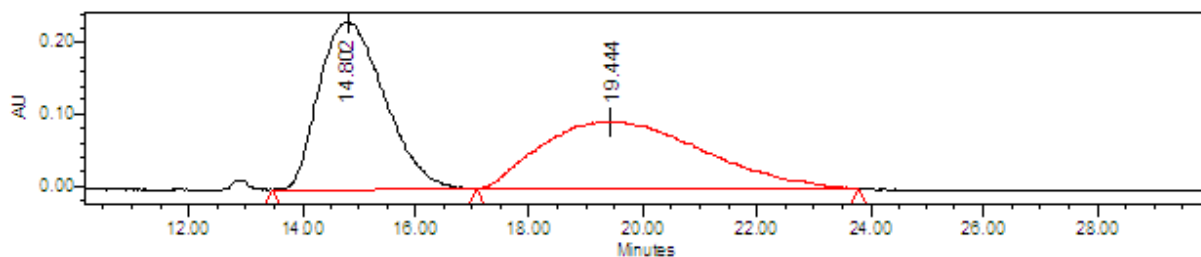

| Entry | Retention Time | Area (%) | Int Type | Peak Type |
|-------|----------------|----------|----------|-----------|
| 1     | 14.802         | 50.42    | bb       | Unknown   |
| 2     | 19.444         | 49.58    | bb       | Unknown   |

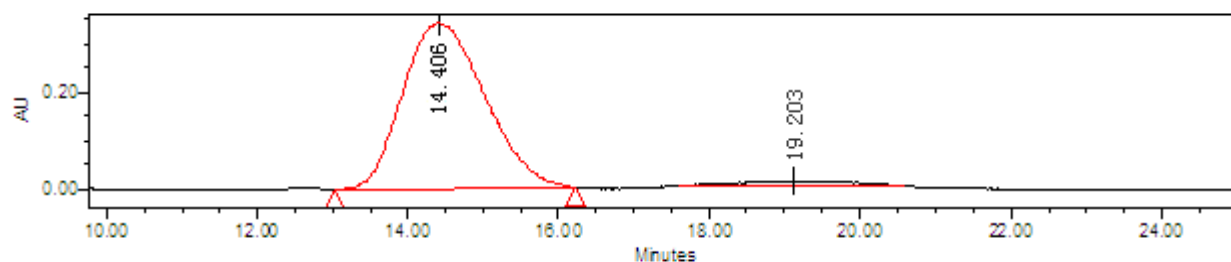

| Entry | Retention Time | Area (%) | Int Type | Peak Type |
|-------|----------------|----------|----------|-----------|
| 1     | 14.406         | 98.22    | bb       | Unknown   |
| 2     | 19.203         | 1.78     | bb       | Unknown   |

**(4*S*,5*S*)-ethyl 2-(3-chlorophenyl)-3,3-dicyano-4-hydroxy-5-isopropylcyclohex-1-enecarboxyla**

**te: 5m**

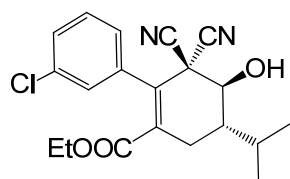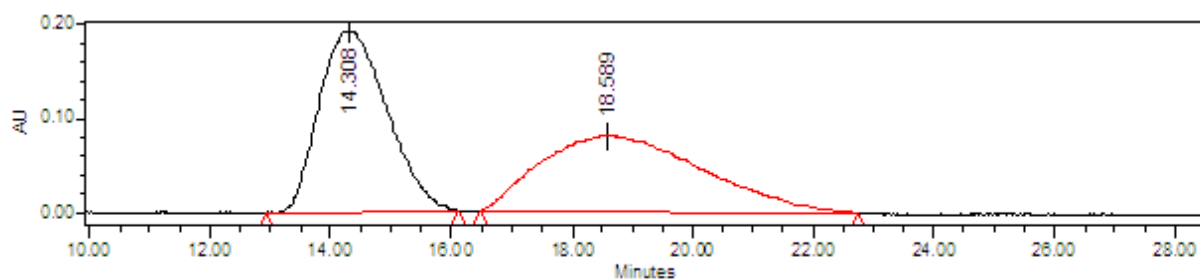

| Entry | Retention Time | Area (%) | Int Type | Peak Type |
|-------|----------------|----------|----------|-----------|
| 1     | 14.308         | 50.21    | bb       | Unknown   |
| 2     | 18.589         | 49.79    | bb       | Unknown   |

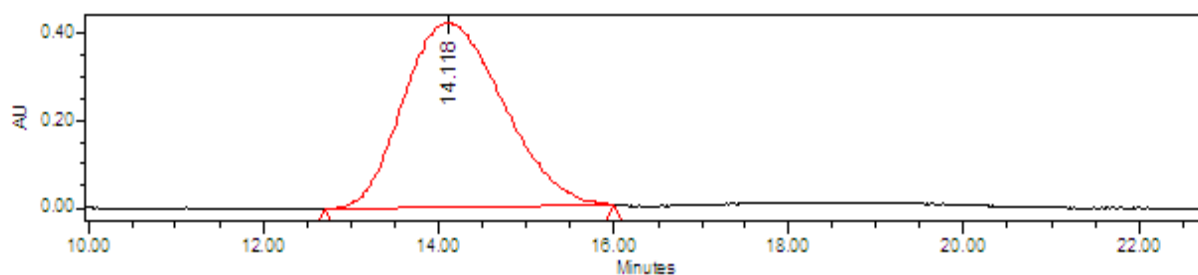

| Entry | Retention Time | Area (%) | Int Type | Peak Type |
|-------|----------------|----------|----------|-----------|
| 1     | 14.118         | 100.00   | bb       | Unknown   |
| 2     |                |          |          |           |

**(4*S*,5*S*)-ethyl 3,3-dicyano-2-(2-fluorophenyl)-4-hydroxy-5-isopropylcyclohex-1-enecarboxyla**

te: 5n

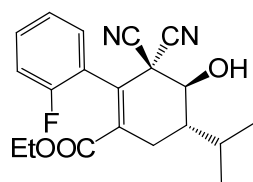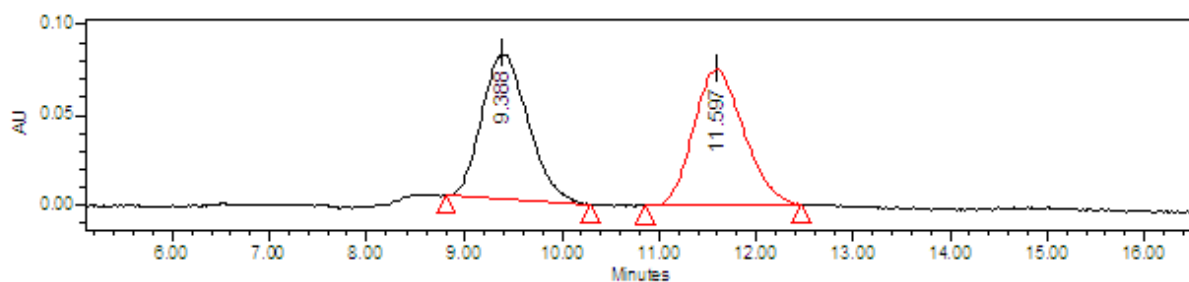

| Entry | Retention Time | Area (%) | Int Type | Peak Type |
|-------|----------------|----------|----------|-----------|
| 1     | 9.388          | 49.67    | bb       | Unknown   |
| 2     | 11.597         | 50.33    | bb       | Unknown   |

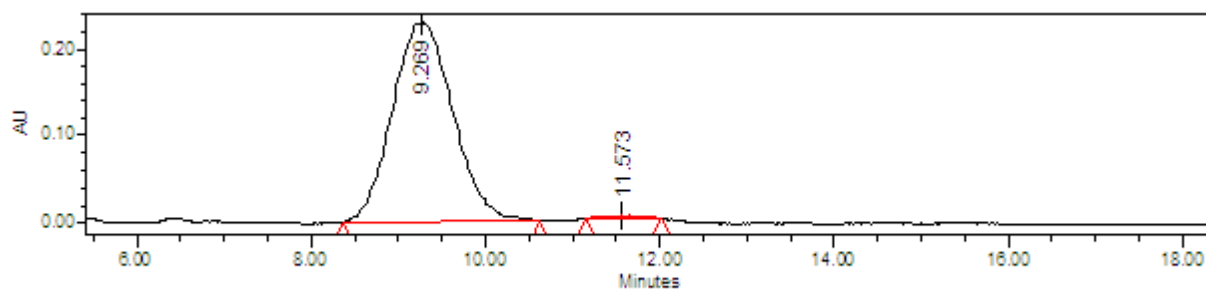

| Entry | Retention Time | Area (%) | Int Type | Peak Type |
|-------|----------------|----------|----------|-----------|
| 1     | 9.269          | 98.69    | bb       | Unknown   |
| 2     | 11.573         | 1.31     | bb       | Unknown   |

**(4*S*,5*S*)-ethyl 3,3-dicyano-2-(furan-2-yl)-4-hydroxy-5-isopropylcyclohex-1-enecarboxylate: 5o**

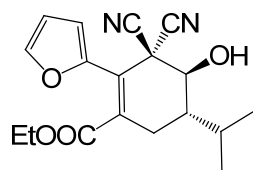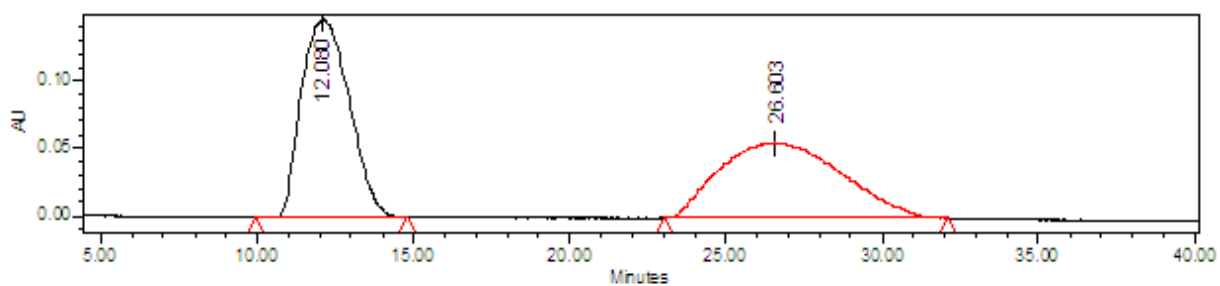

| Entry | Retention Time | Area (%) | Int Type | Peak Type |
|-------|----------------|----------|----------|-----------|
| 1     | 12.080         | 50.00    | bb       | Unknown   |
| 2     | 26.603         | 50.00    | bb       | Unknown   |

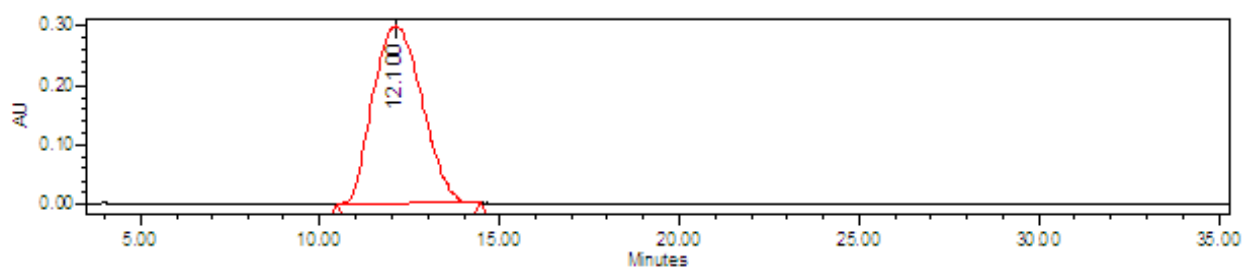

| Entry | Retention Time | Area (%) | Int Type | Peak Type |
|-------|----------------|----------|----------|-----------|
| 1     | 12.100         | 100.00   | bb       | Unknown   |
| 2     |                |          |          |           |

**(4*S*,5*S*)-ethyl 3,3-dicyano-4-hydroxy-5-isopropyl-2-(thiophen-2-yl)cyclohex-1-enecarboxylate:**

**5p**

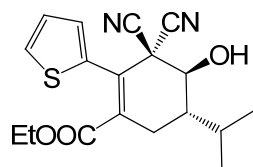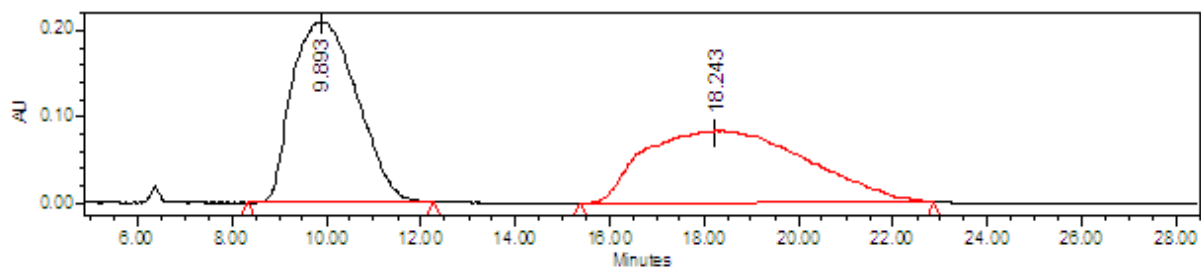

| Entry | Retention Time | Area (%) | Int Type | Peak Type |
|-------|----------------|----------|----------|-----------|
| 1     | 9.893          | 50.07    | bb       | Unknown   |
| 2     | 18.243         | 49.93    | bb       | Unknown   |

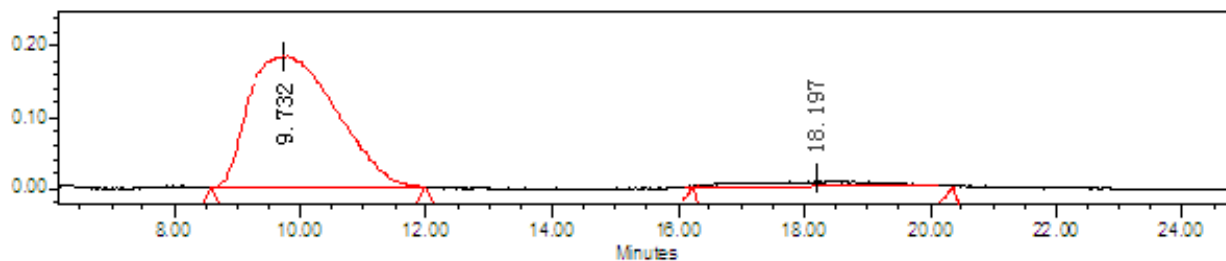

| Entry | Retention Time | Area (%) | Int Type | Peak Type |
|-------|----------------|----------|----------|-----------|
| 1     | 9.735          | 98.66    | bb       | Unknown   |
| 2     | 18.197         | 1.34     | bb       | Unknown   |

**(4*S*,5*R*)-ethyl 3,3-dicyano-5-ethyl-4-hydroxy-2-(4-methoxyphenyl)cyclohex-1-enecarboxylate:**

**5q**

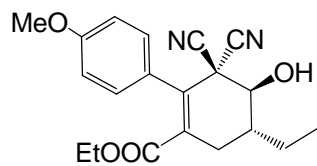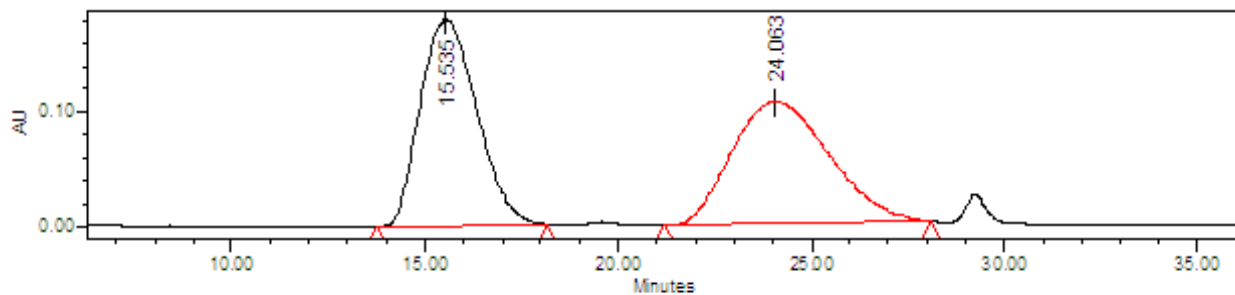

| Entry | Retention Time | Area (%) | Int Type | Peak Type |
|-------|----------------|----------|----------|-----------|
| 1     | 15.535         | 49.61    | bb       | Unknown   |
| 2     | 24.063         | 50.39    | bb       | Unknown   |

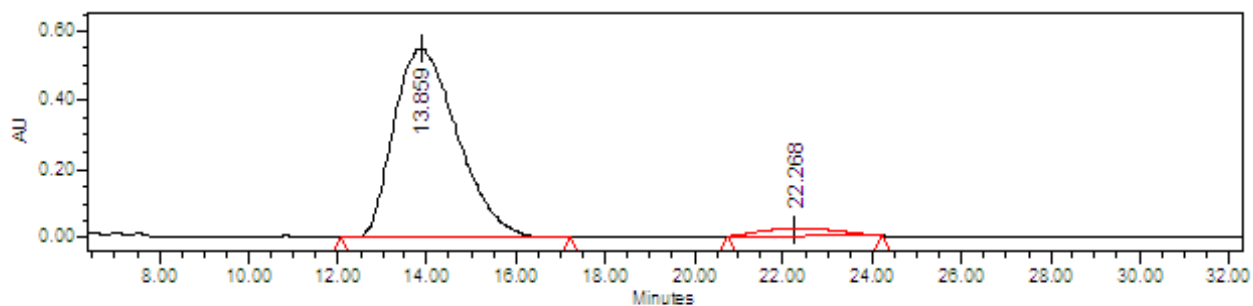

| Entry | Retention Time | Area (%) | Int Type | Peak Type |
|-------|----------------|----------|----------|-----------|
| 1     | 13.859         | 95.98    | bb       | Unknown   |
| 2     | 22.268         | 4.02     | bb       | Unknown   |

**(4*S*,5*S*)-methyl 3,3-dicyano-4-hydroxy-5-isopropyl-2-(4-methoxyphenyl)cyclohex-1-enecarbo**

**xylate: 5s**

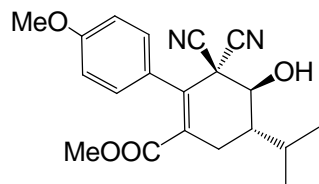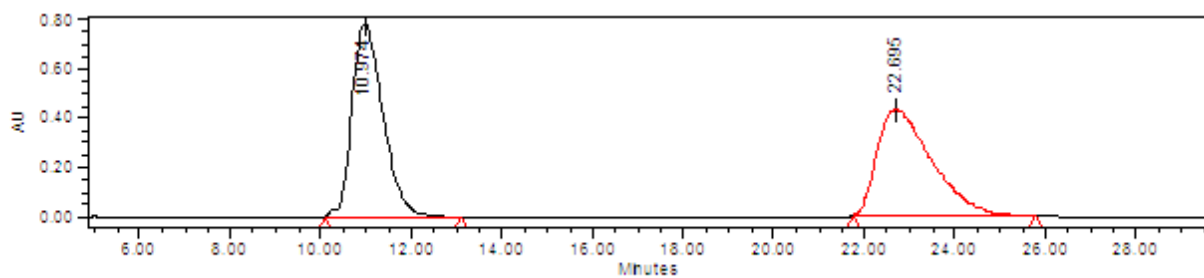

| Entry | Retention Time | Area (%) | Int Type | Peak Type |
|-------|----------------|----------|----------|-----------|
| 1     | 10.974         | 50.53    | bb       | Unknown   |
| 2     | 22.695         | 49.47    | bb       | Unknown   |

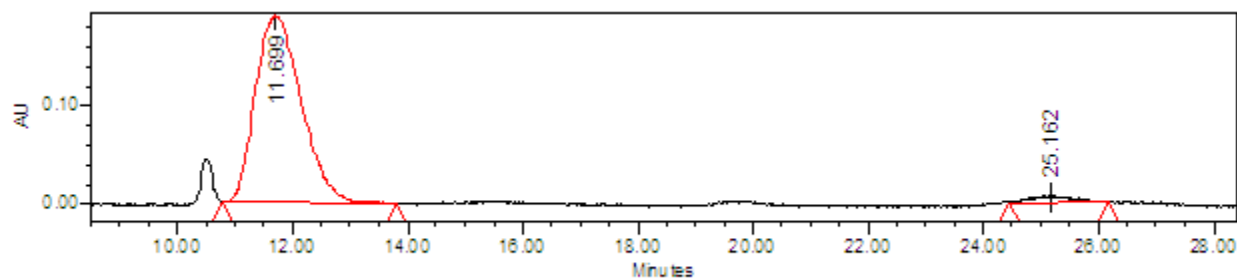

| Entry | Retention Time | Area (%) | Int Type | Peak Type |
|-------|----------------|----------|----------|-----------|
| 1     | 11.699         | 96.51    | bb       | Unknown   |
| 2     | 25.162         | 3.49     | bb       | Unknown   |

**(4*S*,5*S*)-methyl 2-(4-bromophenyl)-3,3-dicyano-4-hydroxy-5-isopropylcyclohex-1-enecarboxy**

late: 5t

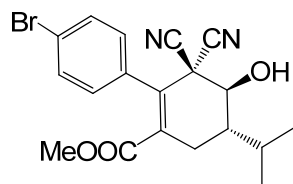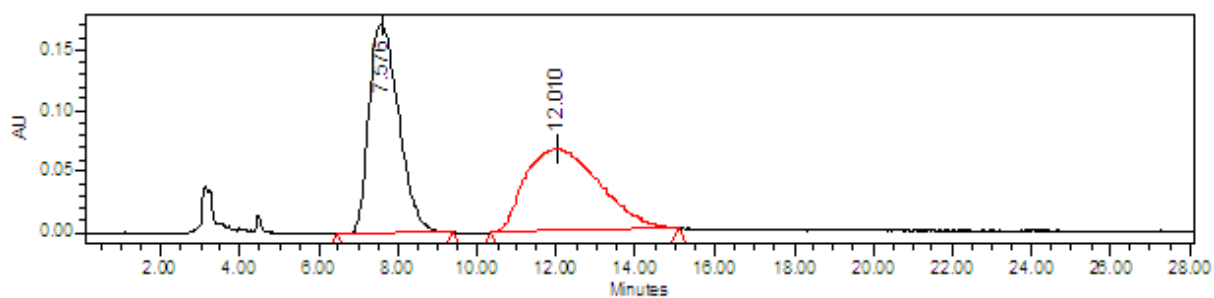

| Entry | Retention Time | Area (%) | Int Type | Peak Type |
|-------|----------------|----------|----------|-----------|
| 1     | 7.576          | 50.50    | bb       | Unknown   |
| 2     | 12.010         | 49.50    | bb       | Unknown   |

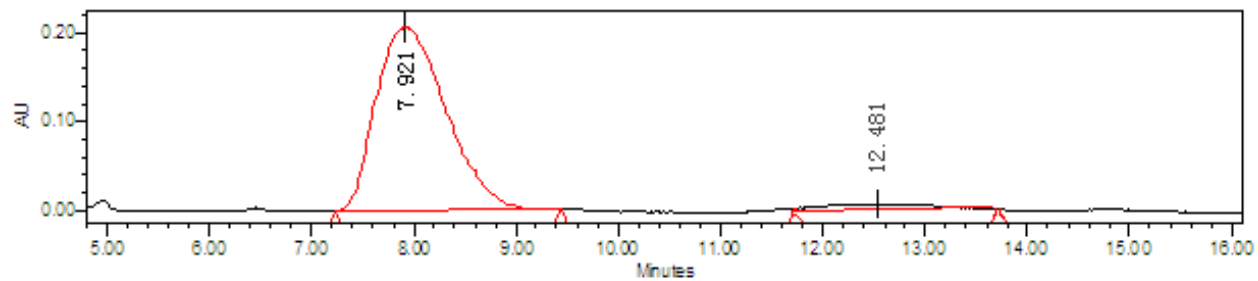

| Entry | Retention Time | Area (%) | Int Type | Peak Type |
|-------|----------------|----------|----------|-----------|
| 1     | 7.921          | 97.89    | bb       | Unknown   |
| 2     | 12.481         | 2.11     | bb       | Unknown   |



## 8.0 Copies of NMR spectra of products

### Ethyl 4,4-dicyano-3-(4-methoxyphenyl)-2-methylenebut-3-enoate: 3a

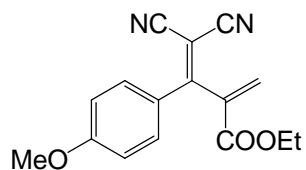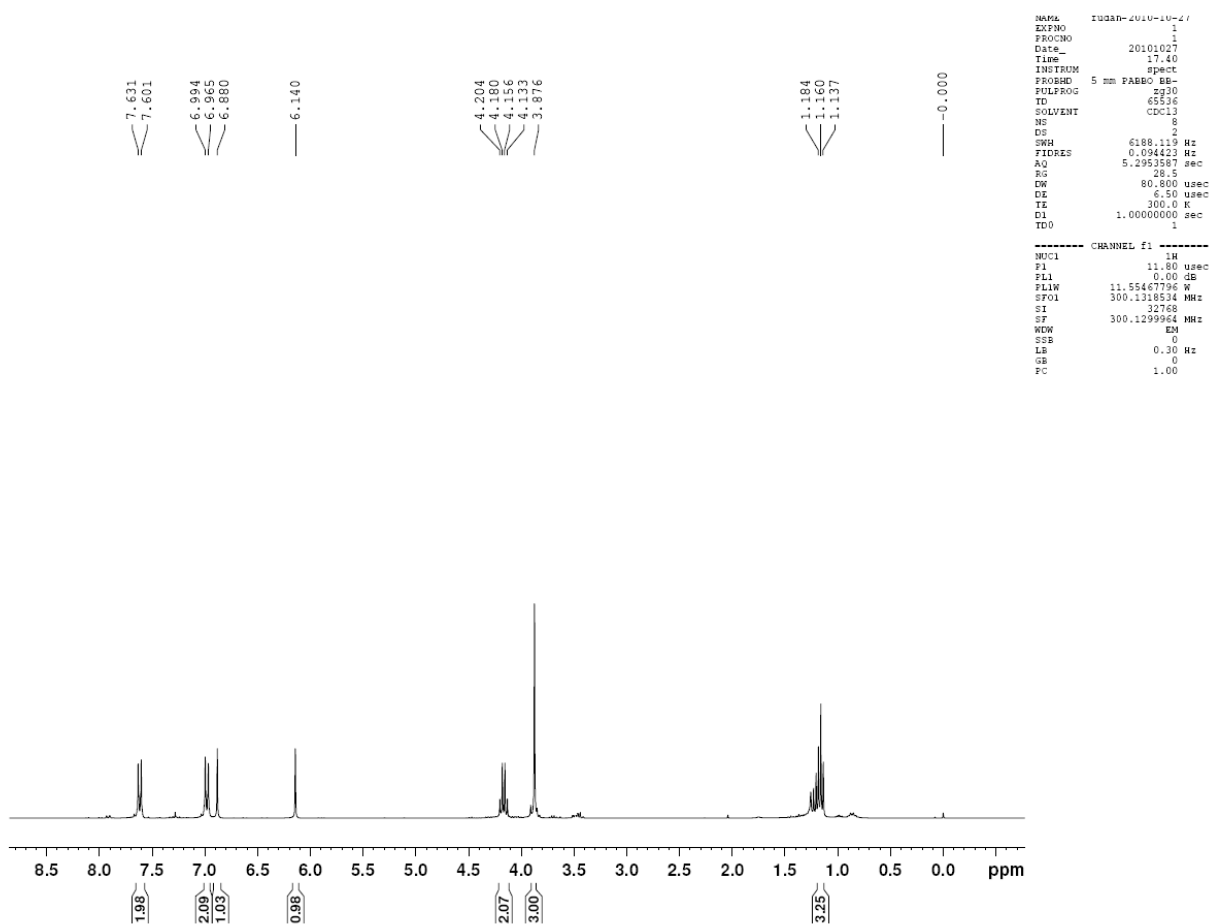

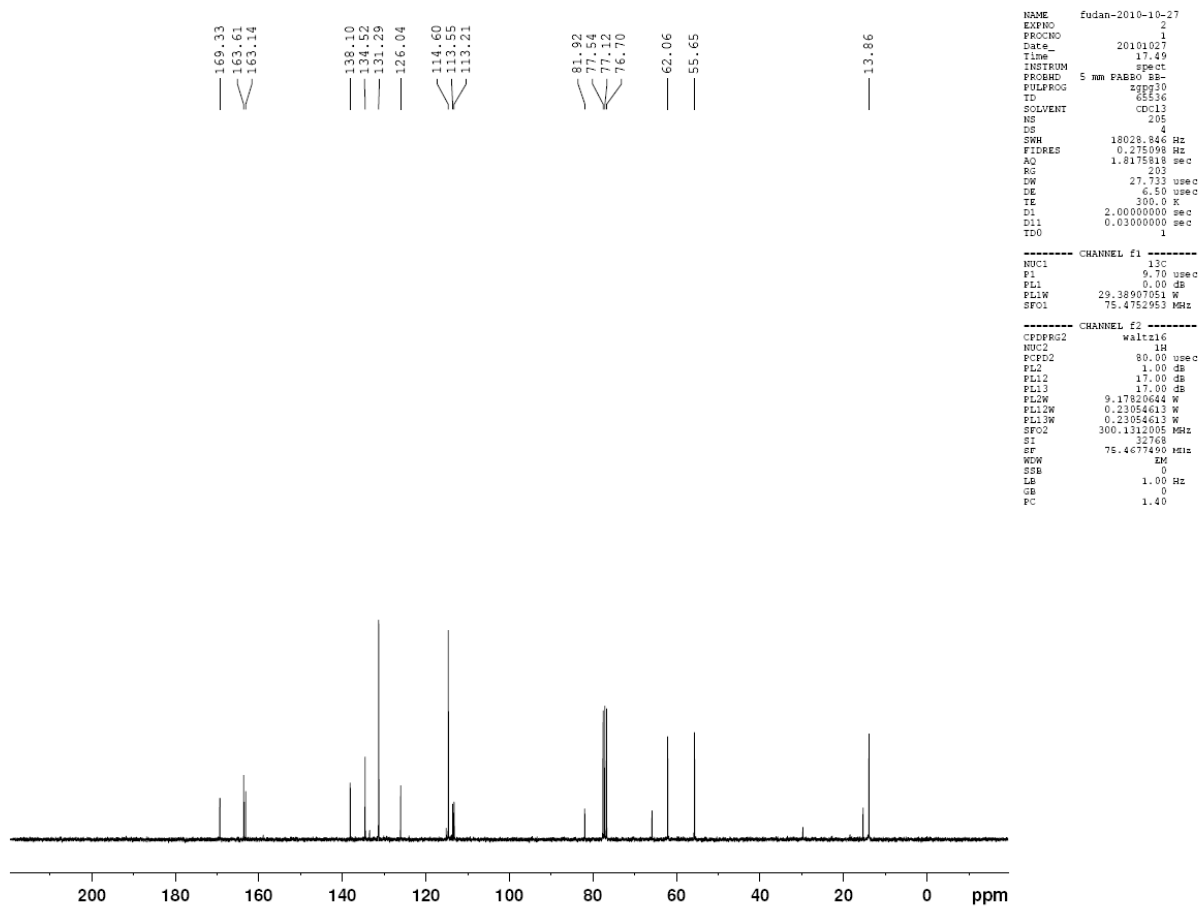

### Ethyl 4,4-dicyano-2-methylene-3-phenylbut-3-enoate: **3b**

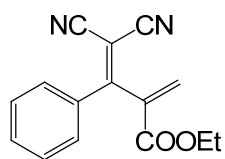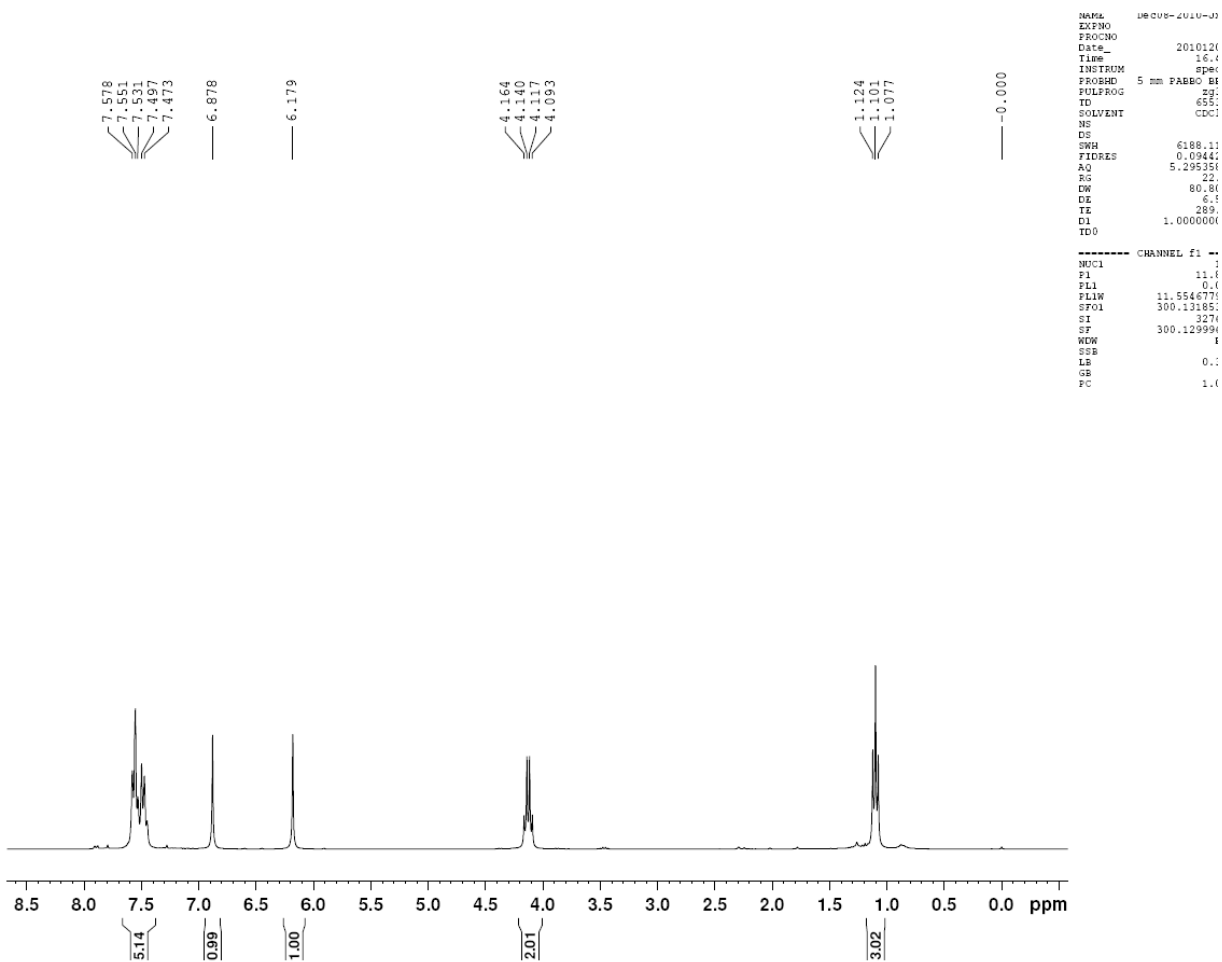

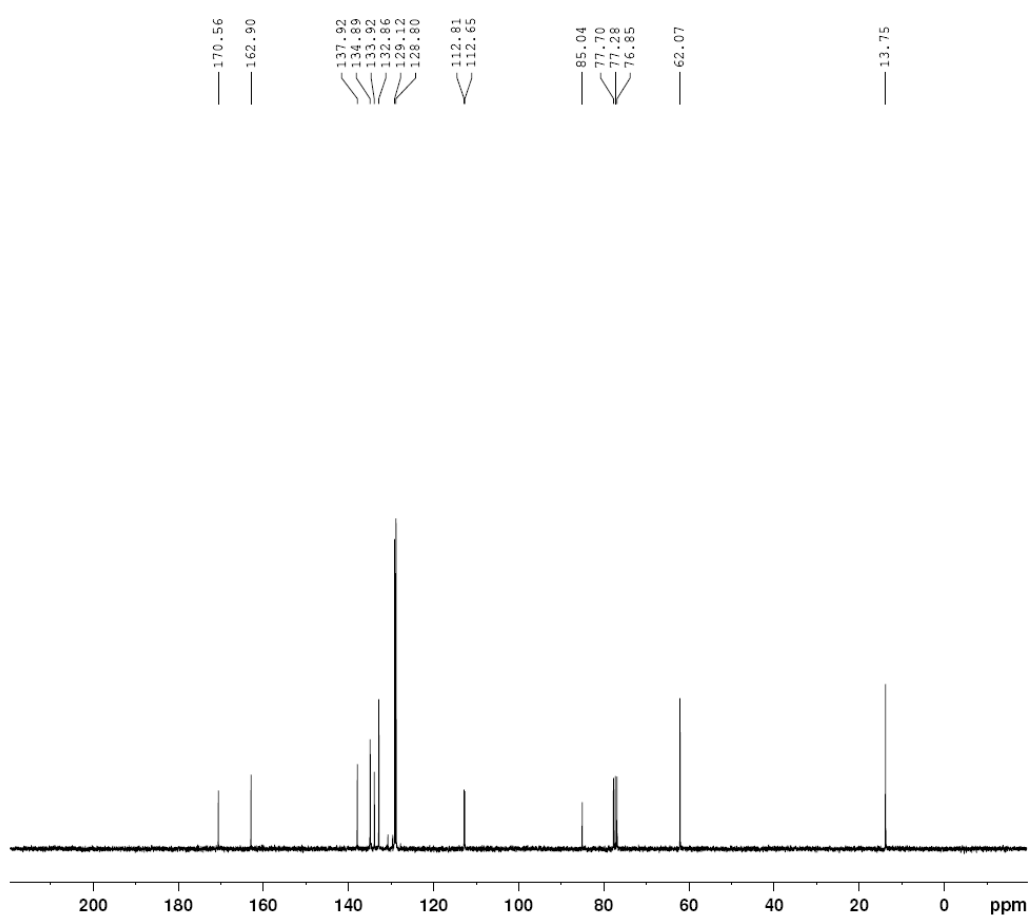

```
NAME      Dec08-2010-Jxy1
EXPNO     2
PROCNO    1
DATE_     20101208
Time      16.48
INSTRUM   spect
PROBHD    5 mm PABBO 5B-
PULPROG   zgpg30
TD         65536
SOLVENT   cdcl3
NS         87
DS         4
SWH        18028.846 Hz
FIDRES     0.275098 Hz
AQ         1.8175818 sec
RG         203
DW         27.733 usec
DE         6.50 usec
TE         290.2 K
D1         2.00000000 sec
D11        0.03000000 sec
TD0        1

----- CHANNEL f1 -----
NUC1       13C
P1         9.70 usec
PL1        0.00 dB
PL1W       29.38907051 W
SFO1       75.4752953 MHz

----- CHANNEL f2 -----
CDEPRG2    waltz16
NUC2       1H
PCPD2      80.00 usec
PL2        1.00 dB
PL12       17.00 dB
PL13       17.00 dB
PL2W       9.17829644 W
PL12W      0.23054613 W
PL13W      0.23054613 W
SFO2       300.1312005 MHz
SI         32768
SF         75.4677490 MHz
WDW        EM
SFE        0
LB         1.00 Hz
GB         0
PC         1.40
```

### Ethyl 4,4-dicyano-2-methylene-3-(naphthalen-1-yl)but-3-enoate: **3c**

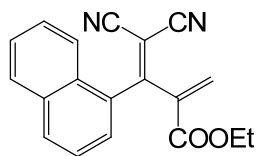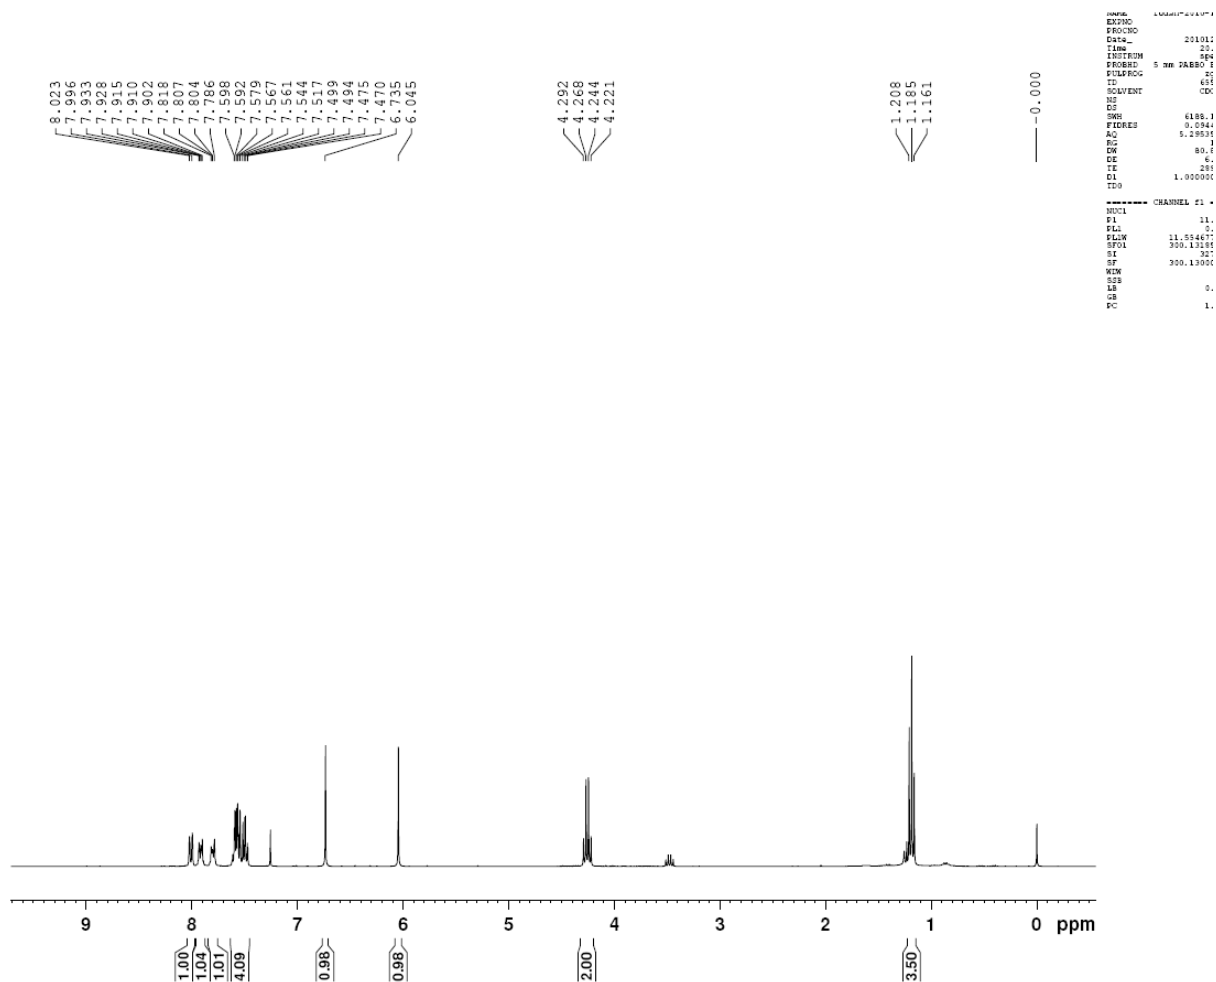

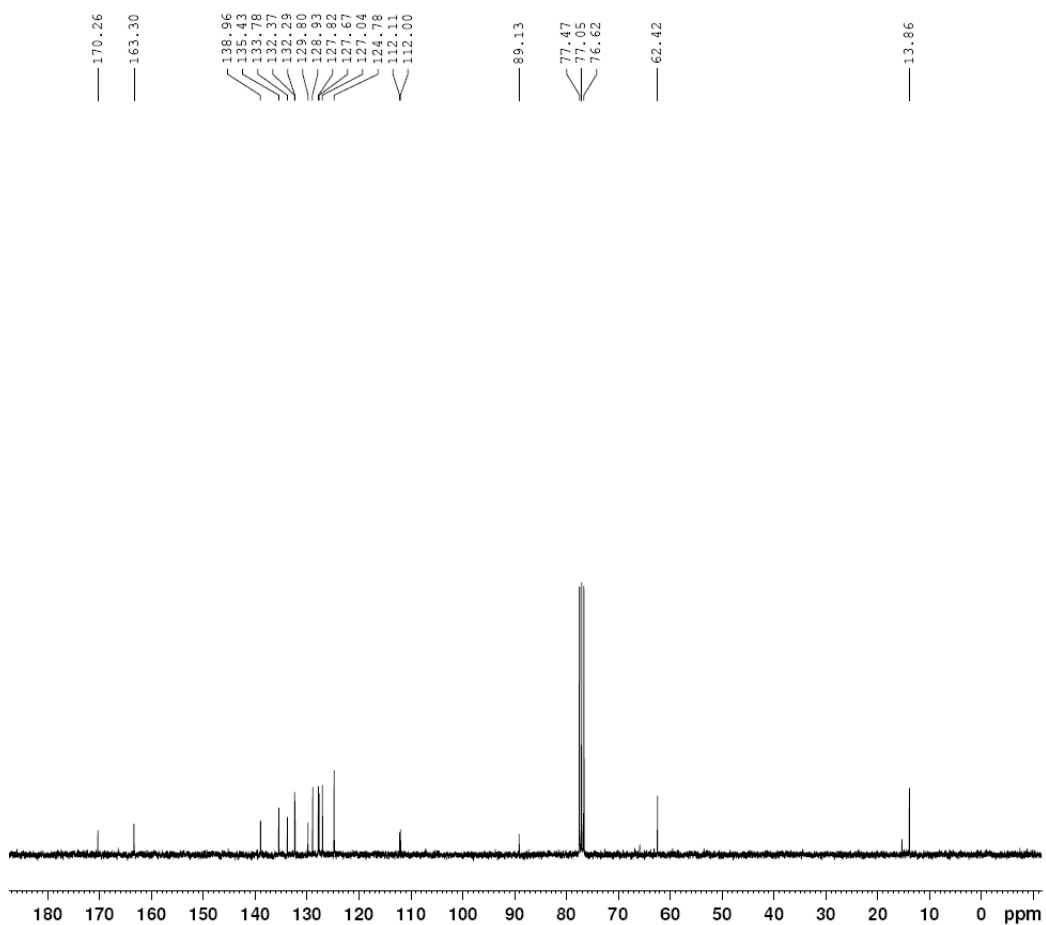

```
NAME Fudan-2010-12-20-1-mal-  
EXPNO 1  
PROCNO 1  
F4-- 20101221  
F2-- 8.52  
INSTRUM spect  
PROBHD 5 mm PABBO-BB-  
PULPROG zgpg30  
TD 65536  
F0 0.000000  
SOLVENT CDCl3  
NS 164  
DS 4  
SWH 18028.844 Hz  
FIDRES 0.275898 Hz  
AQ 1.1875818 sec  
RG 27.752 usec  
IN 27.752 usec  
DE 6.50 usec  
TE 298.2 K  
D1 2.0000000 sec  
S1 0.0300000 sec  
TD0  
----- CHANNEL f1 -----  
NUC1 13C  
P1 8.70 usec  
PL1 0.00 dB  
PL1X 29.3897051 MHz  
SFO1 75.4752993 MHz  
----- CHANNEL f2 -----  
CF2PRG2 waltz16  
NUC2 1H  
PCPD2 80.00 usec  
PL2 1.00 dB  
PL12 17.00 dB  
PL13 17.00 dB  
PL1X 9.17828443 MHz  
PL1XK 0.23054413 MHz  
PL1XW 0.23054413 MHz  
SFO2 300.1312015 MHz  
H1 12748  
SF 75.4677420 MHz  
WDW EM  
SSB 0  
LB 1.00 Hz  
GB 0  
PC 1.40
```

### Ethyl 4,4-dicyano-2-methylene-3-p-tolylbut-3-enoate: 3d

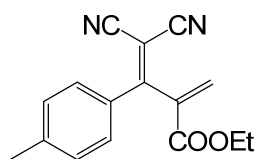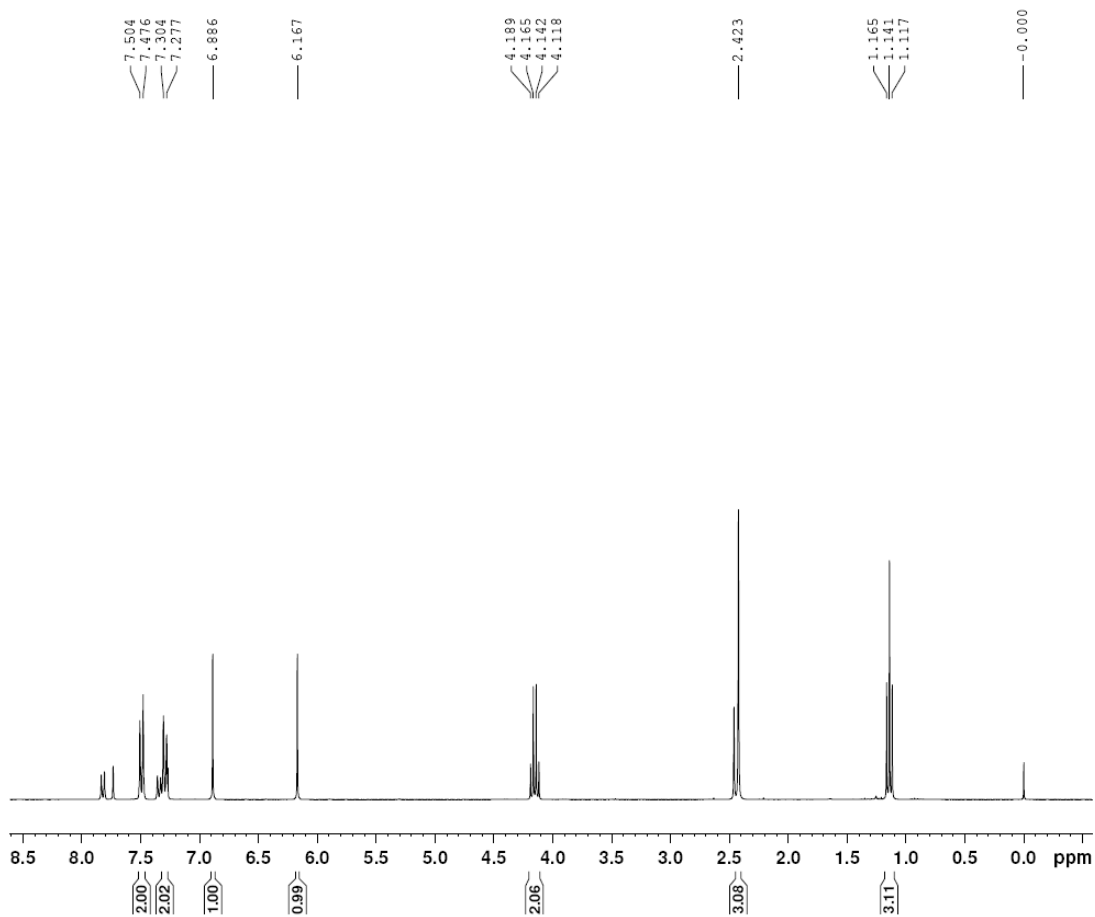

```
NAME      E033h-2011-2-2-01
EXPNO     1
PROCNO    1
Date_     20110302
Time      15.37
INSTRUM   spect
PROBHD    5 mm PABBO BB-
PULPROG   zg30
TD        65536
SOLVENT   CDCl3
NS         8
DS         2
SWH        6195.119 Hz
FIDRES    0.384533 Hz
AQ         5.2953587 s
RG         57
DW         90.800 us
DE         6.50 us
TE         298.6 K
D1         1.00000000 s
TD0        1
===== CHANNEL f1 =====
NUC1       1H
P1         11.80 us
PL1        0.00 dB
PL12       11.55467796 W
SFO1       300.13149374 MHz
SI         32768
SF         300.13000005 MHz
WDW        EM
SSB        0
LB         0.30 Hz
GB         0
PC         1.00
```

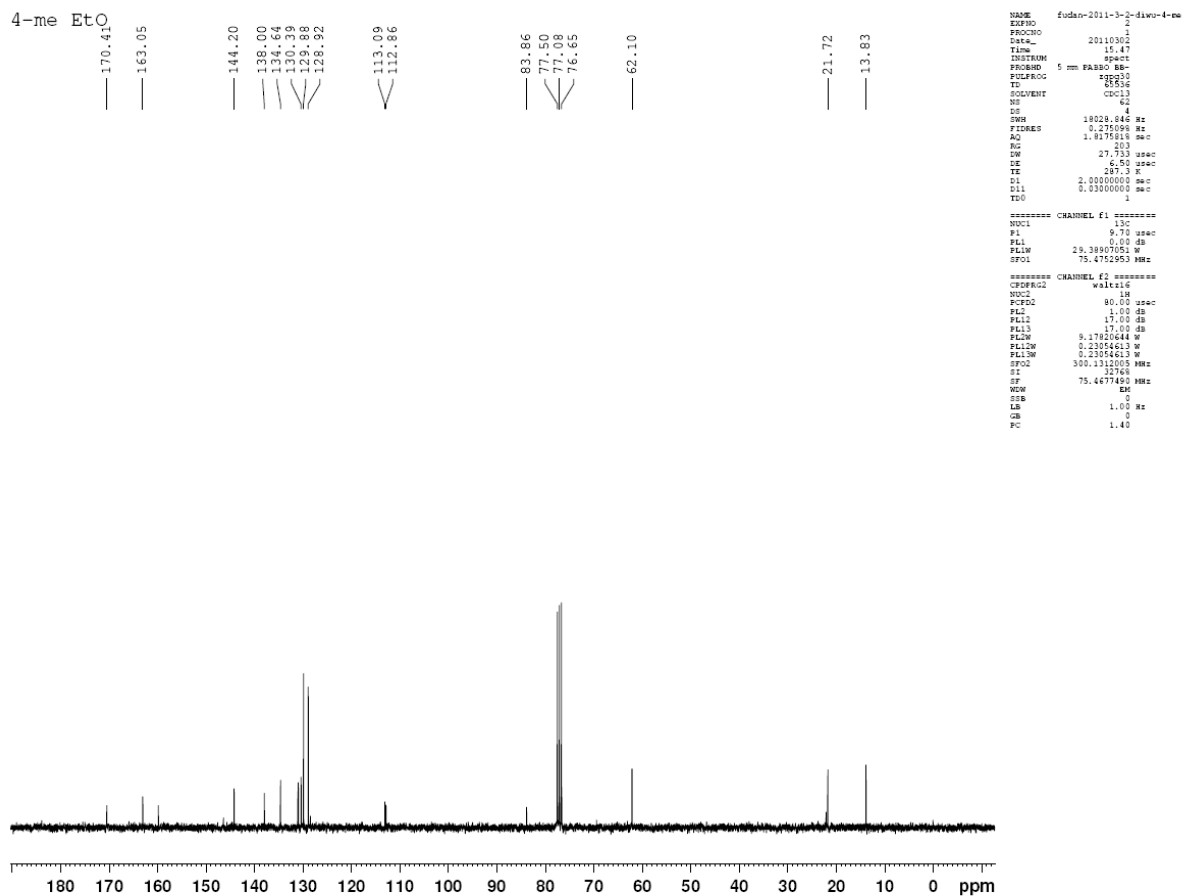





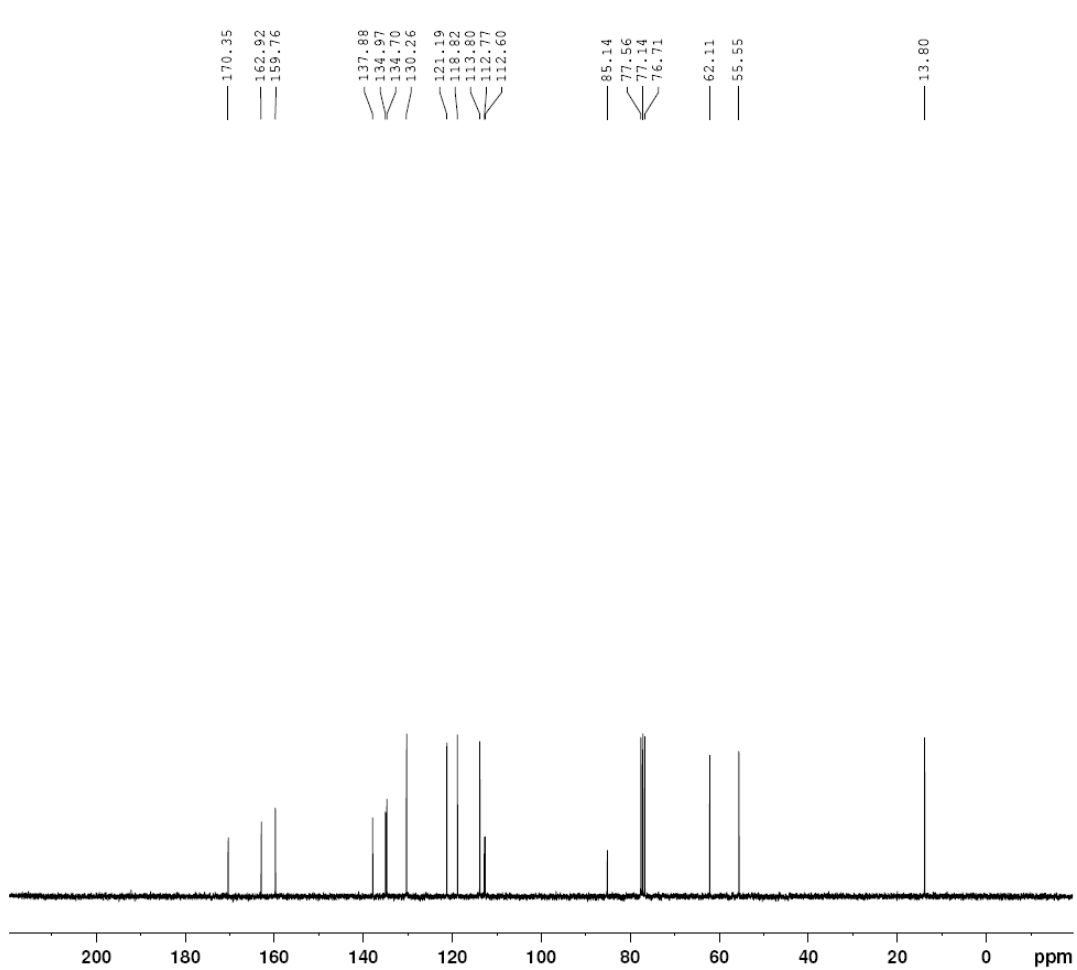

```

NAME f3dnc-2010-11-07-d1w1-
EXPNO 2
PROCNO 1
Date_ 20101207
TIME 12.02
INSTRUM spect
PROBHD 5 mm F4BBO BE-
PULPROG zgpg30
TD 65536
SOLVENT CDCl3
NS 80
DS 4
SWH 18028.846 Hz
FIDRES 0.275088 Hz
AQ 1.8175816 sec
RG 320
EM 27.733 usec
LE 6.50 usec
TE 290.2 K
D1 2.0000000 sec
d11 0.0300000 sec
TD0 1
----- CHANNEL f1 -----
NUC1 13C
P1 8.70 usec
PL1 0.00 dB
PALW 20.3807091 W
SFO1 75.478293 MHz
----- CHANNEL f2 -----
CPDPRG2 waltz16
NUC2 1H
PCPD2 80.00 usec
PL2 1.00 dB
PL12 17.00 dB
PL13 9.1782044 dB
PL14 0.2305463 W
PALW 0.1305463 W
SFO2 300.1312025 MHz
SI 32768
SF 75.4677480 MHz
WDW EM
SSB 0
LB 1.00 Hz
GB 0
PC 1.40
    
```

### Ethyl 4,4-dicyano-2-methylene-3-m-tolylbut-3-enoate: 3f

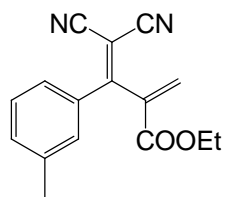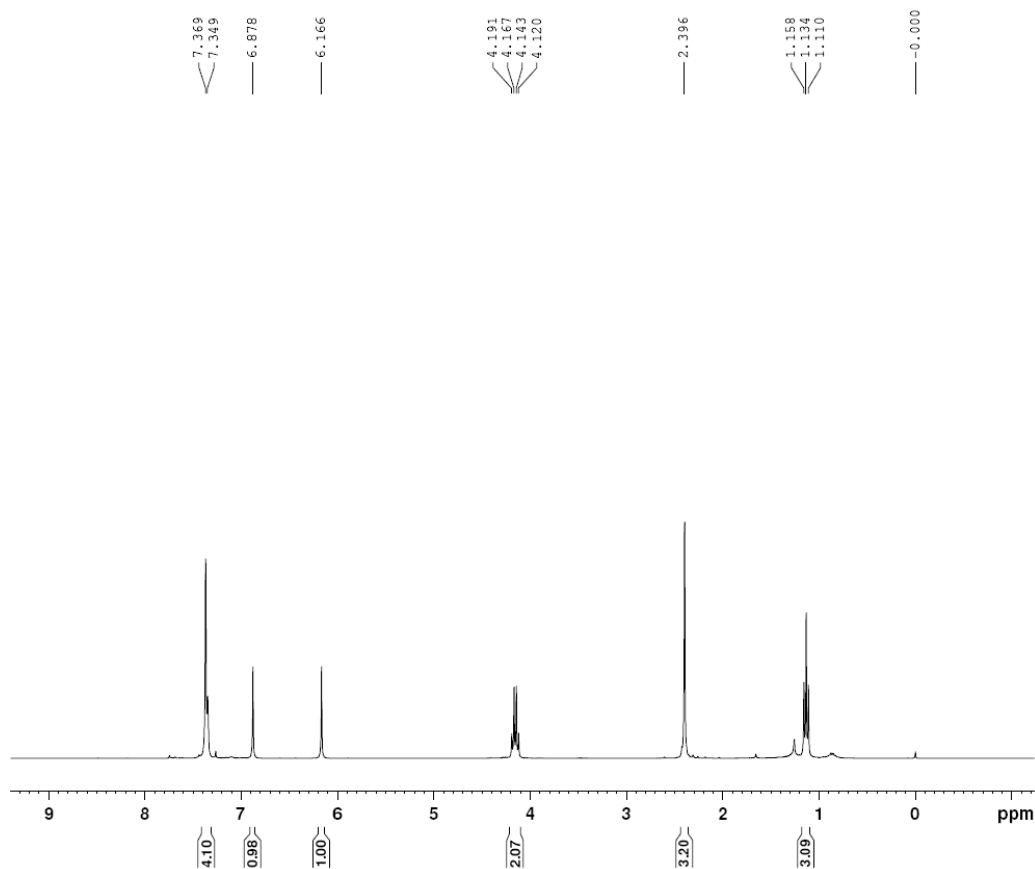

```
NAME      EUGEN-2010-12-01-01WU-3-FM
EXPNO    1
PROCNO   1
Date_    20101201
Time     14.33
INSTRUM  spect
PROBHD   5 mm BBOBO BB-
PULPROG  zgpg30
TD        65536
SOLVENT  CDCl3
NUC1      13
DE        8
AQ        0.00000000
RG        320
DE        80.00000000
TE        299.2 K
D1        1.00000000 sec
D2
D3
----- CHANNEL f1 -----
NUC1      1H
P1        11.00000000
PL1       0.00 dB
F1        11.00000000 MHz
SFO1      300.13000000 MHz
SF         300.13000000 MHz
WDW        EM
SSB        0
LB         0.30 Hz
GB         0
PC         1.00
```

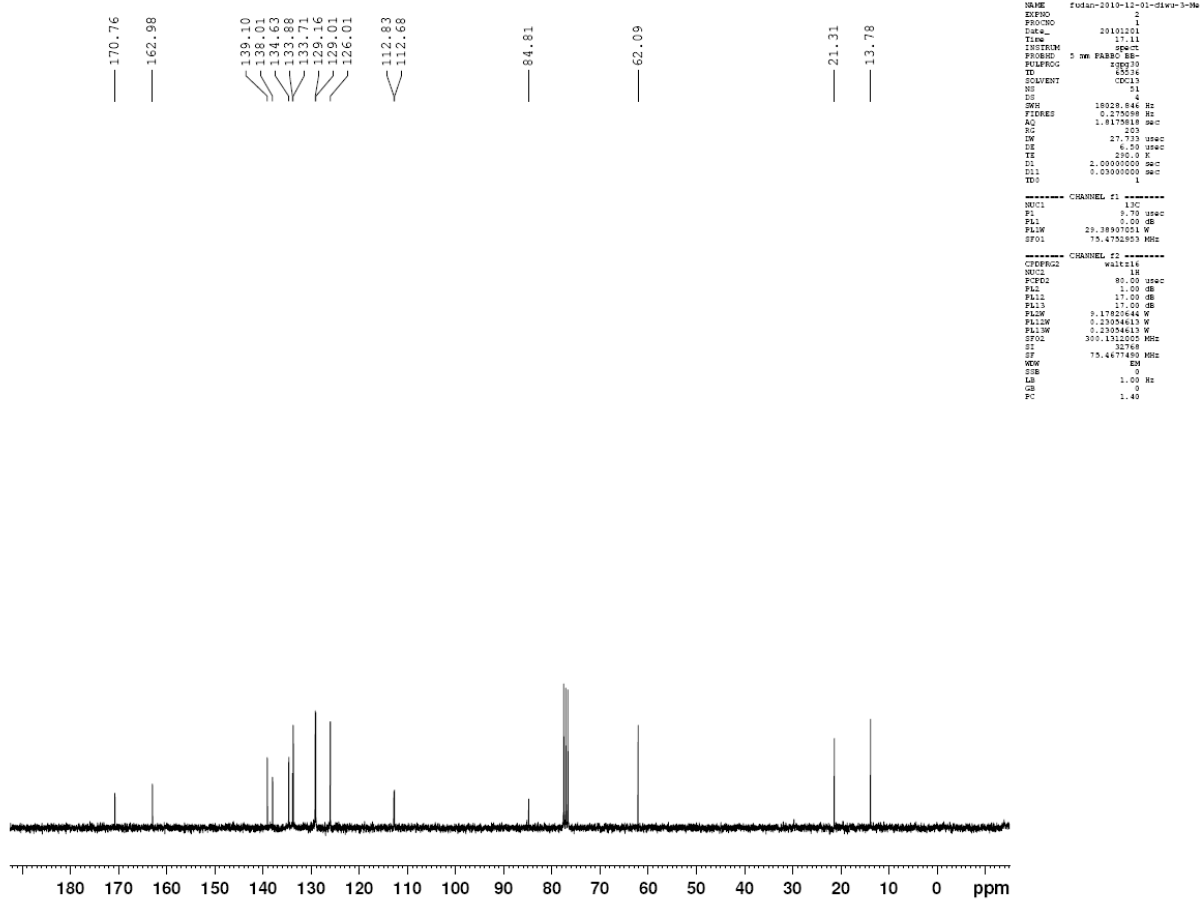

### Ethyl 4,4-dicyano-2-methylene-3-o-tolylbut-3-enoate: 3g

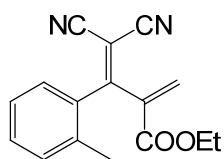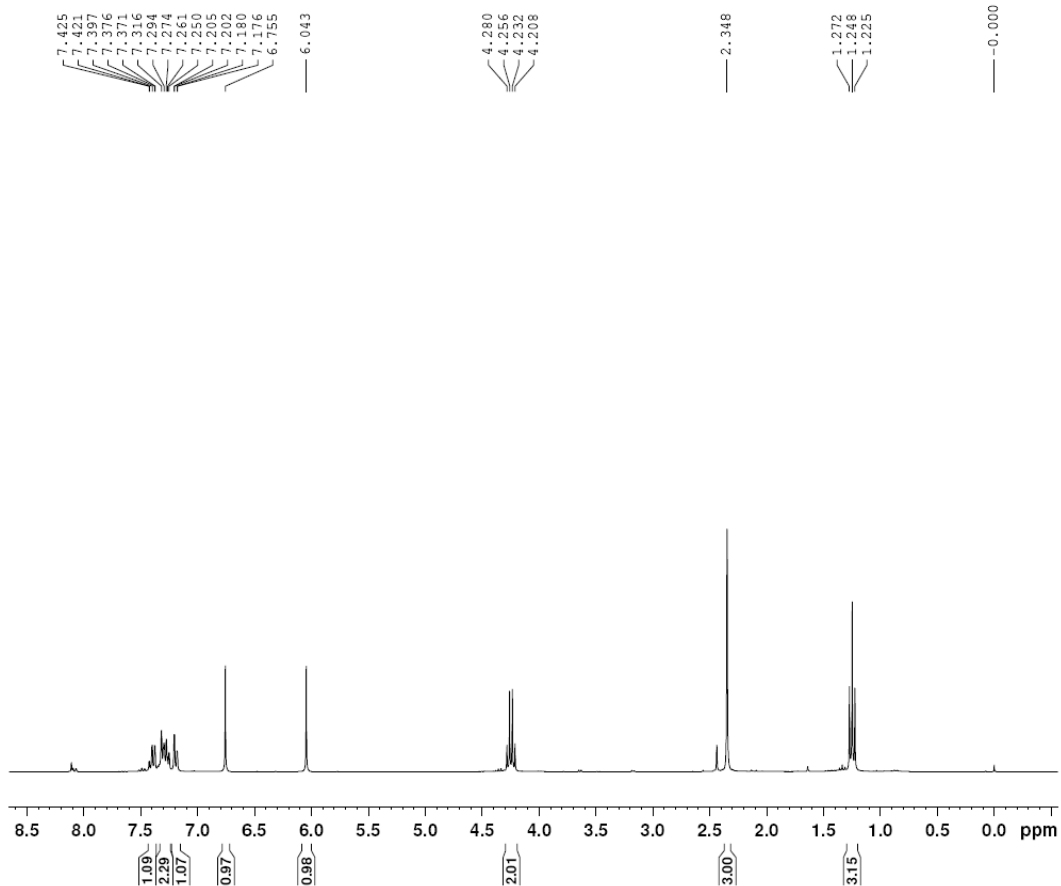

```
NAME: 13345-4914-12-13-01WU-06
EXPNO: 1
PROCNO: 1
Date_ : 20101213
Time: 17.11
INSTRUM: spect
PROBHD: 5 mm PABBO 90-
PULPROG: zg30
ID: 62534
SOLVENT: CDCl3
NS: 8
DS: 8
SWH: 6188.115 Hz
F2: 0.394623 Hz
AQ: 5.295397 sec
RG: 49.3
PC: 80.800 usec
DE: 6.50 usec
TE: 290.2 K
DC: 1.0000000 sec
TD: 0
----- CHANNEL f1 -----
NUC1: 13
P1: 11.00 usec
PL1: 0.00 dB
PL12: 11.55467768 W
SFO1: 300.1318534 MHz
SC: 32768
SF: 300.1310014 MHz
WDW: EM
SSB: 0
LB: 0.30 Hz
GB: 0
PC: 1.00
```

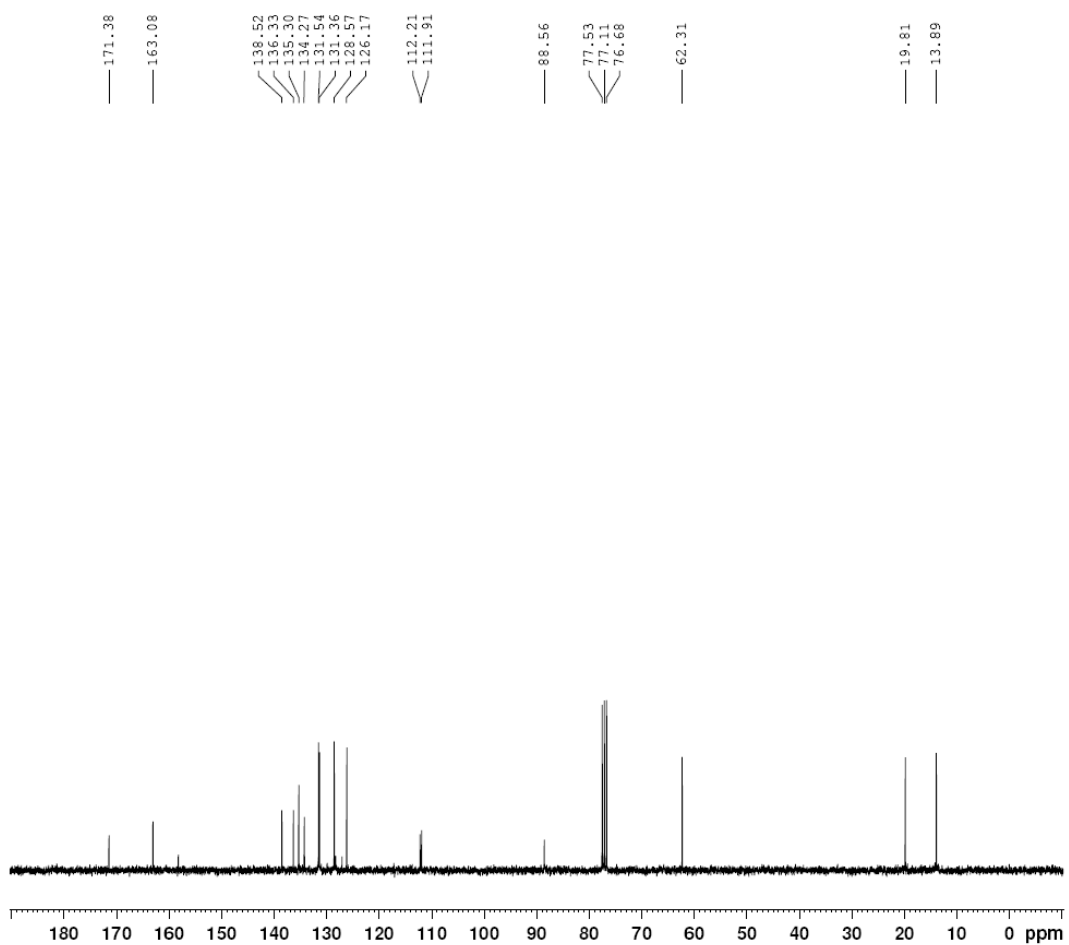

```
NAME      fudan-2010-12-13-dixu2-
EXPNO     1
PROCNO    1
DATE_     20101213
TIME      17.16
INSTRUM   spect
PROBHD    5 mm PABBO BB-
PULPROG   zgpg30
TD         65536
SOLVENT   CDCl3
NS         70
DS         4
SWH        18008.846 Hz
FIDRES     0.275098 Hz
AQ         1.8175818 sec
RG         403
AQ         27.733 usec
DE         6.50 usec
TE         280.6 K
D1         2.00000000 sec
d11        0.03000000 sec
TD0        1
----- CHANNEL f1 -----
NUC1       13C
P1         9.70 usec
PL1        0.00 dB
PL1W       23.36907051 W
SFO1       75.4752953 MHz
----- CHANNEL f2 -----
CPDPRG2   waltz16
NUC2       1H
PCPD2     80.00 usec
PL2        1.00 dB
PL2W      17.00 dB
PL3        17.00 dB
PL3W      17.00 dB
PL4W      9.17520644 W
PL5W      0.23054613 W
SFO2       300.1312005 MHz
SI         32768
SF         75.4677490 MHz
WDW        EM
SSB        0
LB         1.00 Hz
GB         0
PC         1.40
```

**Ethyl 3-(4-bromophenyl)-4,4-dicyano-2-methylenebut-3-enoate: 3h**

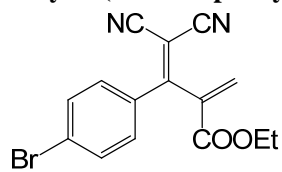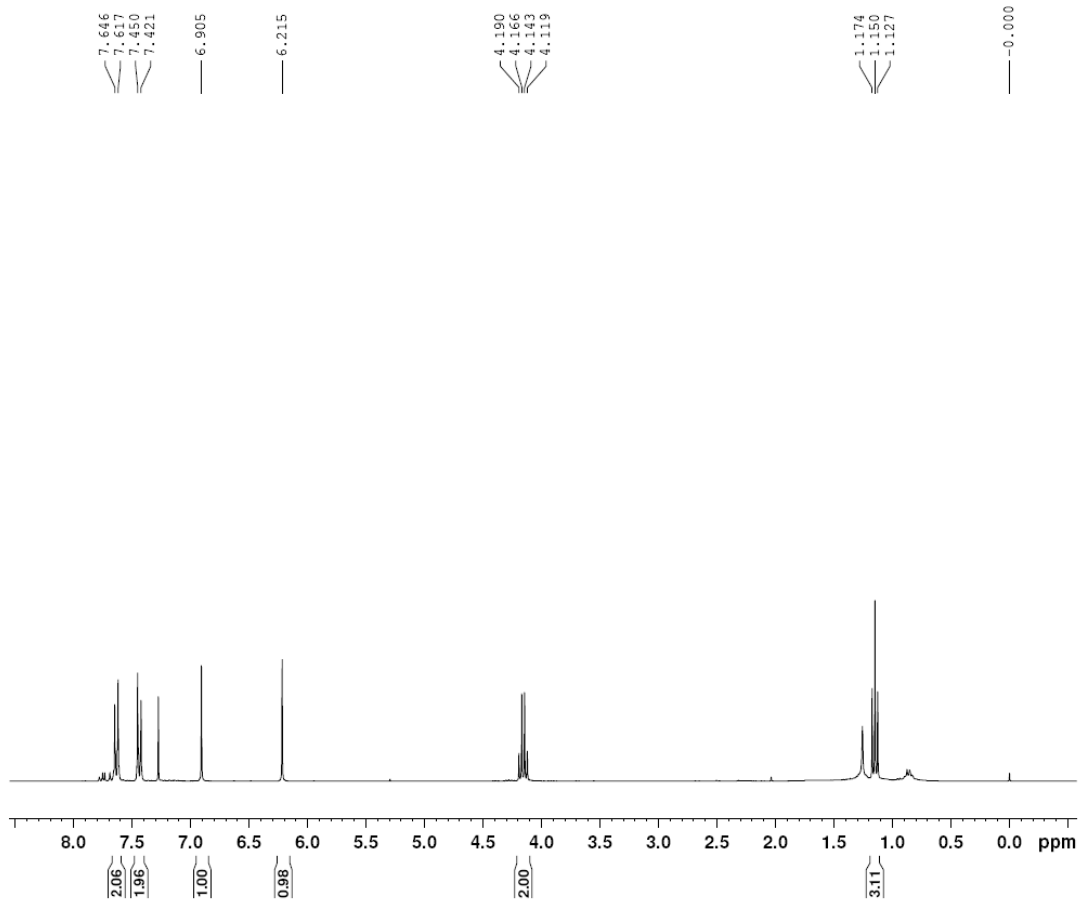

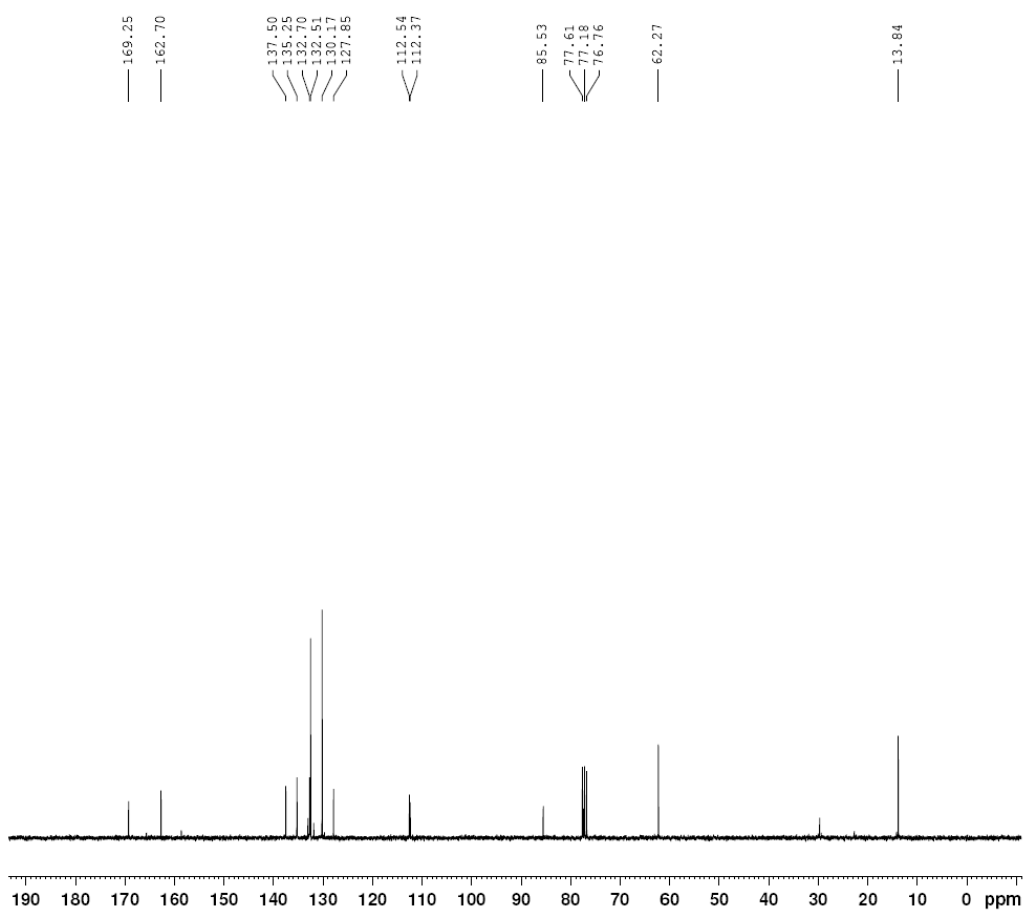

```
NAME      fusan-2010-12-24-d1w-4-Bz
EXPNO    1
PROCNO   1
Date_    20101224
Time     21:22
INSTRUM  spect
PROBHD   5 mm F4BBO BB-
PULPROG  zgpg30
TD        65536
SOLVENT  CDCl3
NS        48
DS        4
SWH       19928.846 Hz
FIDRES   0.270088 Hz
AQ        1.817018 sec
RG        303
RM        27.733 spec
DE        6.50 spec
TE        299.2 K
D1        2.0000000 sec
d11       0.0300000 sec
DEL       1
----- CHANNEL f1 -----
NUC1      13C
P1        3.30 spec
PL1       0.00 dB
PL12W    29.38937081 W
DF01      75.4751953 MHz
----- CHANNEL f2 -----
CPDPRG2  waltz16
NUC2      1H
PCPD2    60.00 spec
PL2       1.00 dB
PL12     17.00 dB
PL13     17.00 dB
PL12W    3.1787644 W
PL13W    3.2054613 W
PL13W    3.2054613 W
SFO2     300.1362000 MHz
SI        32768
SF        75.4677480 MHz
MW        0
SE        0
LB        1.00 Hz
GB        0
PC        1.40
```



### Ethyl 3-(4-chlorophenyl)-4,4-dicyano-2-methylenebut-3-enoate: 3i

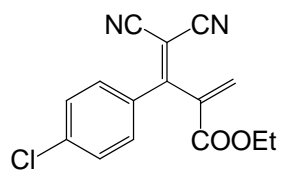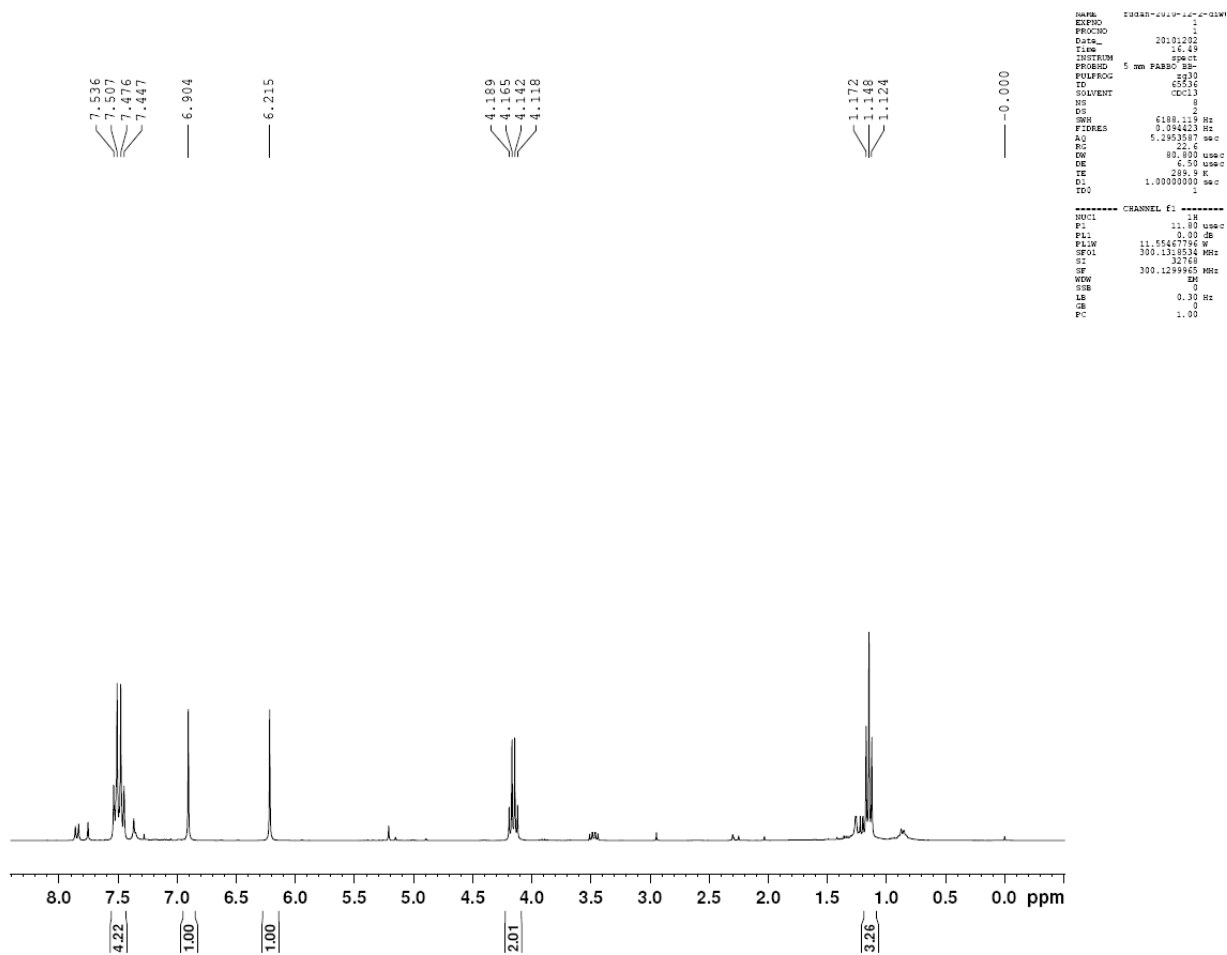

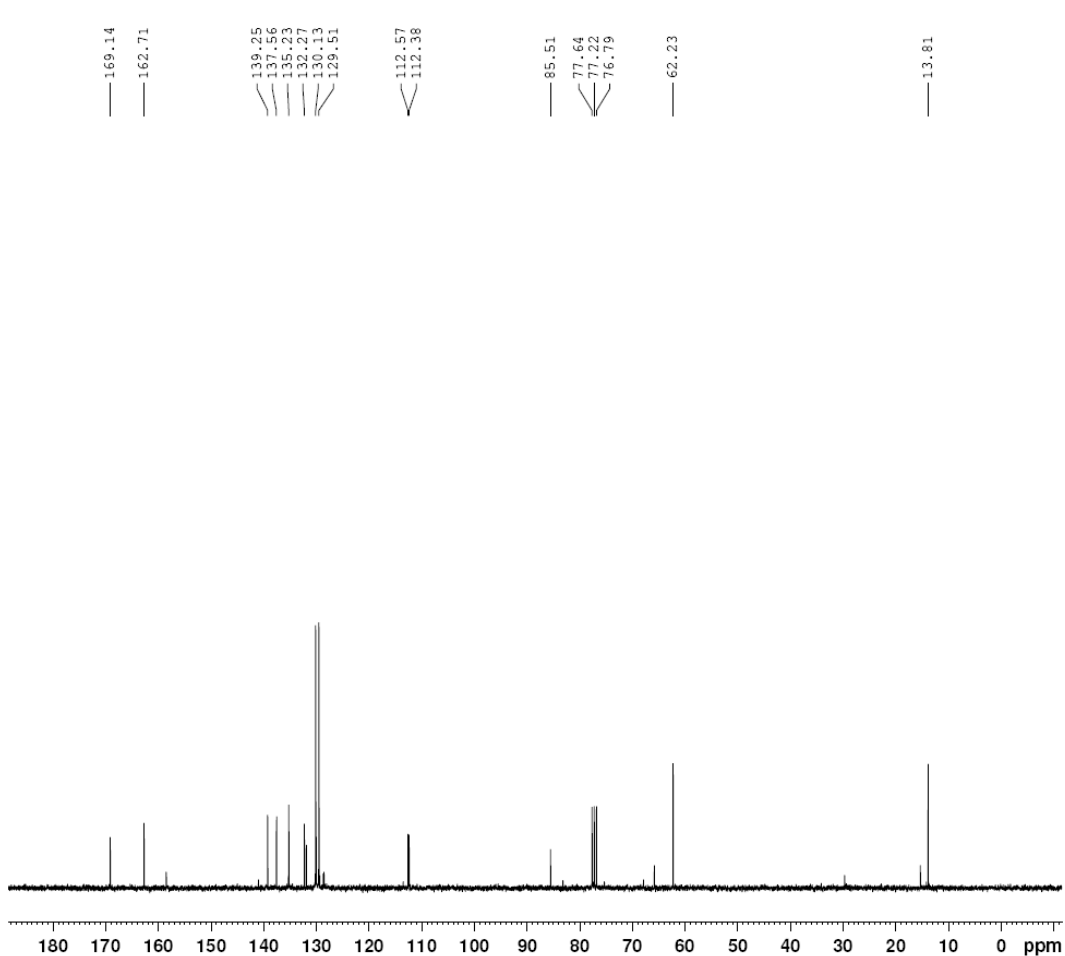

```

NAME      fudan-2010-12-2-diw
EXPNO    1
PROCNO   1
Date_    20101002
Time     21.48
INSTRUM  spect
PROBHD   5 mm PABBO BB-
PULPROG  zgpg30
TD        65536
SOLVENT  CDCl3
NS        36
DS        4
SWH       15028.846 Hz
FREQS     62.82058 Hz
AQ        1.8175918 sec
RG         203
DW        27.733 usec
TE        300.2 K
DE        6.50 usec
TE        300.2 K
DI        2.0000000 sec
D11       0.3300000 sec
TD0       1

----- CHANNEL f1 -----
NUC1      13C
P1        9.70 usec
PL1       0.00 dB
PL12      29.36907051 W
SFO1      75.4752953 MHz

----- CHANNEL f2 -----
CPCPRG2  waltz16
NUC2      1H
PCPD2     80.00 usec
PL12      1.00 dB
PL13      17.00 dB
PL14      17.00 dB
PL15      17.00 dB
PL16      17.00 dB
PL17      17.00 dB
PL18      17.00 dB
PL19      17.00 dB
PL20      17.00 dB
PL21      17.00 dB
PL22      17.00 dB
PL23      17.00 dB
PL24      17.00 dB
PL25      17.00 dB
PL26      17.00 dB
PL27      17.00 dB
PL28      17.00 dB
PL29      17.00 dB
PL30      17.00 dB
PL31      17.00 dB
PL32      17.00 dB
PL33      17.00 dB
PL34      17.00 dB
PL35      17.00 dB
PL36      17.00 dB
PL37      17.00 dB
PL38      17.00 dB
PL39      17.00 dB
PL40      17.00 dB
PL41      17.00 dB
PL42      17.00 dB
PL43      17.00 dB
PL44      17.00 dB
PL45      17.00 dB
PL46      17.00 dB
PL47      17.00 dB
PL48      17.00 dB
PL49      17.00 dB
PL50      17.00 dB
PL51      17.00 dB
PL52      17.00 dB
PL53      17.00 dB
PL54      17.00 dB
PL55      17.00 dB
PL56      17.00 dB
PL57      17.00 dB
PL58      17.00 dB
PL59      17.00 dB
PL60      17.00 dB
PL61      17.00 dB
PL62      17.00 dB
PL63      17.00 dB
PL64      17.00 dB
PL65      17.00 dB
PL66      17.00 dB
PL67      17.00 dB
PL68      17.00 dB
PL69      17.00 dB
PL70      17.00 dB
PL71      17.00 dB
PL72      17.00 dB
PL73      17.00 dB
PL74      17.00 dB
PL75      17.00 dB
PL76      17.00 dB
PL77      17.00 dB
PL78      17.00 dB
PL79      17.00 dB
PL80      17.00 dB
PL81      17.00 dB
PL82      17.00 dB
PL83      17.00 dB
PL84      17.00 dB
PL85      17.00 dB
PL86      17.00 dB
PL87      17.00 dB
PL88      17.00 dB
PL89      17.00 dB
PL90      17.00 dB
PL91      17.00 dB
PL92      17.00 dB
PL93      17.00 dB
PL94      17.00 dB
PL95      17.00 dB
PL96      17.00 dB
PL97      17.00 dB
PL98      17.00 dB
PL99      17.00 dB
PL100     17.00 dB

```

### Ethyl 4,4-dicyano-3-(4-fluorophenyl)-2-methylenebut-3-enoate: 3j

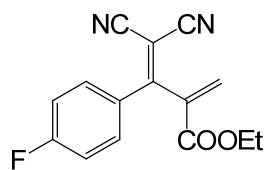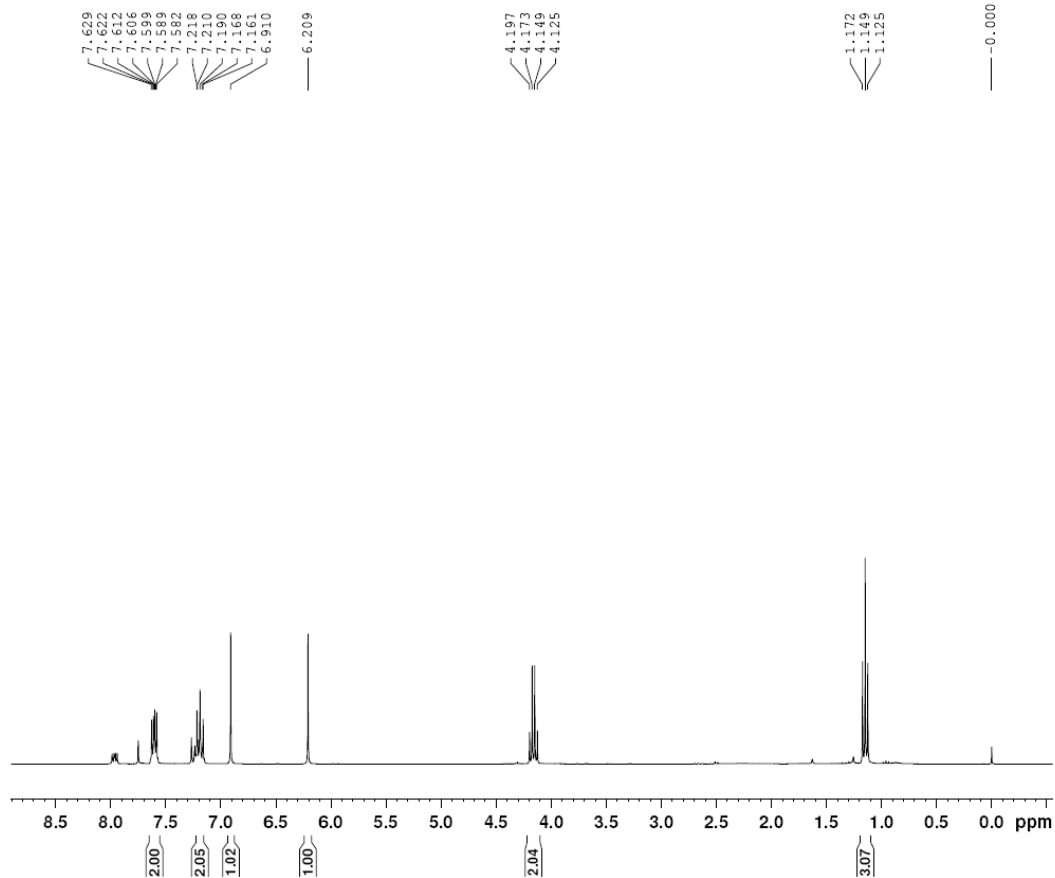

```
NAME      FUGAN-2010-12-J
EXPNO     1
PROCNO    1
Date_     20101203
Time      19.10
INSTRUM   spect
PROBHD    5 mm PABBO BB-
PULPROG   zgpg30
ID         65536
SOLVENT   CDCl3
NS         8
DS         2
SWH        6188.119
FIDRES     0.094423
AQ         5.2953587
RG         57
EW         80.800
DE         6.50
TE         299.6
D1         1.00000000
TD0        1

----- CHANNEL f1 -----
NUC1       1H
P1         11.80
PL1        0.00
PL1W       11.55467796
SFO1       300.1218534
SI         32768
SF         300.1299998
WDW        EM
SSB        0
LB         0.30
GB         0
PC         1.00
```

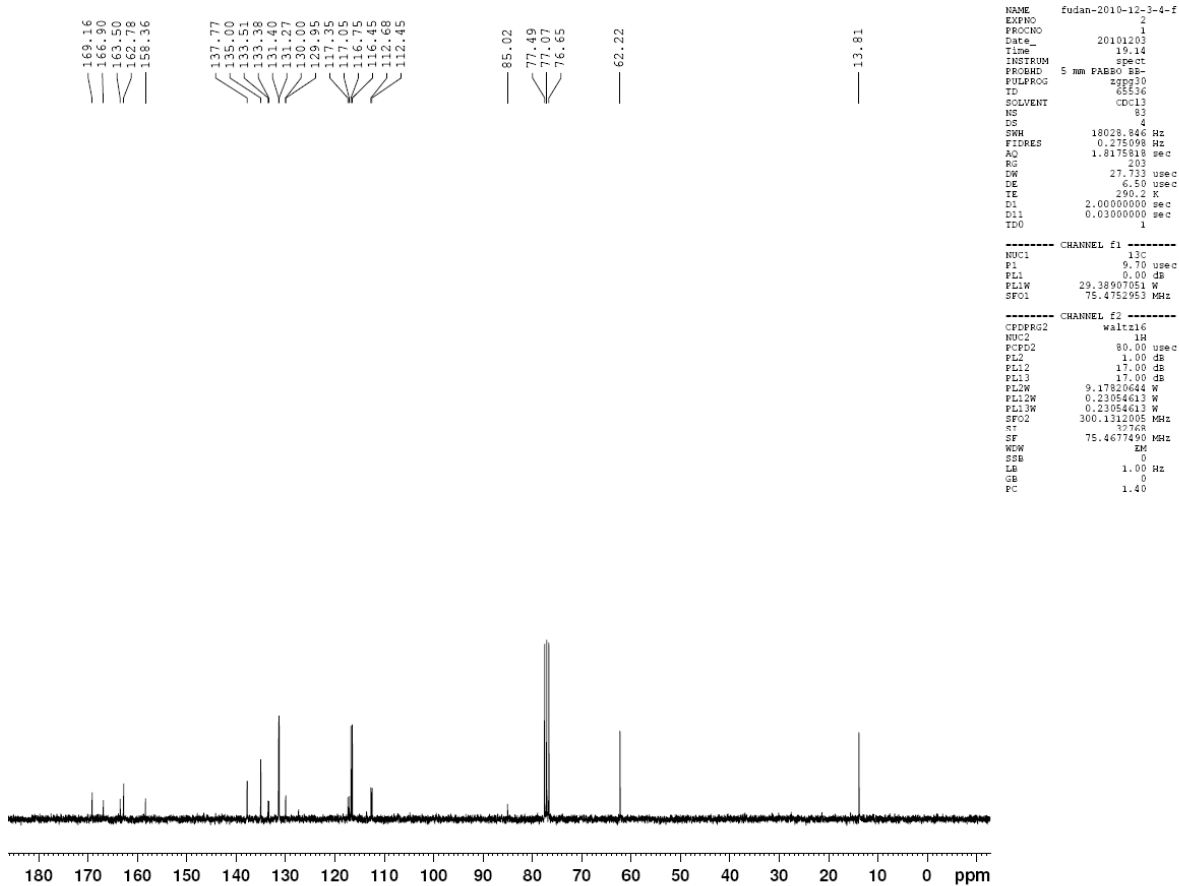

**Ethyl 4,4-dicyano-2-methylene-3-(4-(trifluoromethyl)phenyl)but-3-enoate: 3k**

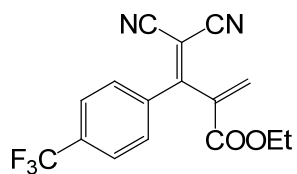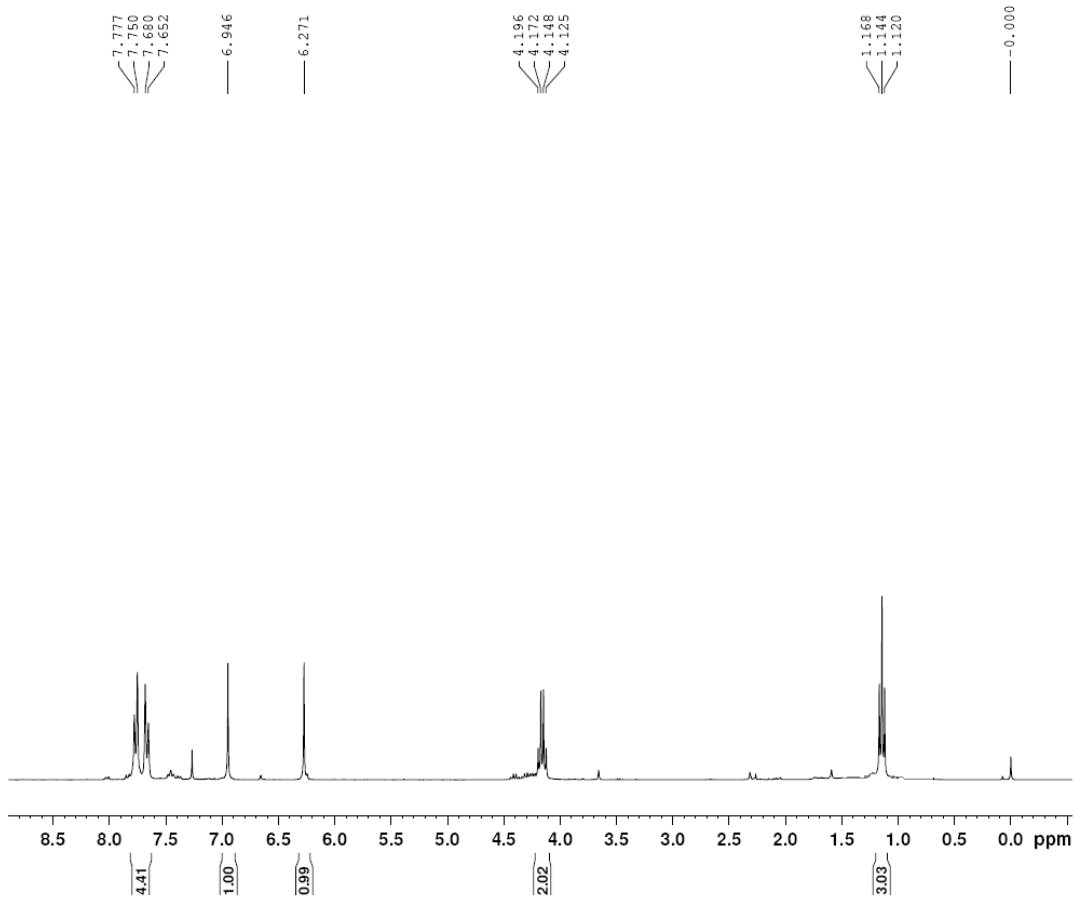

```
NAME: 12248-210-22
EXPNO: 1
PROCNO: 1
Date_ : 2010120
Time: 20.0
INSTRUM: spect
PROBHD: 5 mm PABBO BB
PULPROG: zgpg
TD: 6553
SOLVENT: CDCl3
NS: 1
DS: 4
SWH: 6189.11
F2: 0.09442
AQ: 5.295358
RG: 1.0
DE: 80.80
TE: 6.5
CE: 28.
CF: 1.0000000
TD0: 1
----- CHANNEL f1 -----
NUC1: 1
P1: 11.8
PL1: 0.0
PL1W: 11.5546775
SFO1: 300.131853
SI: 3276
SF: 300.130000
WDS: 21
SSB: 0
GB: 0.3
PC: 1.0
```

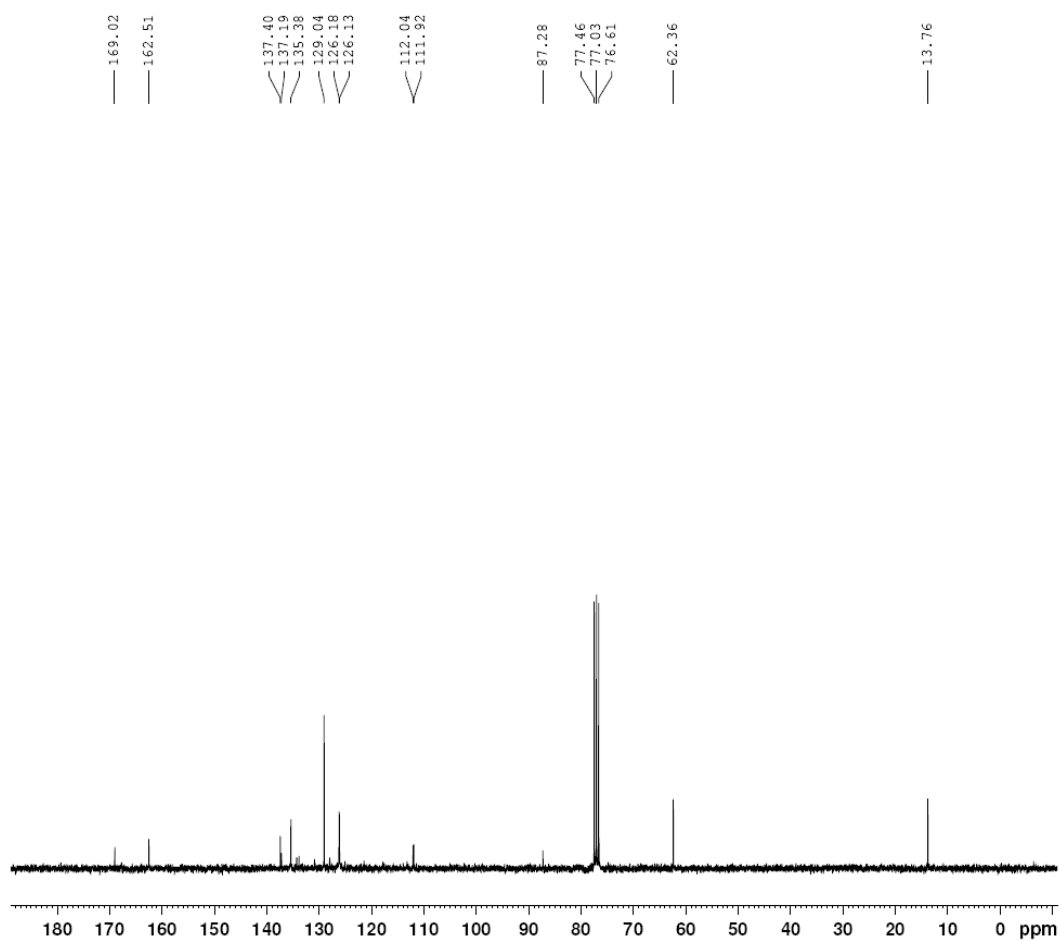

```
NAME fudan-2010-11-08-diwa
EXPNO 1
PROCNO 1
DATE_ 20101208
Time 20.17
INSTRUM spect
PROBHD 5 mm PABBO BB-
PULPROG zgpg30
TD 65536
SOLVENT cdcl3
NS 410
DS 4
SWH 18028.846 Hz
FIDRES 0.275098 Hz
AQ 1.8175516 sec
RG 303
SQ 27.533 usec
DE 6.50 usec
TE 298.4 K
D1 2.0000000 sec
D11 0.0300000 sec
TD0 1
----- CHANNEL f1 -----
NUC1 13C
P1 9.70 usec
PL1 0.00 dB
PLW 29.36807511 W
SFO1 75.47619513 MHz
----- CHANNEL f2 -----
CPCPRG2 waltz16
NUC2 1H
PCPD2 80.00 usec
PL2 1.00 dB
PL12 17.00 dB
PL13 17.00 dB
PLW 9.17810484 W
PLW2 0.23054613 W
PLW3 0.23054613 W
SFO2 300.13112005 MHz
SI 32768
SF 75.4677480 MHz
HM EM
SBS 0
LB 1.00 Hz
GB 0
PC 1.40
```



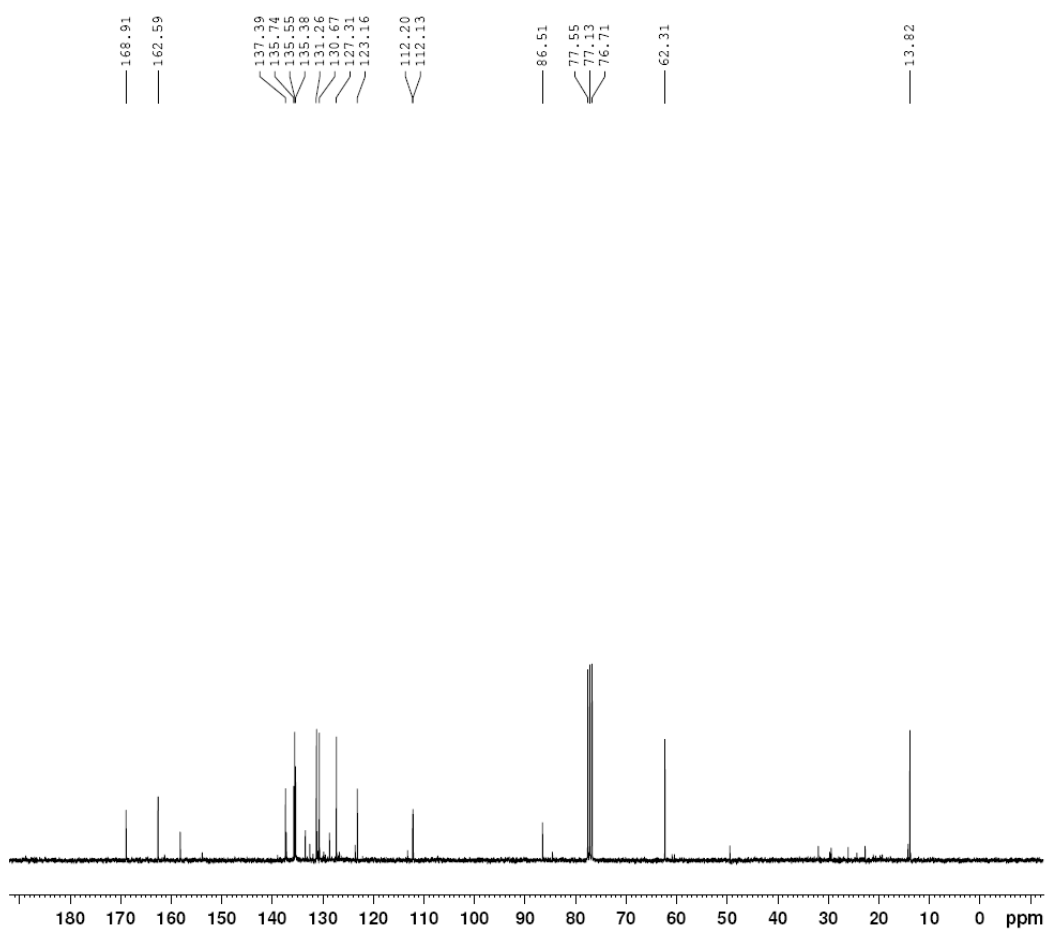

```
NAME fuda-2011-3-4-dw-3-3-r-y
EXPNO 1
PROCNO 1
F2 20110304
INSTRUM spect
PROBHD 5 mm JASBO-EB-
PULPROG zgpg30
TD 65536
SOLVENT CDCl3
NS 170
DS 4
SWH 18023.846 Hz
FIDRES 0.275990 Hz
AQ 1.8175818 sec
RG 203
DM 27.733 usec
DE 6.50 usec
TE 280.1 K
D1 2.0000000 sec
D11 0.0300000 sec
TD0 1
----- CHANNEL f1 -----
NUC1 13C
P1 9.70 usec
PL1 0.00 dB
PL12 20.3897861 W
RF01 75.4752653 MHz
----- CHANNEL f2 -----
CPDPRG2 waltz16
NUC2 1H
PCPD2 80.00 usec
PL2 1.00 dB
PL12 17.00 dB
PL13 17.00 dB
PDM 0.17820644 W
PDM2 0.23884613 W
PDM3 0.23884613 W
RF02 300.1312695 MHz
SI 32768
SF 75.4677490 MHz
SOLVENT CDCl3
NS 0
DS 0
SW 1.00 Hz
GB 0
DC 1.40
```



### Ethyl 3-(3-chlorophenyl)-4,4-dicyano-2-methylenebut-3-enoate: 3m

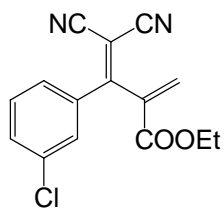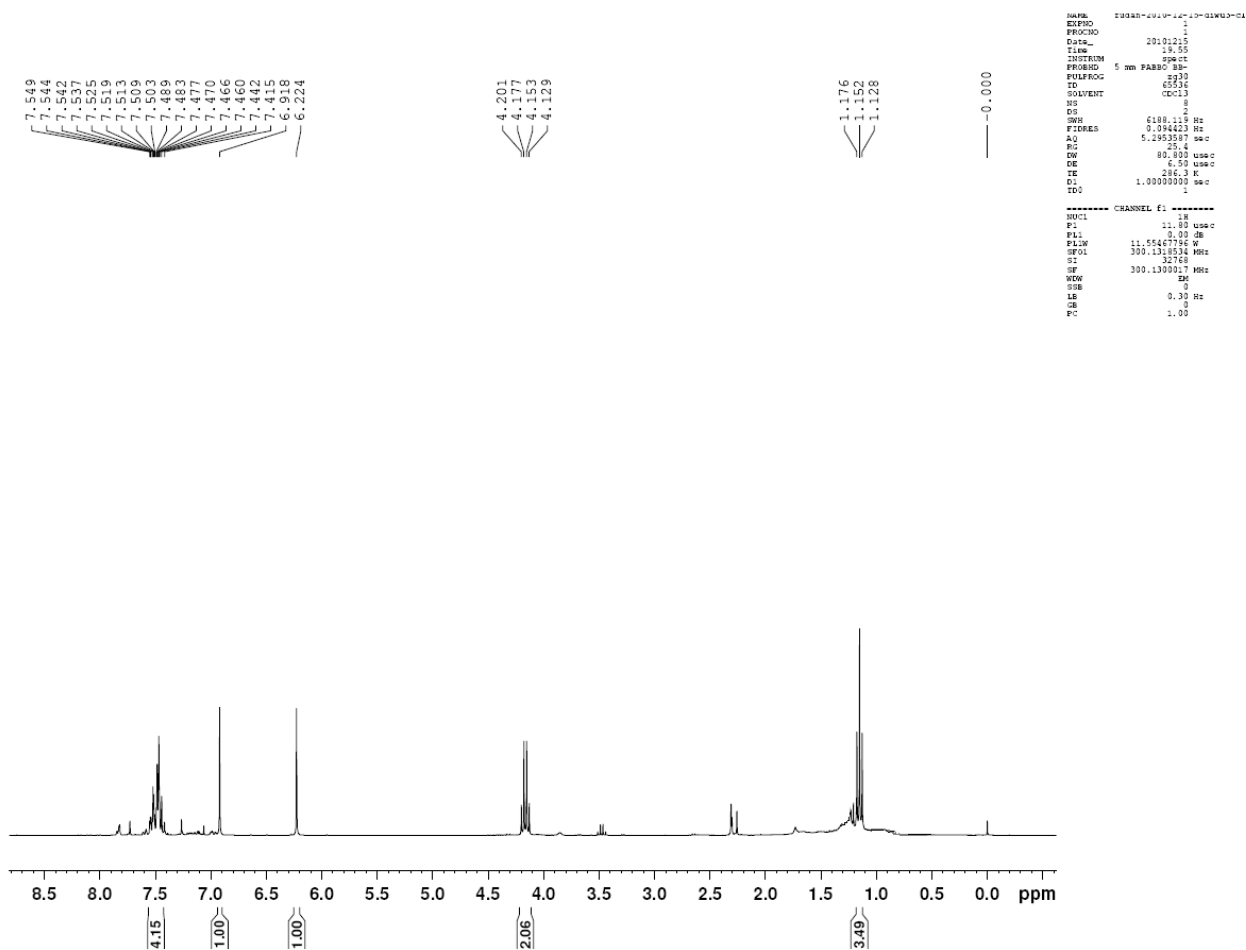

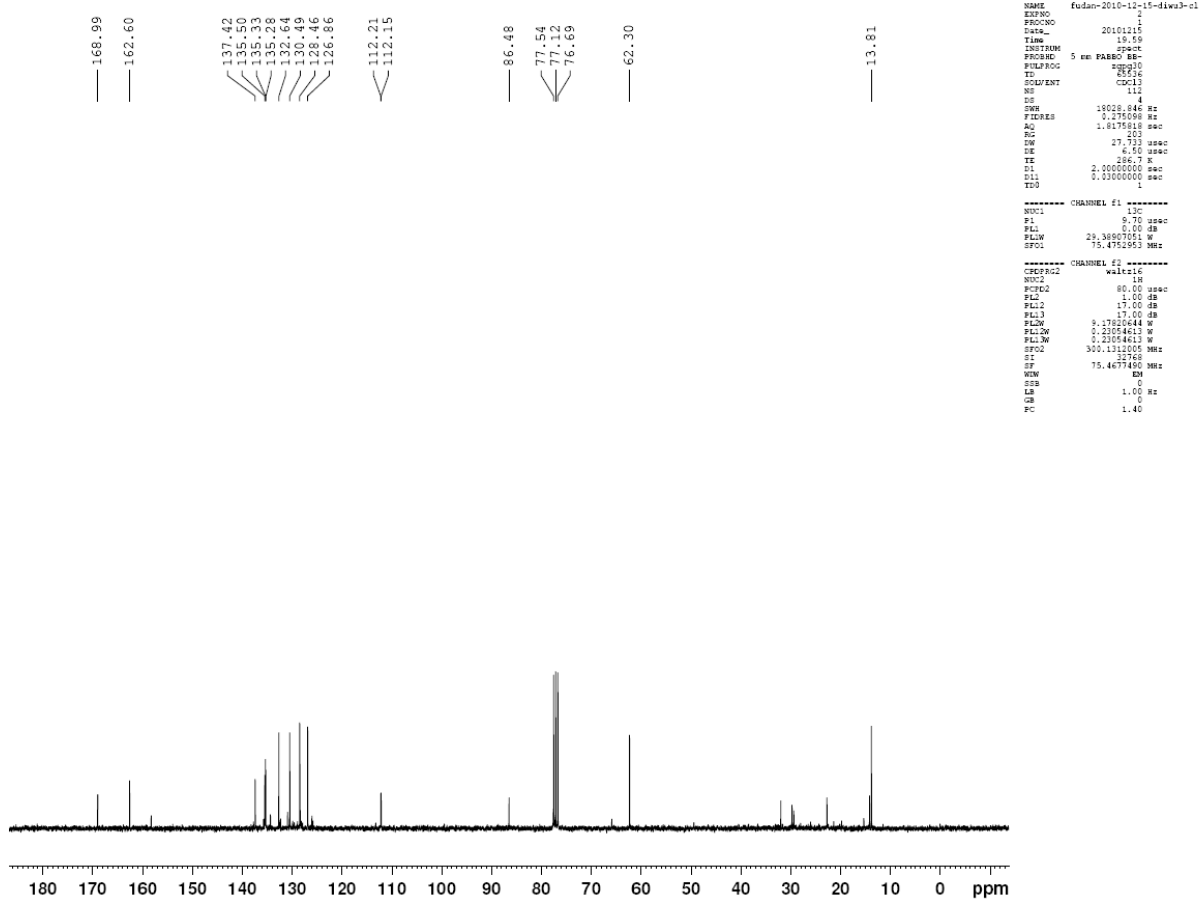

### Ethyl 4,4-dicyano-3-(2-fluorophenyl)-2-methylenebut-3-enoate: 3n

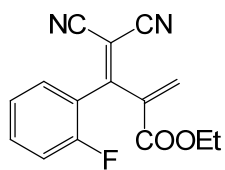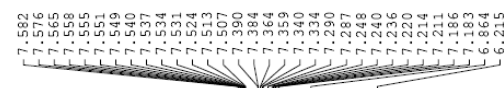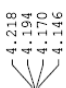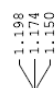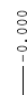

```
NAME          IUGAN-2010
EXPNO
PROCNO
Date_         2010
Time_         1
INSTRUM       5
PROBHD        5 mm PABBO
PULPROG
TD            6
SOLVENT
NS
DS
SWH           6188
FIDRES       0.09
AQ           5.295
RG
DW           80
DE
TE           2
D1           1.0000
TD0
----- CHANNEL f1
NUC1
F1           1
FLL
FLW         11.5546
SFO1        300.131
SI           3
SF          300.130
WDW
SSB
LB
GB
FC
```

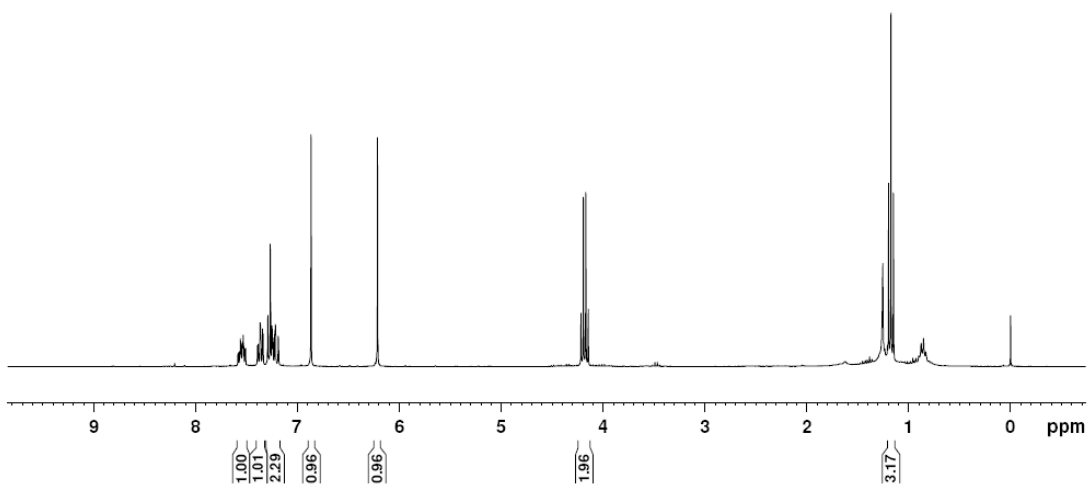

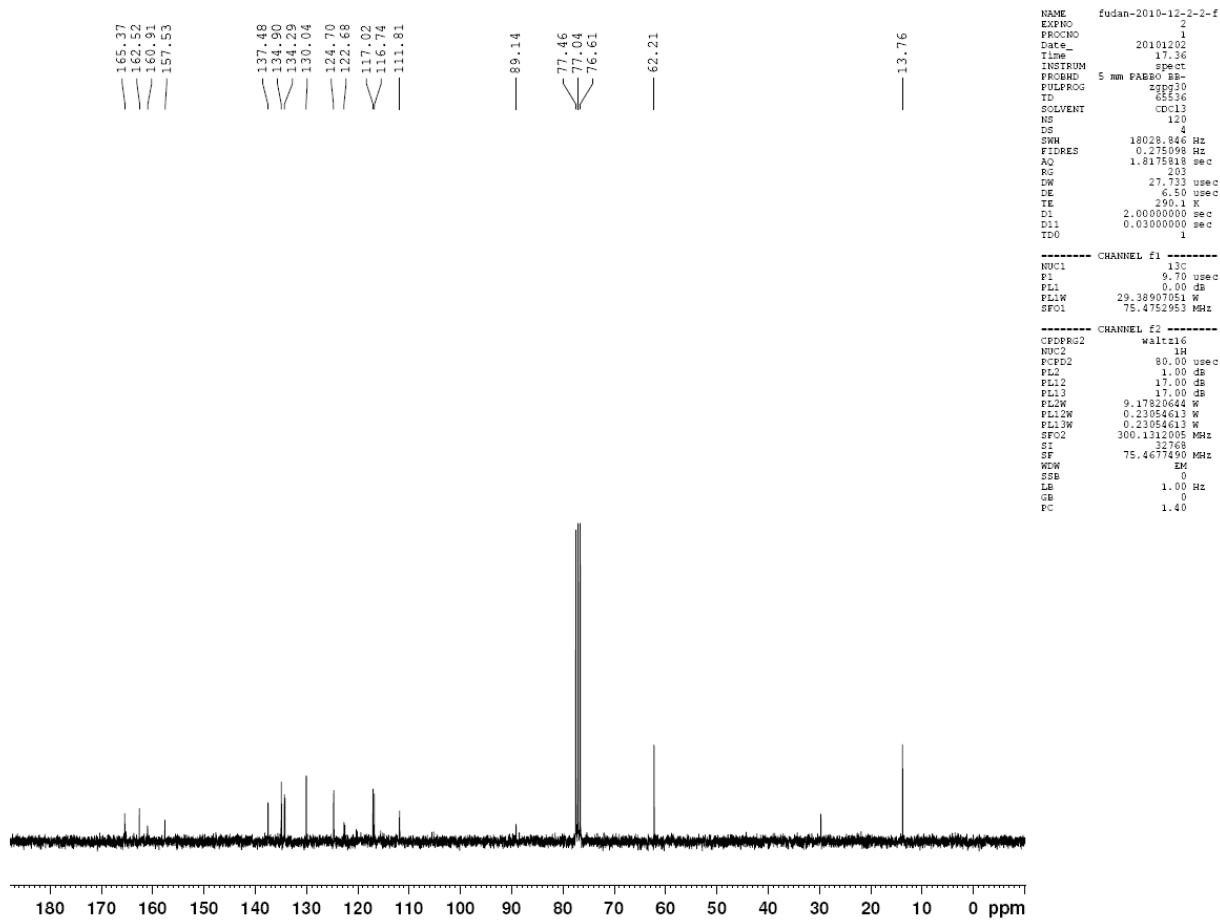

### Ethyl 4,4-dicyano-3-(furan-2-yl)-2-methylenebut-3-enoate: 3o

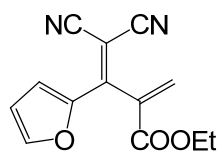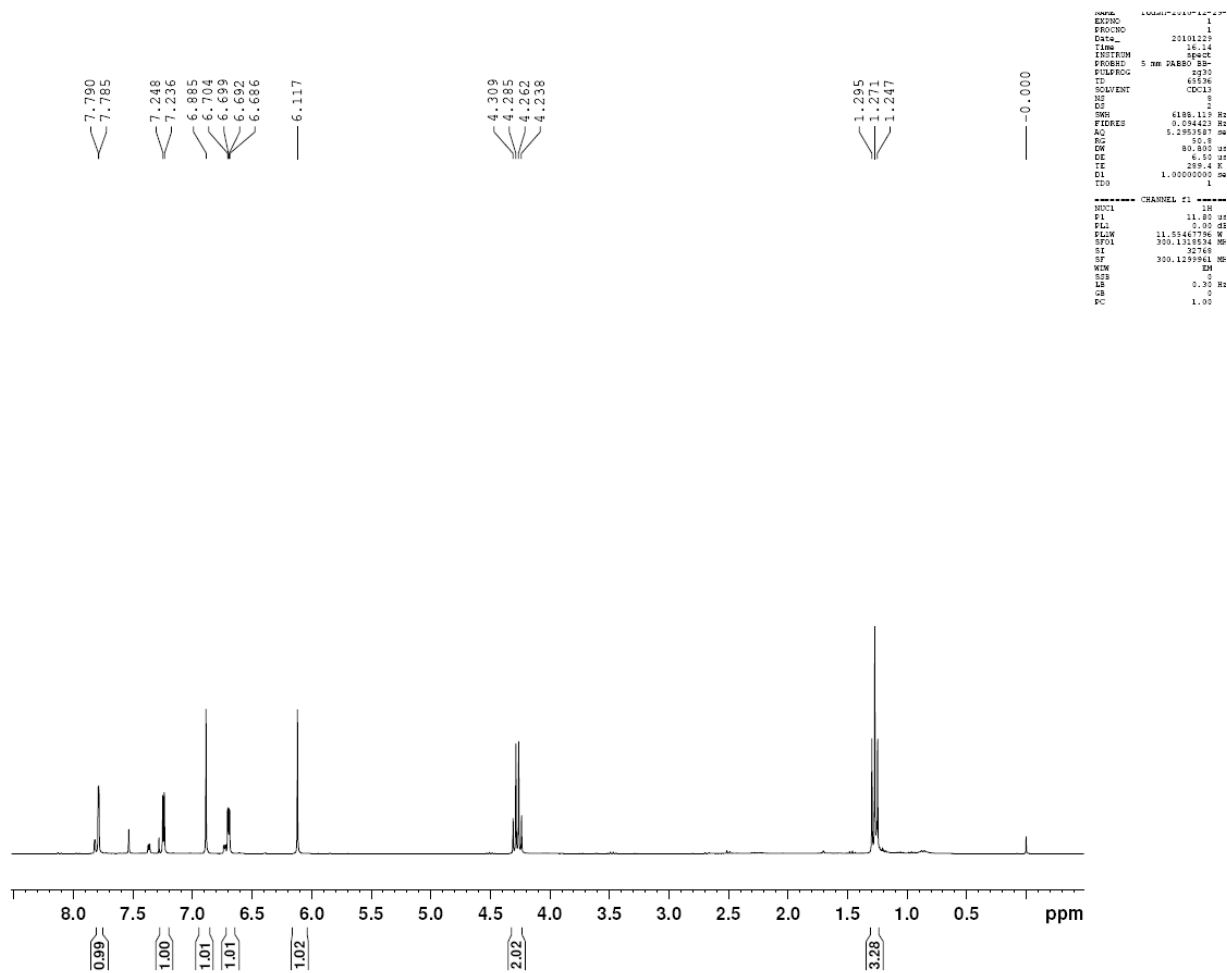

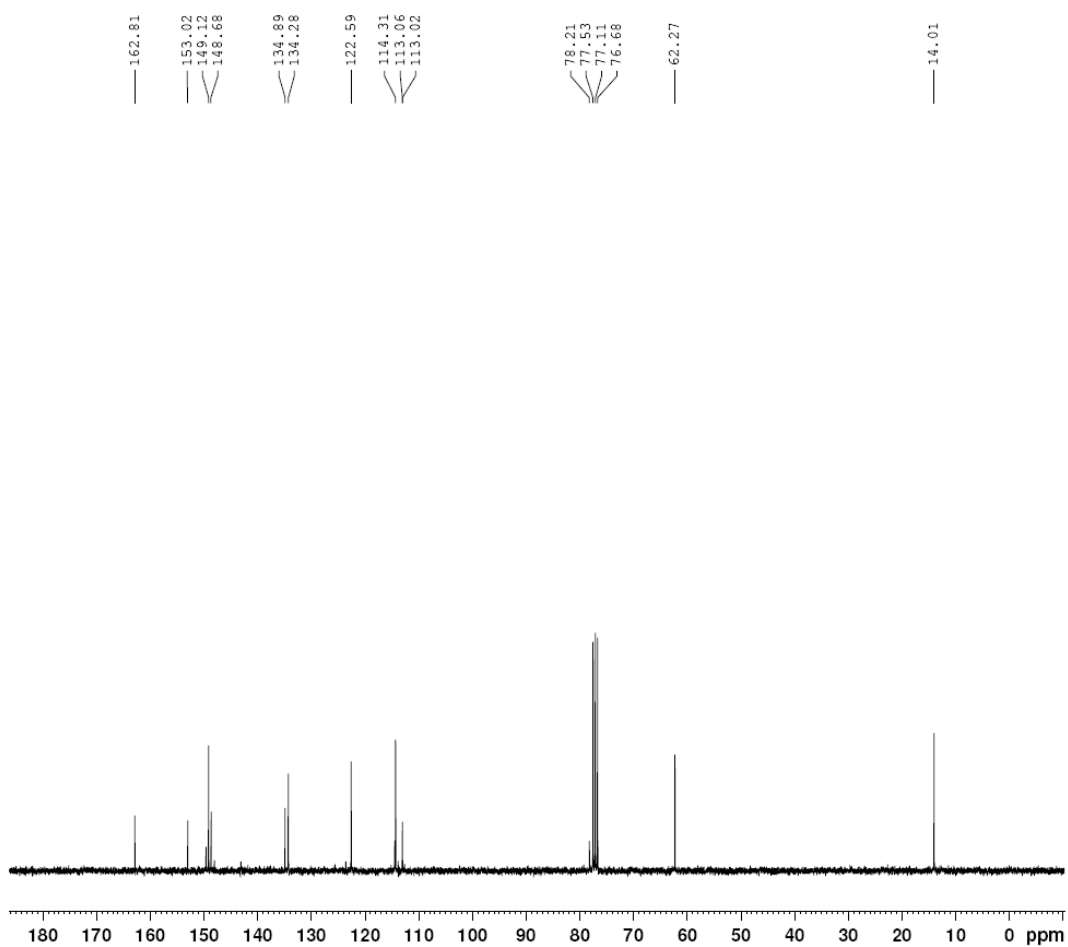

```
NAME fudan-2010-12-28-dtw-
EXPNO 2
PROCNO 1
F2 20010229
INSTR 1423
PROBHD 5 mm F400
PULPROG zgpg30
TD 65536
SOLVENT CDCl3
NS 137
DS 4
SWH 18028.848 Hz
FIDRES 0.275938 Hz
AQ 1.8175818 sec
RG 323
IN 27.733 usec
DE 6.99 usec
TE 299.2 K
D1 2.00000000 sec
d11 0.03000000 sec
TD0 1
----- CHANNEL f1 -----
NUC1 13C
P1 8.70 usec
PL1 0.00 dB
P1LM 29.38907391 W
SFO1 75.4752953 MHz
----- CHANNEL f2 -----
CE0PRG2 waltz16
NUC2 1H
P2PRG2 80.00 usec
PL2 1.00 dB
PL12 17.00 dB
PL13 17.00 dB
P1LM 9.17620644 W
P1LMW 0.22554813 W
P1LMW 0.23054613 W
SFO2 300.1312052 MHz
SI 32768
SF 75.4677450 MHz
GB 0
GBW 1.00 Hz
GB 0
PC 1.40
```

### Ethyl 4,4-dicyano-2-methylene-3-(thiophen-2-yl)but-3-enoate: 3p

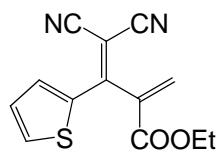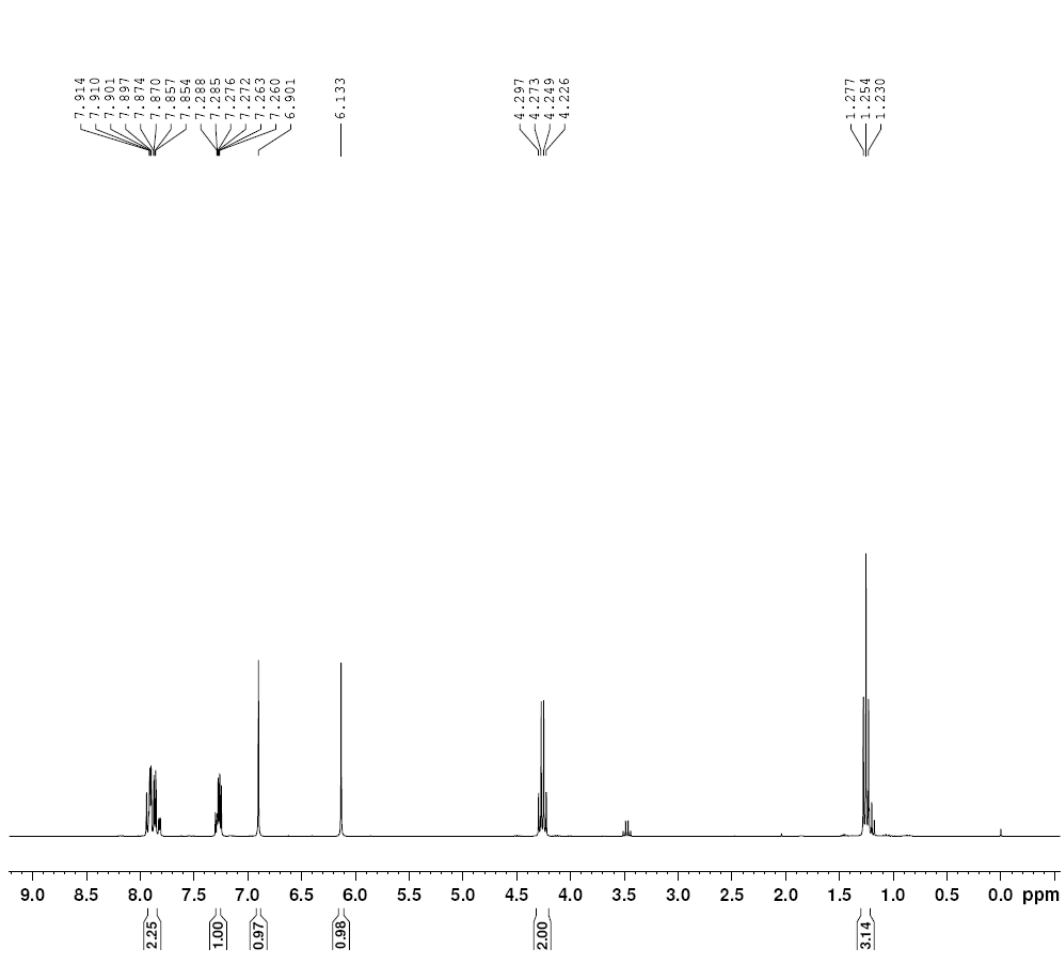





### Methyl 4,4-dicyano-3-(4-methoxyphenyl)-2-methylenebut-3-enoate: 3q

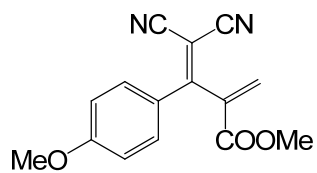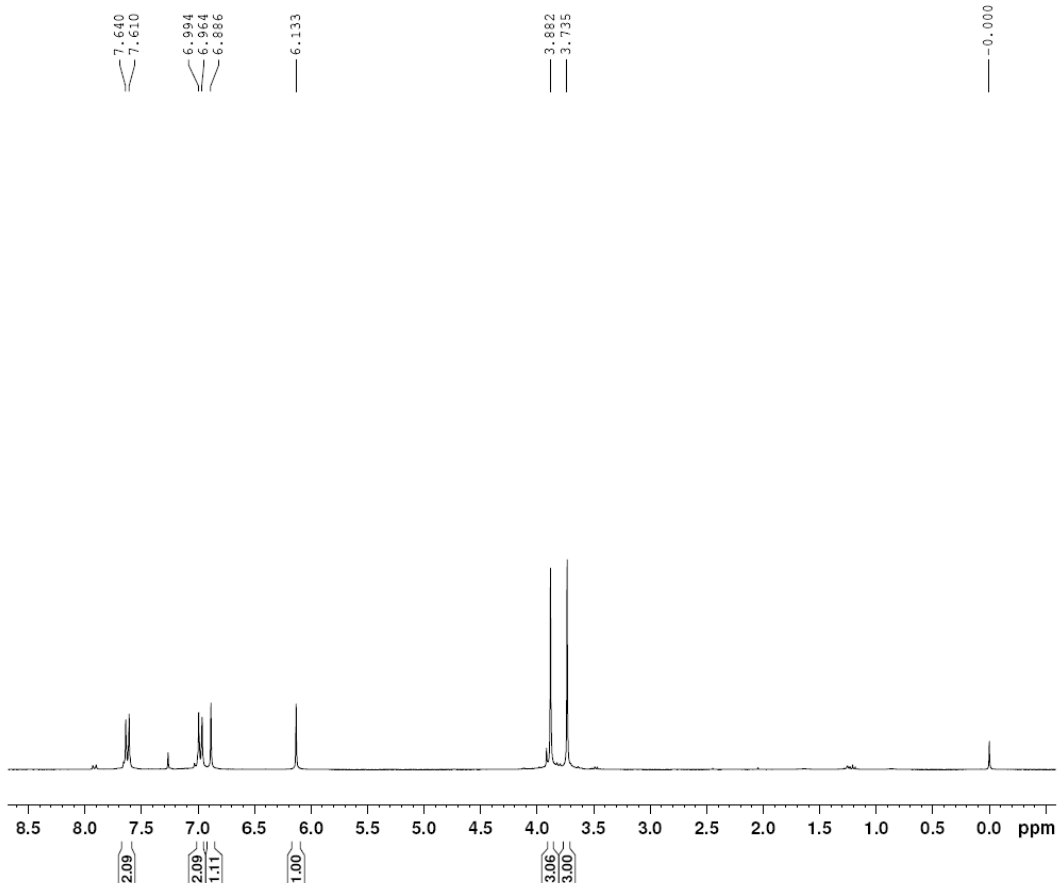

```
NAME      FUGAR-2010-10-1
EXPNO     1
PROCNO    1
Date_     20101016
Time      15.47
INSTRUM   spect
PROBHD    5 mm PABBO BB-
PULPROG   zg30
TD        65536
SOLVENT   CDCl3
NS        8
DS        2
SWH        6188.119
FIDRES    0.094423
AQ        5.2953587
RG        144
DW        80.800
DE        6.50
TE        290.5
D1        1.0000000
TD0       1

----- CHANNEL f1 -----
NUC1      1H
P1        11.80
PL1       0.00
PL1W      11.55467796
SFO1      300.1358534
SI        32768
SF        300.1300007
WDW       EM
SFE       0
LB        0.30
GB        0
PC        1.00
```

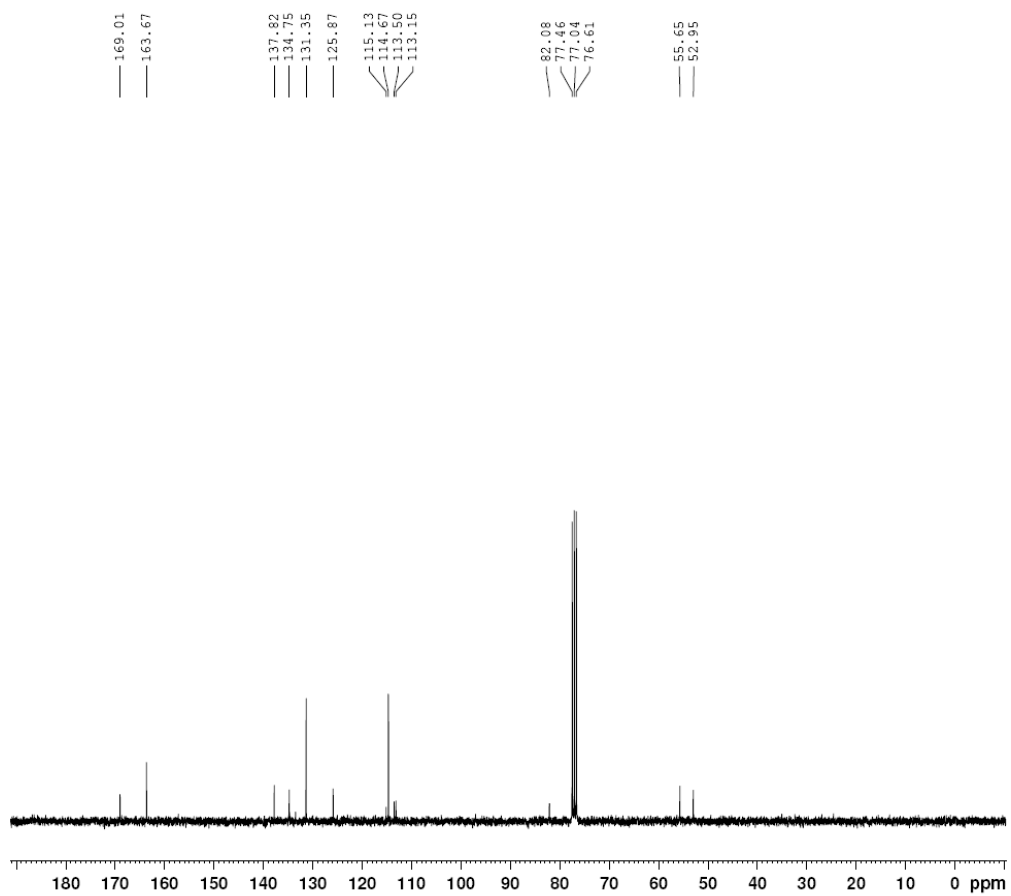

```
NAME      fudan-2010-10-16
EXPNO     2
PROCNO    1
Date_     20101016
Time      15.52
INSTRUM   spect
PROBHD    5 mm PABBO BB-
PULPROG   zgpg30
TD         65536
SOLVENT   CDCl3
NS         151
DS         4
SWH        18028.846 Hz
FIDRES     0.275896 Hz
AQ         1.8175818 sec
RG         203
DW         27.733 usec
DE         6.50 usec
TE         290.9 K
DL         2.00000000 sec
D11        0.03000000 sec
TD0        1

----- CHANNEL f1 -----
NUC1       13C
P1         9.70 usec
PL1        0.00 dB
PL1W       29.38907051 W
SFO1       75.4752953 MHz

----- CHANNEL f2 -----
CFDRPG2    waltz16
NUC2       1H
PCPD2      80.00 usec
PL2         1.00 dB
PL12        17.00 dB
PL13        17.00 dB
PL2W        9.17820644 W
PL12W       0.23054613 W
PL13W       0.23054613 W
SFO2       300.1312005 MHz
F2         32.763
SF         75.4677490 MHz
NUC3       1H
SFB         0
LB         1.00 Hz
GB         0
PC         1.40
```



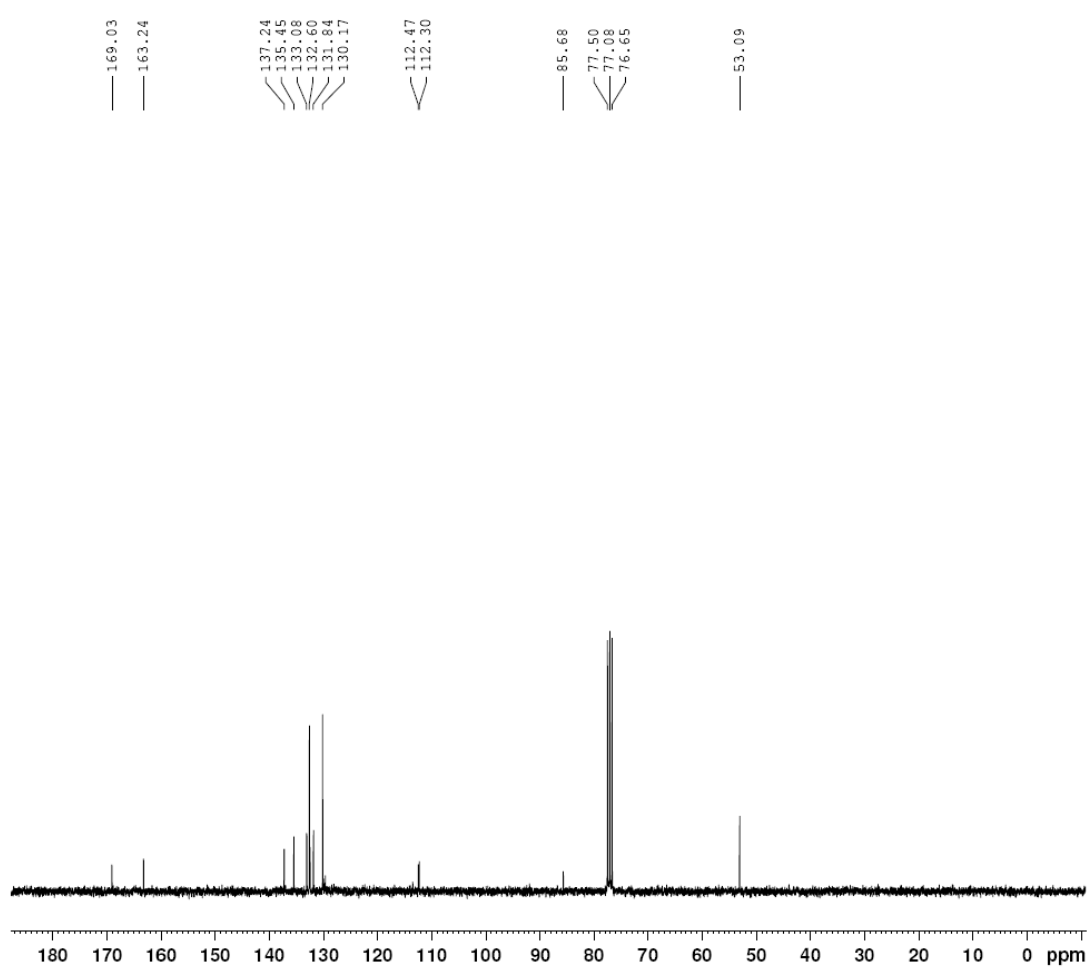

```
NAME Fudan-2011-3-4-c
EXPNO 1
PROCNO 1
F2 - 20110304
Time 17.17
INSTRUM pmw-c
PROBHD 5 mm PABBO BB-
PULPROG zgpg30
TD 65536
SOLVENT CDCl3
NS 82
DS 4
SWH 18028.846 *
FIDRES 0.275098 *
AQ 1.6175818 *
RG 320
DM 27.733 *
DE 6.50 *
TE 287.9 *
D1 2.0000000 *
D11 0.0200000 *
TOS 1
----- CHANNEL f1 -----
NUC1 13C
P1 9.76 *
PL1 0.00 *
PLM 20.3807051 *
PR1 75.4752063 *
----- CHANNEL f2 -----
CPDPRG2 waltz16
NUC2 1H
PCPD2 80.00 *
PL2 5.00 *
PL12 17.00 *
PL13 17.00 *
PL14 17.00 *
PL15 0.17620444 *
PL16 0.2304613 *
PL17 0.2304613 *
PR2 300.1110000 *
SI 32768
SF 500.1364000 *
WDW EM
SSB 0
LB 1.00 *
GB 0
PC 1.40
```

**(4*S*,5*S*)-ethyl 3,3-dicyano-4-hydroxy-5-isopropyl-2-(4-methoxyphenyl)cyclohex-1-enecarboxy**

late: 5a

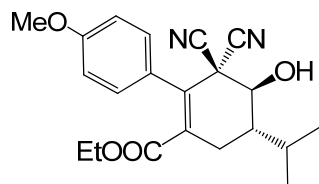

7.292  
7.285  
7.270  
7.263  
6.934  
6.928  
6.912  
6.905

4.167  
4.146  
4.129  
4.108  
3.954  
3.931  
3.907  
3.883  
3.868  
3.251  
3.238  
2.606  
2.586  
2.574  
2.534  
2.436  
2.398  
2.388  
2.374  
2.365  
2.352  
2.336  
2.198  
2.180  
2.160  
2.140  
2.120  
2.100  
2.080  
2.060  
2.040  
2.020  
2.004  
1.022  
1.009  
0.955  
0.914  
0.891  
0.868  
0.000

```
NAME      tudan-2011
EXPNO     1
PROCNO    1
Date_     2011
Time      1
INSTRUM   spect
PROBHD    5 mm PABBO
PULPROG   zgpg30
TD         65536
SOLVENT   CDCl3
NS         4096
DS         4
SWH        6188
FIDRES     0.05
AQ         5.285
RG         655
DN         80
DE         2
TE         300.2
D1         1.0000
TD0
===== CHANNEL f1
NUC1       13C
P1         1
PL1        0
FLM        zgpg30
SFO1       101.253
SI         1
SF         101.253
WDW        EM
SSB        0
LB         0
GB         0
FC         0
```

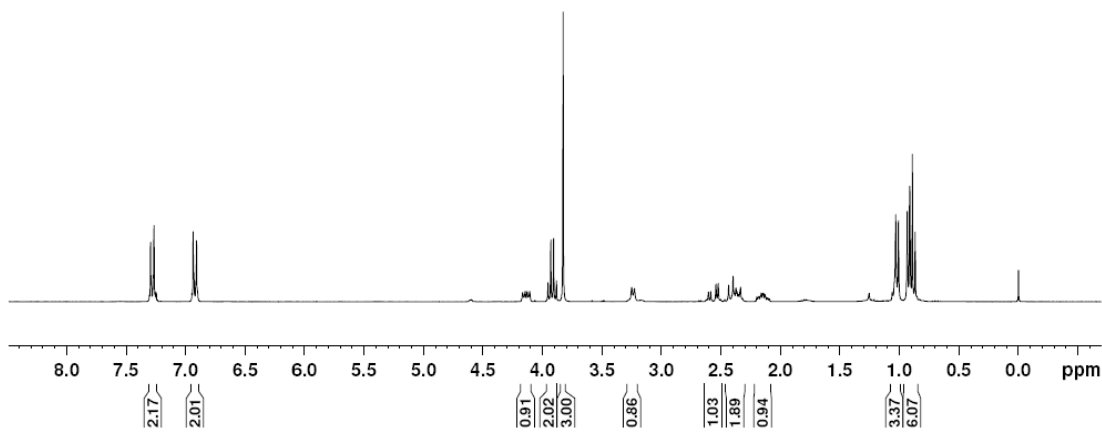

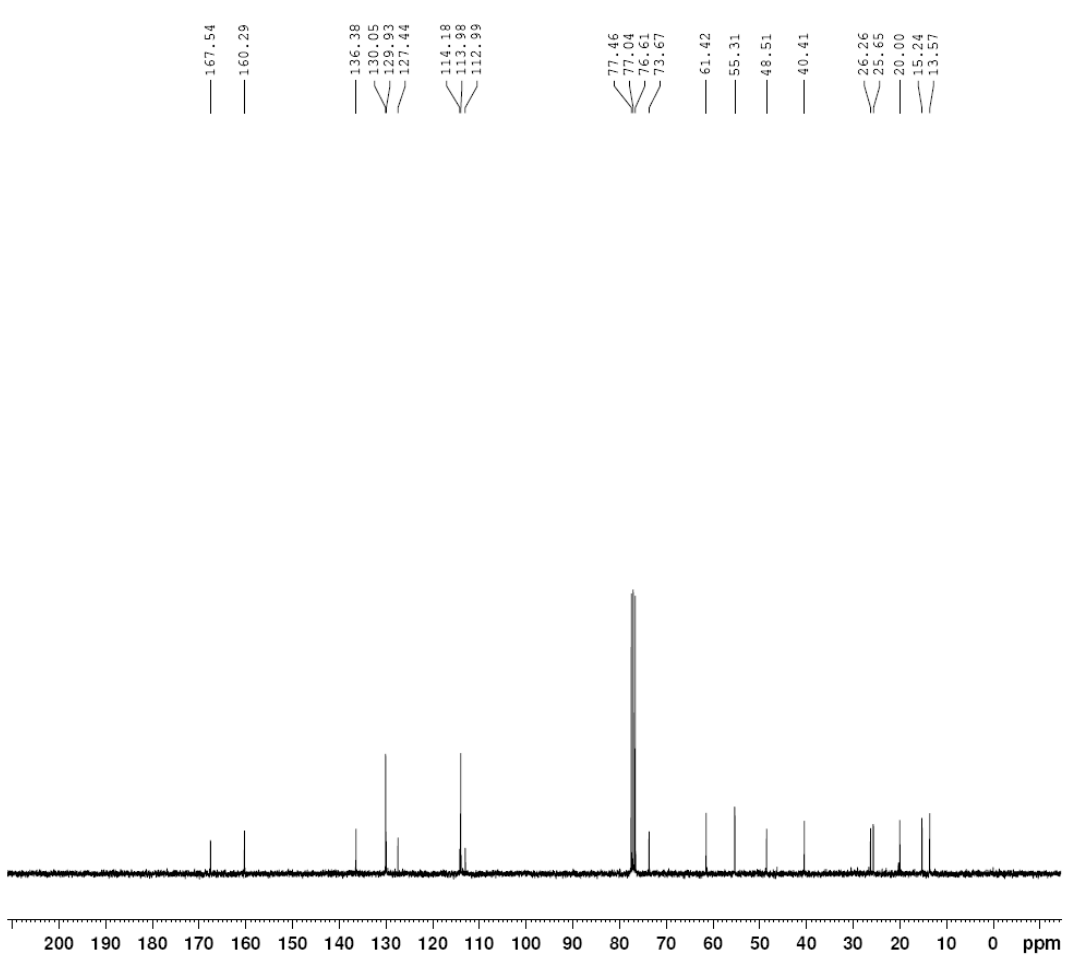

(4*S*,5*S*)-ethyl 3,3-dicyano-4-hydroxy-5-isopropyl-2-phenylcyclohex-1-enecarboxylate: **5b**

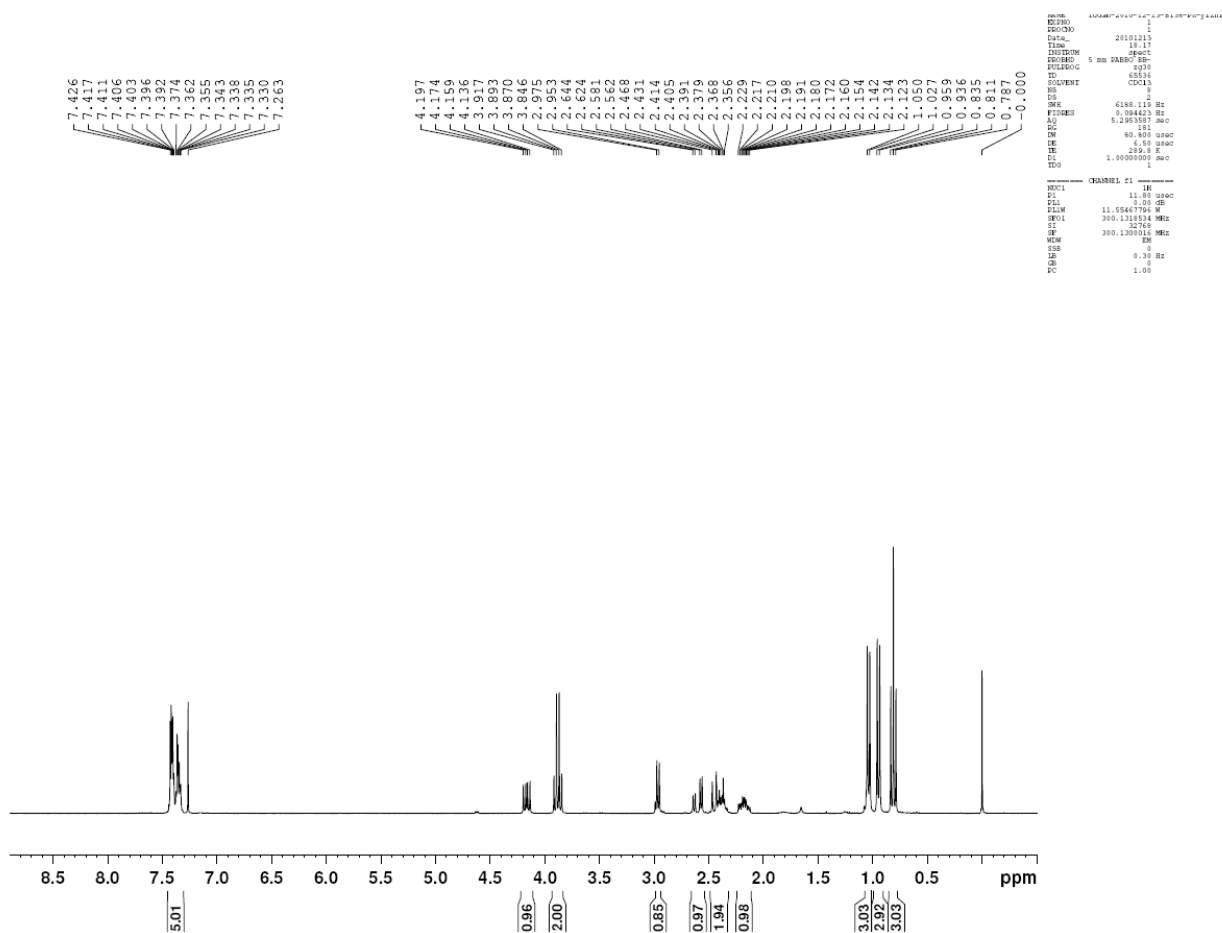

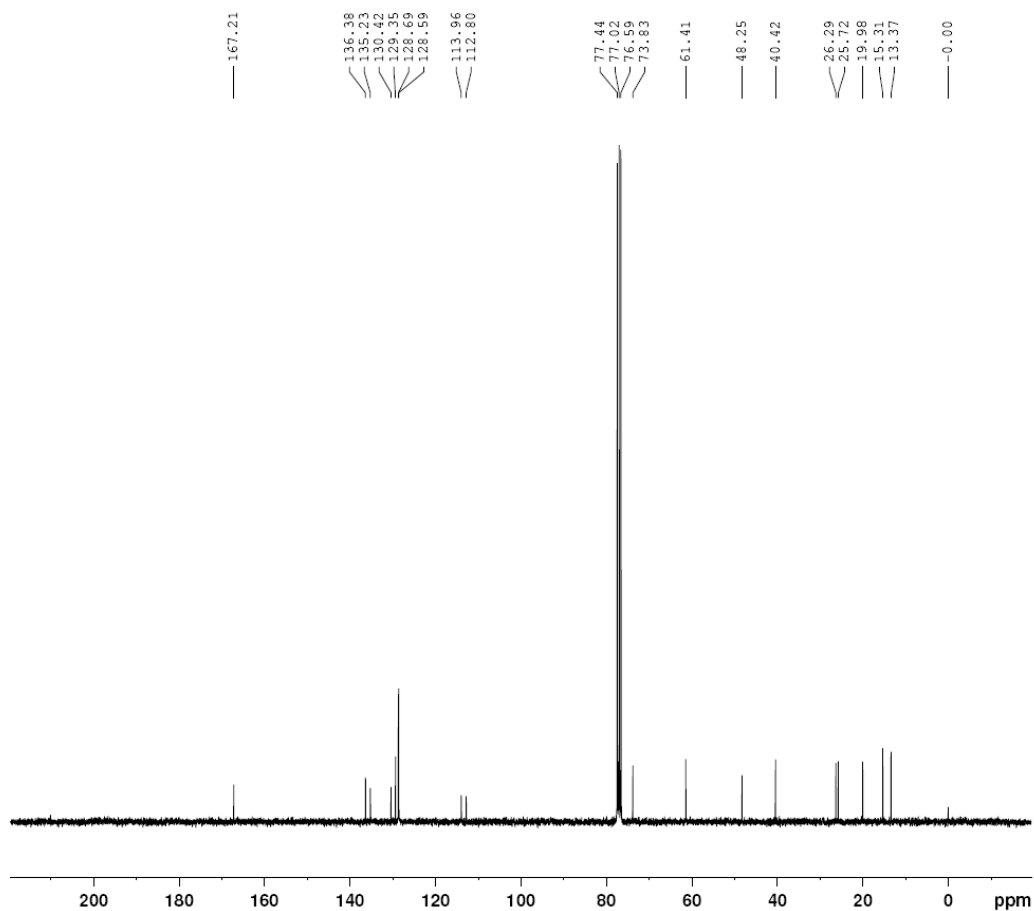

```

NAME fudm-2010-12-15-B138-Pb-y1
EXPNO 1
PROCNO 20101213
DELTA 19.07
PROCRES 19.07
PROCESSTIME 5 H 58M 56S
PULPROG zgpg30
RG 327.54
SOLVENT CDCl3
NS 1654
DS 4
SWH 14028.444 Hz
FIDRES 8.275898 Hz
AQ 1.637918 sec
RG 27.503
SQ 6.50 umsc
DE 246.0 Hz
TE 300.2 K
D1 2.0000000 sec
d11 0.3000000 sec
TD 1

===== CHANNEL f1 =====
NUC1 13C
P1 8.33
PL1 0.00 dB
PLA 0.00 dB
PLM 20.3887501 W
SFO1 76.4702503 MHz

===== CHANNEL f2 =====
CPDPRG2 waltz16
NUC2 1H
P2 0.00 umsc
PL2 1.00 dB
PLA 17.00 dB
PLM 17.00 dB
PLM2 8.1762044 W
PLM3 0.23854613 W
SFO2 300.1312005 MHz
SI 327.54
SFO 76.4677497 MHz
GB 0
LB 1.00 Hz
GB 0
PC 1.40
    
```



**(4*S*,5*S*)-ethyl 3,3-dicyano-4-hydroxy-5-isopropyl-2-(naphthalen-1-yl)cyclohex-1-enecarboxy**

late: **5c**

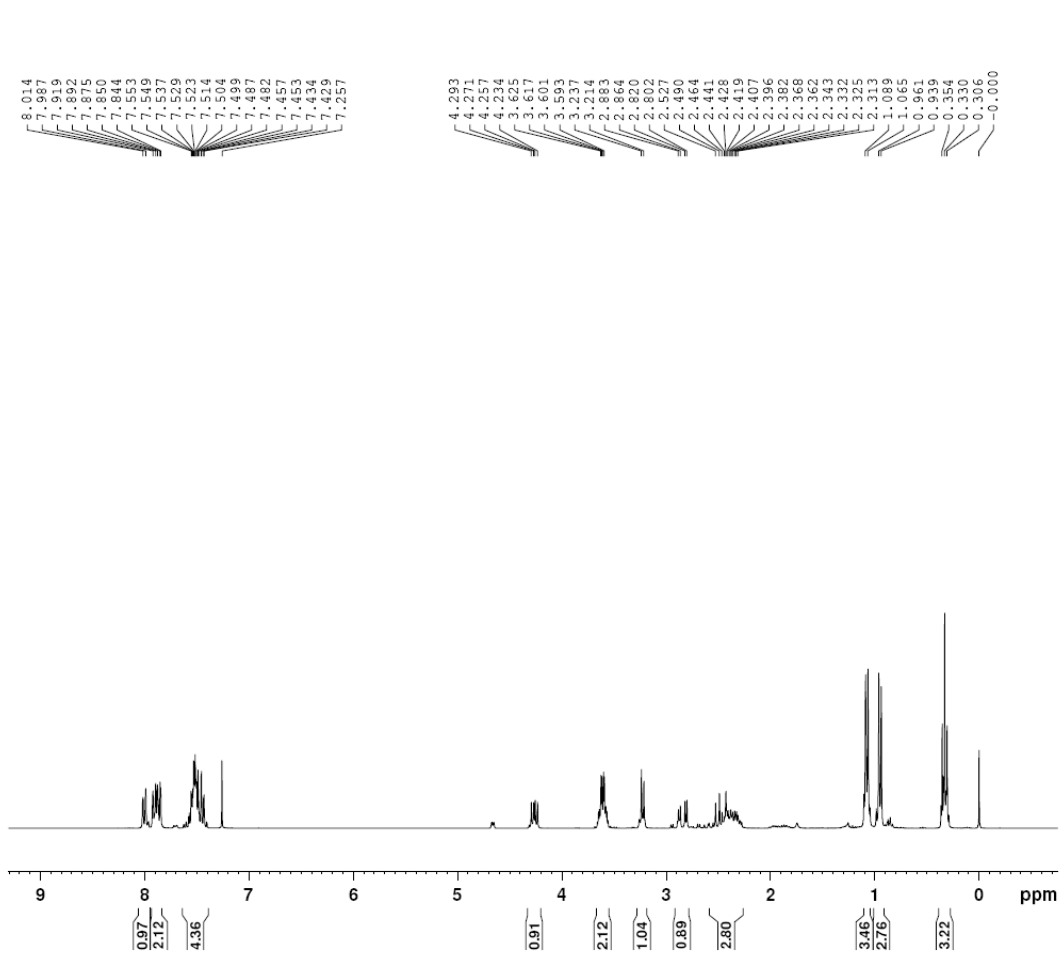

```

NAME      1
EXPNO    1
PROCNO   1
SOLVENT  21010121
TIME     12.00
SYSTEM   500C
PROBHD   5 mm DABBO BB-
PULPROG  zgpg30
TD        65536
SOLVENT  CDCl3
NS        2
DS        4
F2       6188.119 Hz
FIDRES   0.084420 Hz
AQ        1.1885181 sec
RG        64
RW        80.800 usec
RE        6.50 usec
TE        298.2 K
D1        1.00000000 sec
D11
===== CHANNEL f1 =====
NUC1      1H
P1        12.00 usec
PL1       0.00 dB
PL12     11.51461796 dB
SFO1      300.1314524 MHz
SI        32768
SF        300.1300034 MHz
WDW       EM
SSB       0 Hz
GB        0 Hz
PC        1.00
    
```

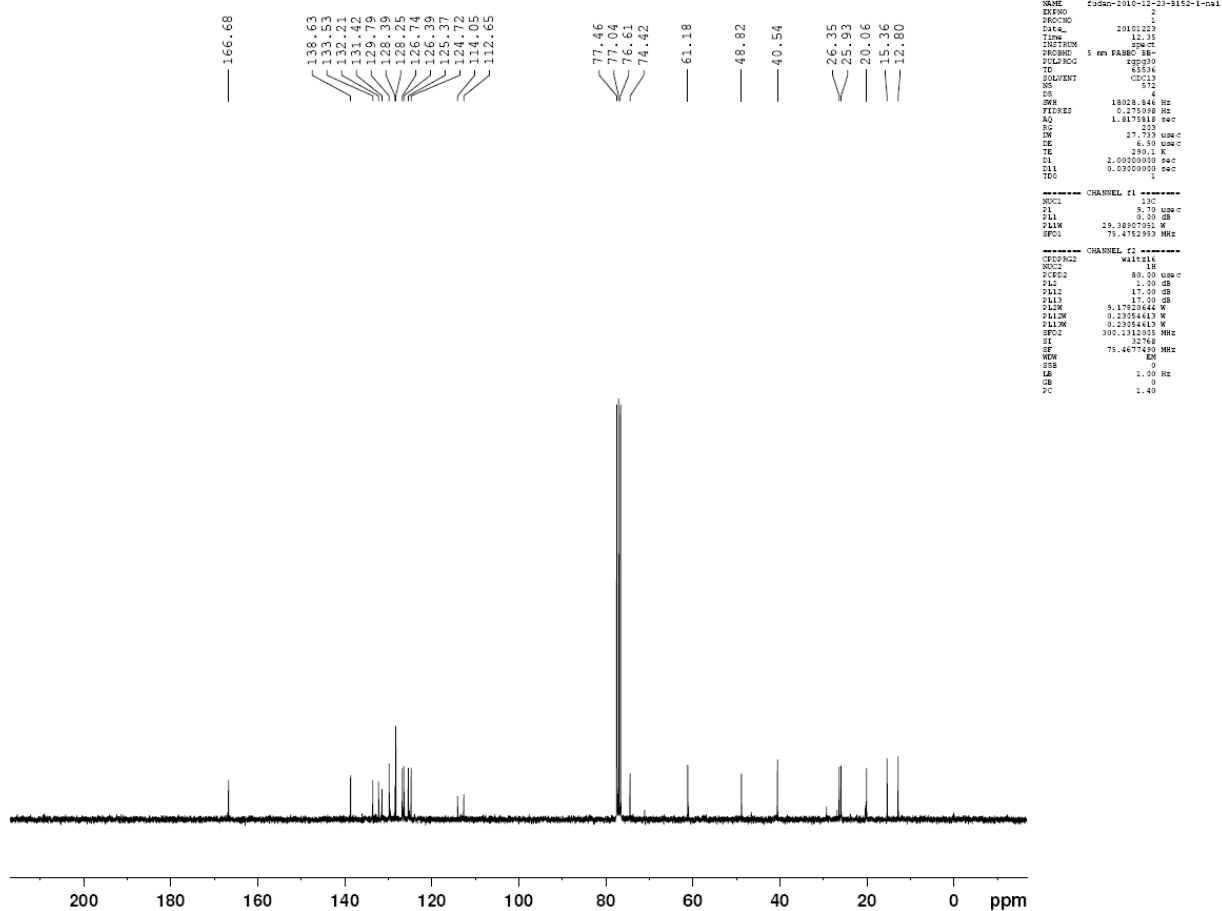

**(4*S*,5*S*)-ethyl 3,3-dicyano-4-hydroxy-5-isopropyl-2-p-tolylcyclohex-1-enecarboxylate: 5d**

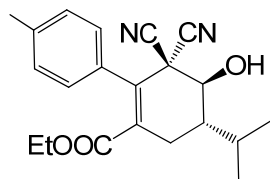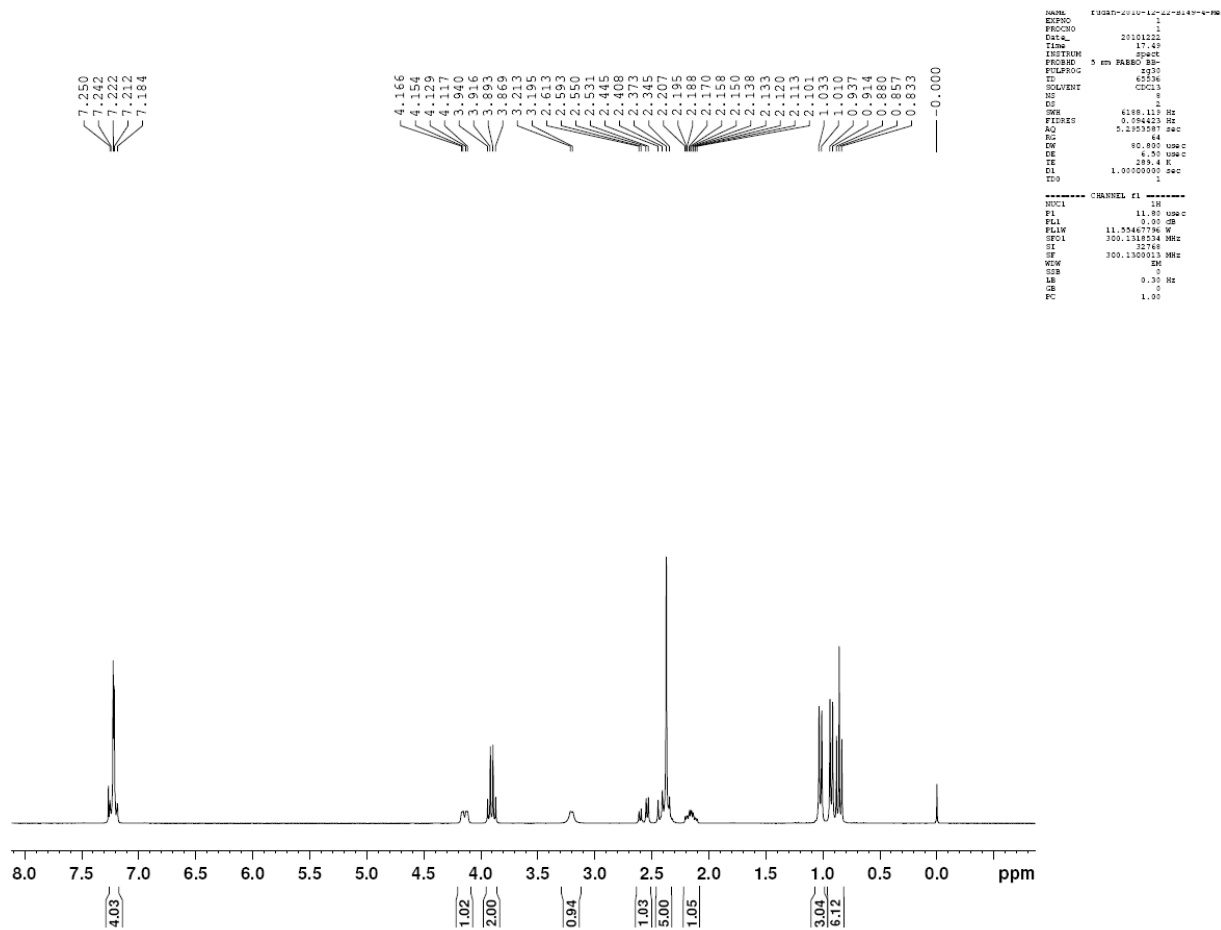

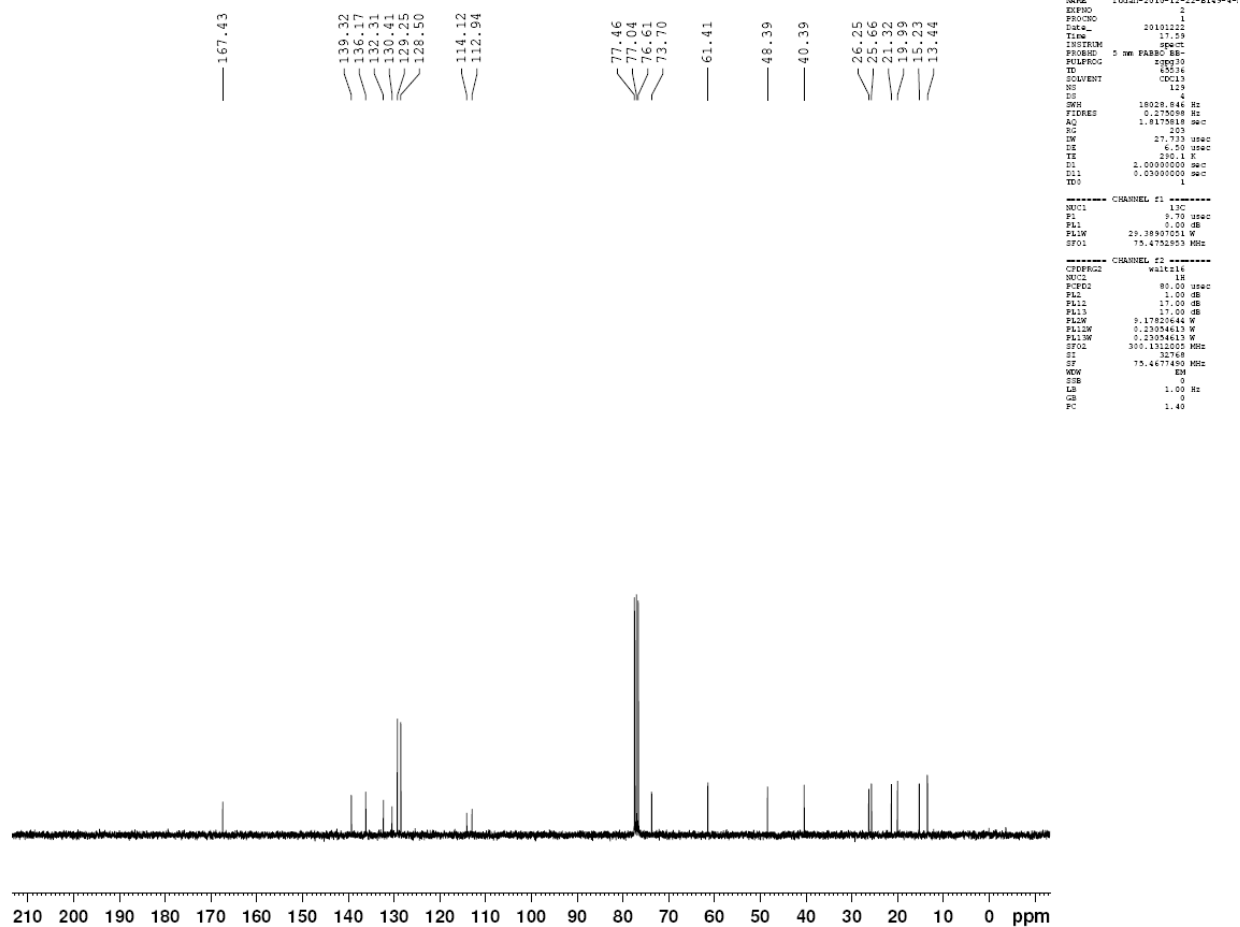



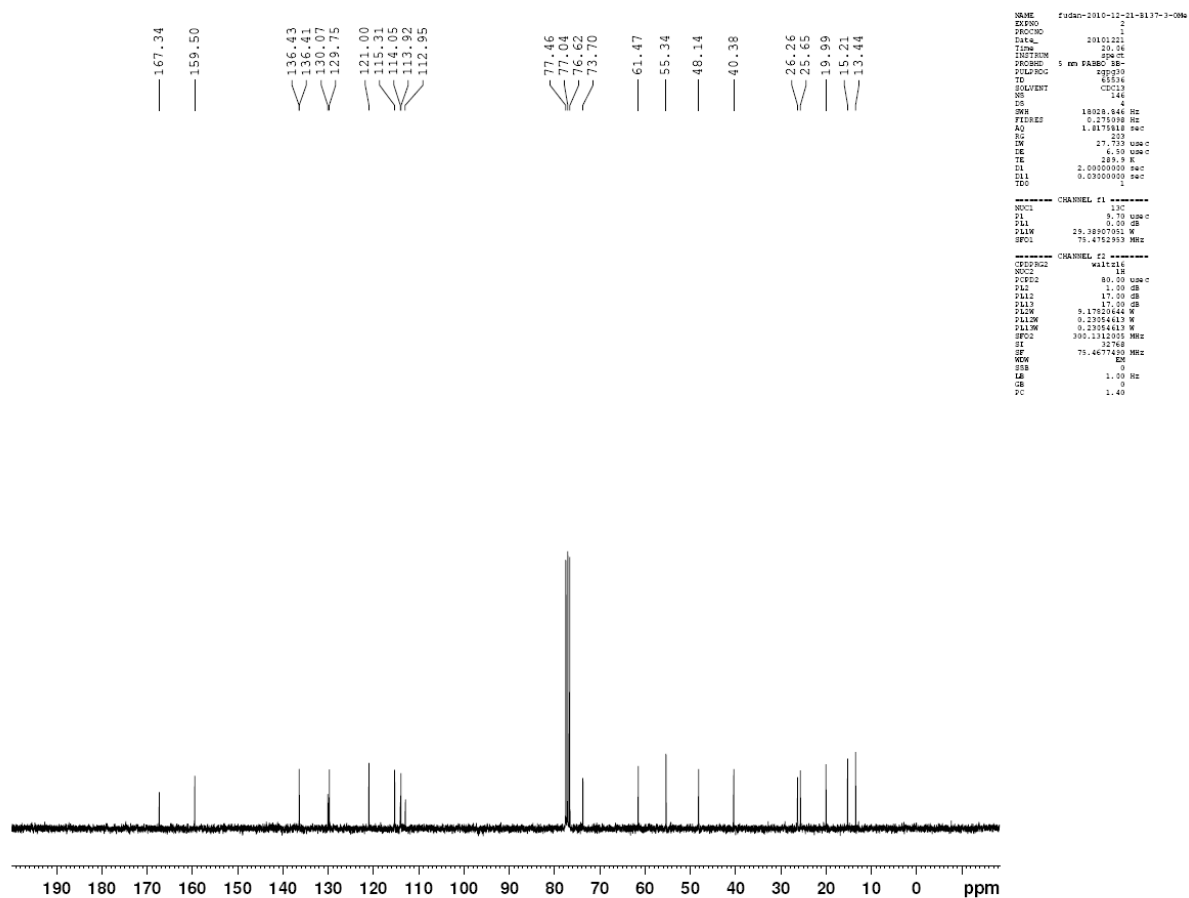

**(4S,5S)-ethyl 3,3-dicyano-4-hydroxy-5-isopropyl-2-m-tolylcyclohex-1-enecarboxylate: 5f**

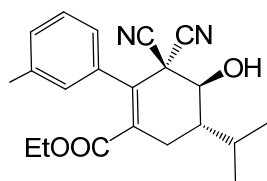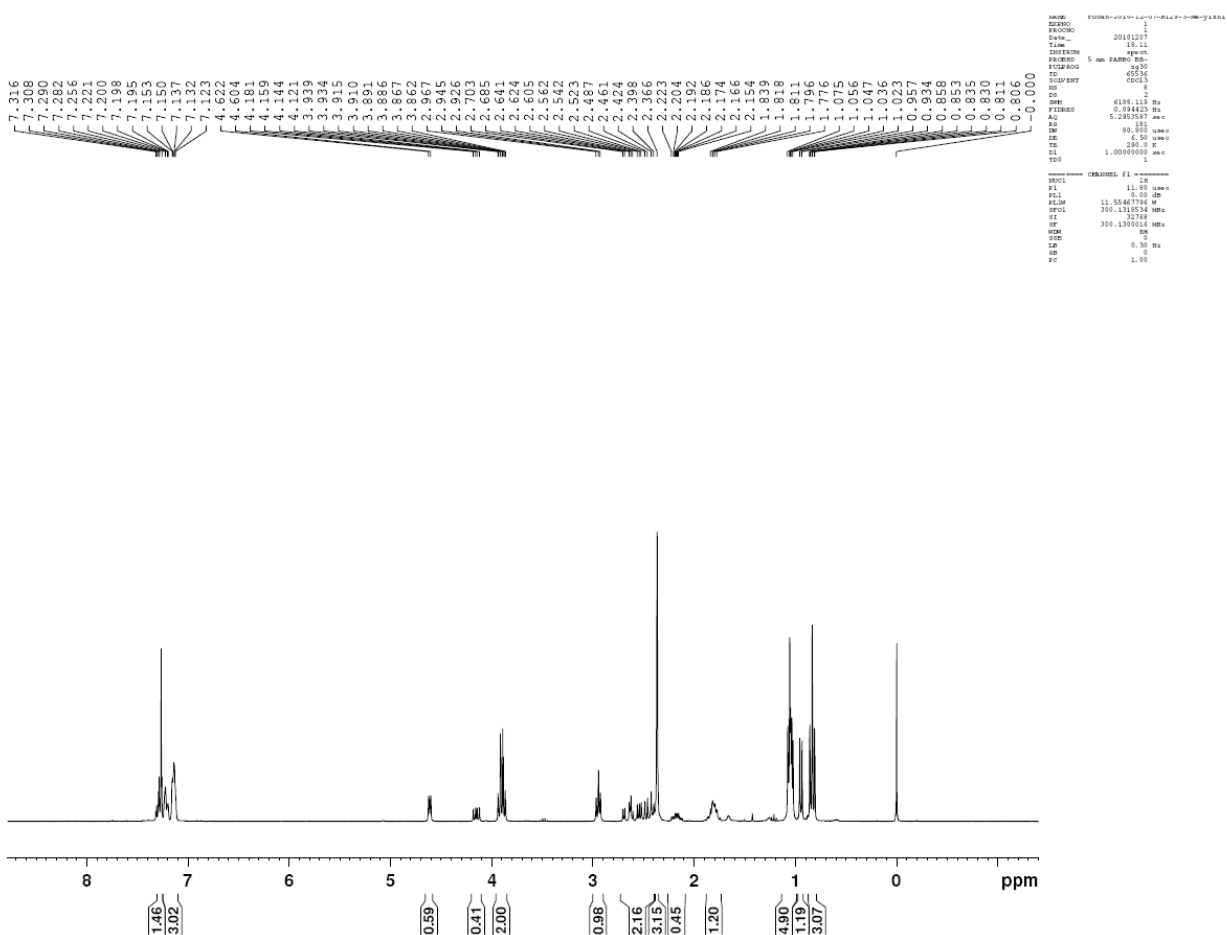

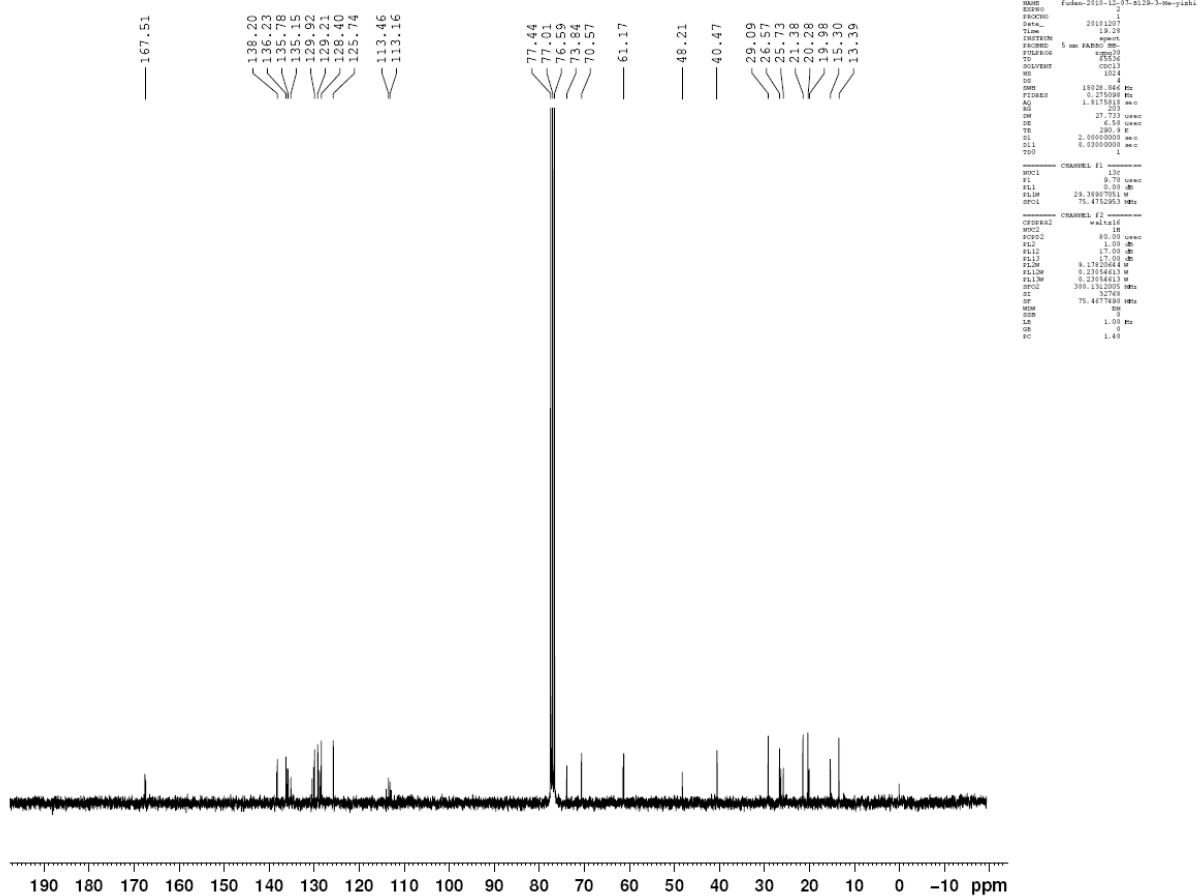



**(4*S*,5*S*)-ethyl 3,3-dicyano-4-hydroxy-5-isopropyl-2-*o*-tolylcyclohex-1-enecarboxylate: 5g**

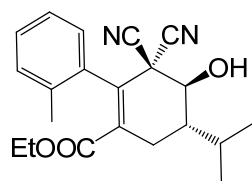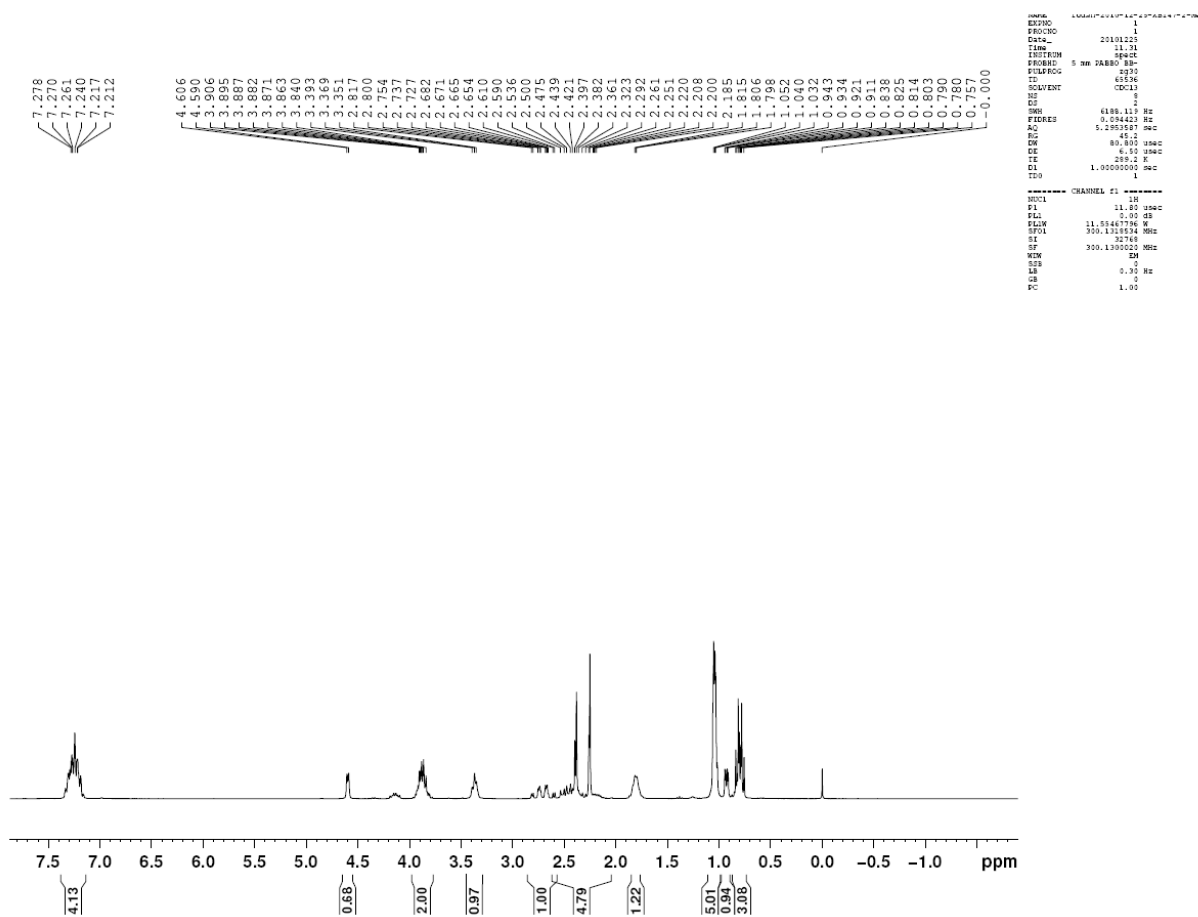

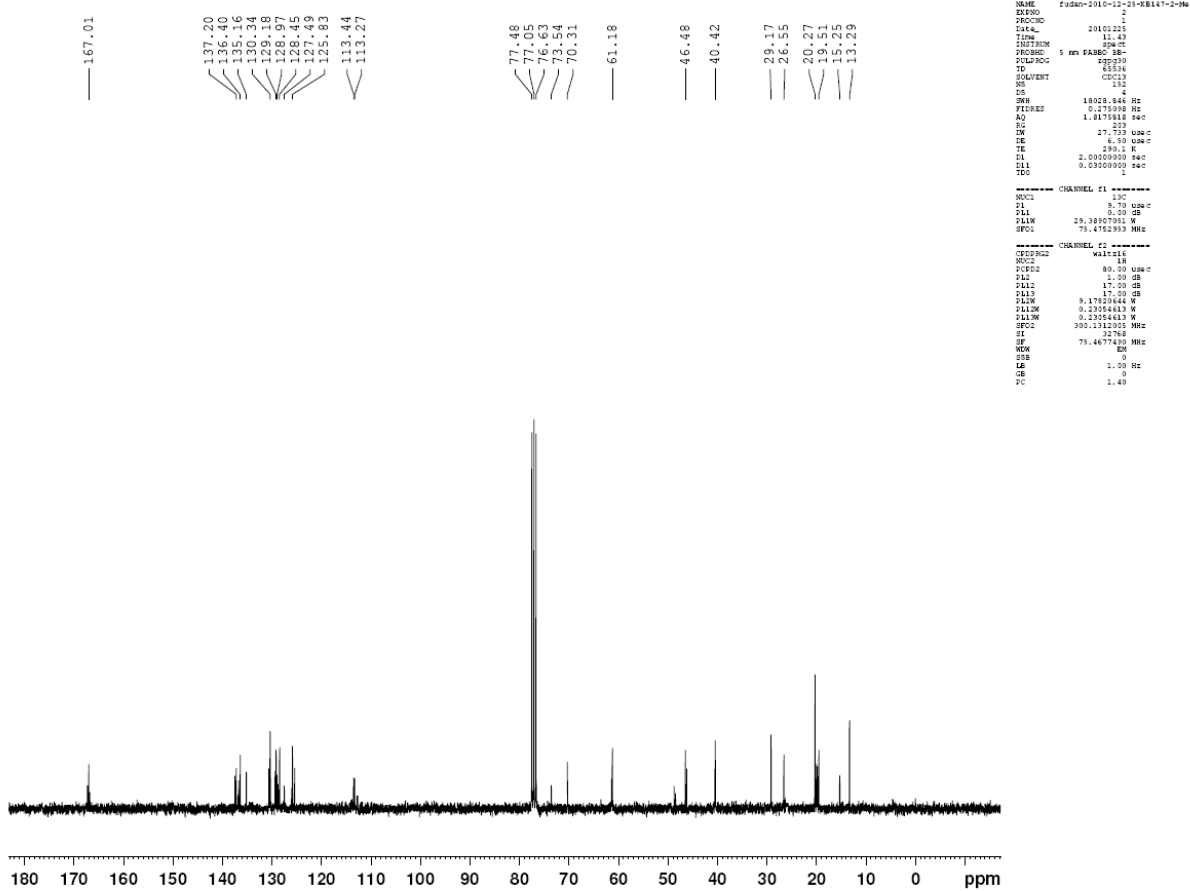

(4*S*,5*S*)-ethyl 2-(4-bromophenyl)-3,3-dicyano-4-hydroxy-5-isopropylcyclohex-1-enecarboxyla

te: 5h

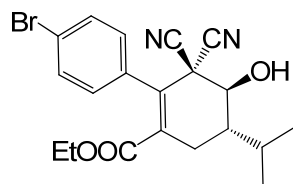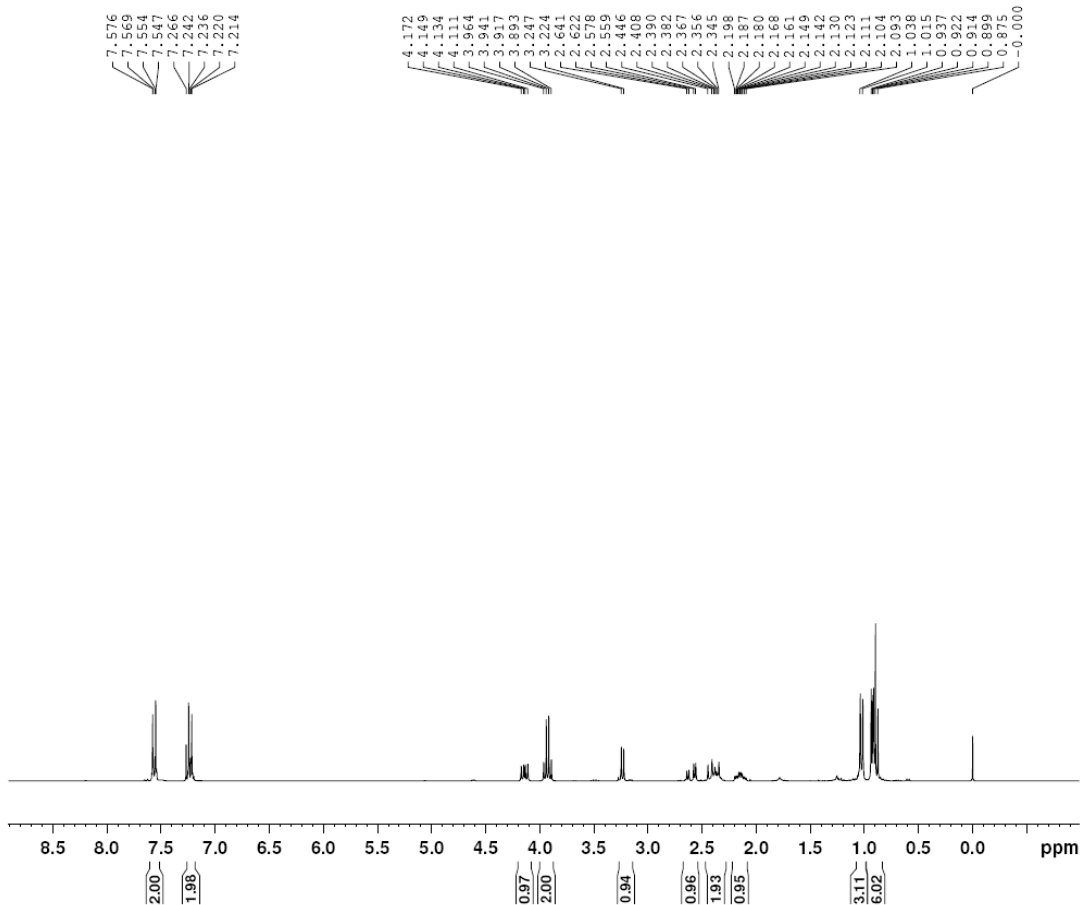

```
NAME: 10050-2910-1
EXPNO:
PROCNO:
Date_: 201012
Time: 20.
INSTRUM:
PROBHD: 5 mm PABBO 1H
PULPROG: zgpg30
TD: 655
SOLVENT: CDCl3
NS:
DS:
SWH: 6188.11
FIDRES: 0.0944
AQ: 5.295351
RG:
CW:
DE: 80.81
TE: 6.1
D1: 286.
D11: 1.0000001
TDO:
===== CHANNEL f1 =====
NUC1:
P1: 11.1
PL1: 0.1
PL12: 11.5546771
SFO1: 300.13185
SI: 3276
SF: 300.130001
NMR:
SSB:
LB: 0.1
GB:
PC: 1.1
```

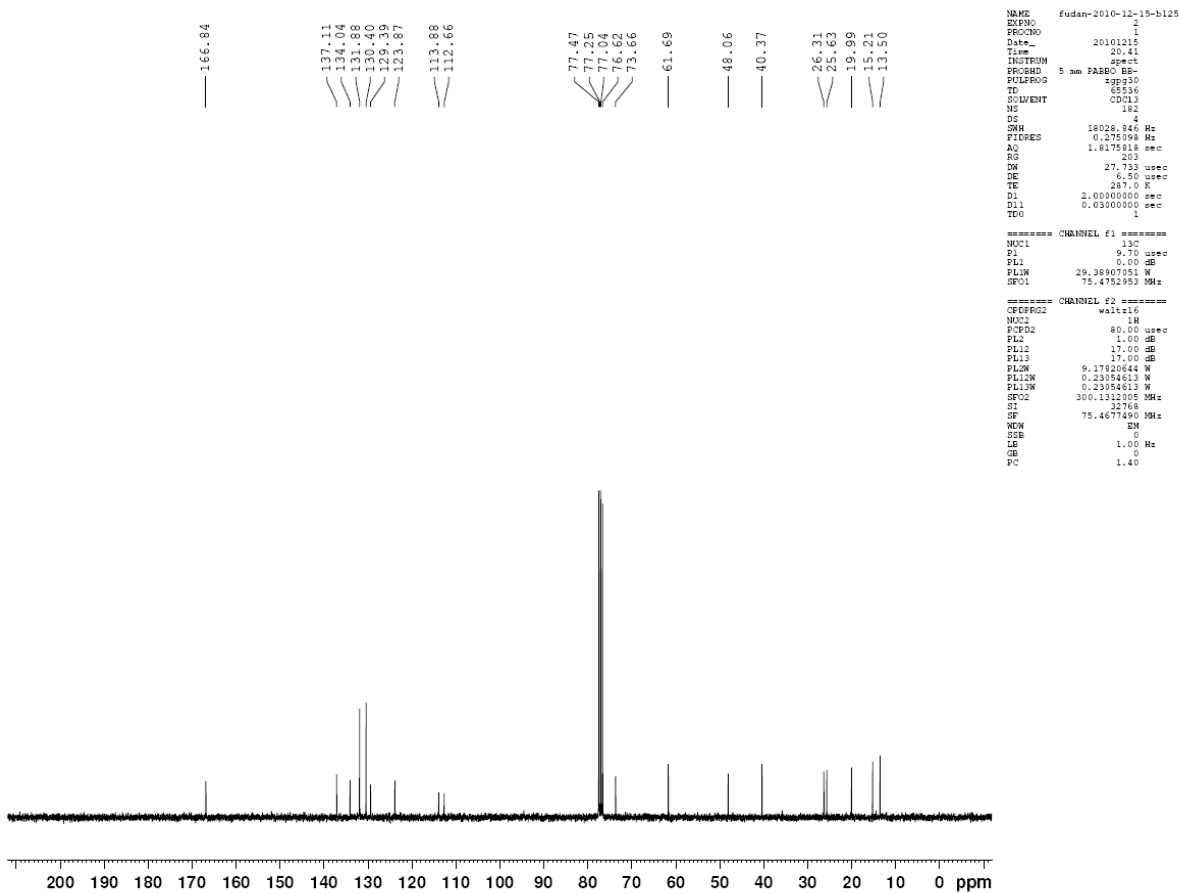

(4*S*,5*S*)-ethyl 2-(4-chlorophenyl)-3,3-dicyano-4-hydroxy-5-isopropylcyclohex-1-enecarboxylate: 5i

te: 5i

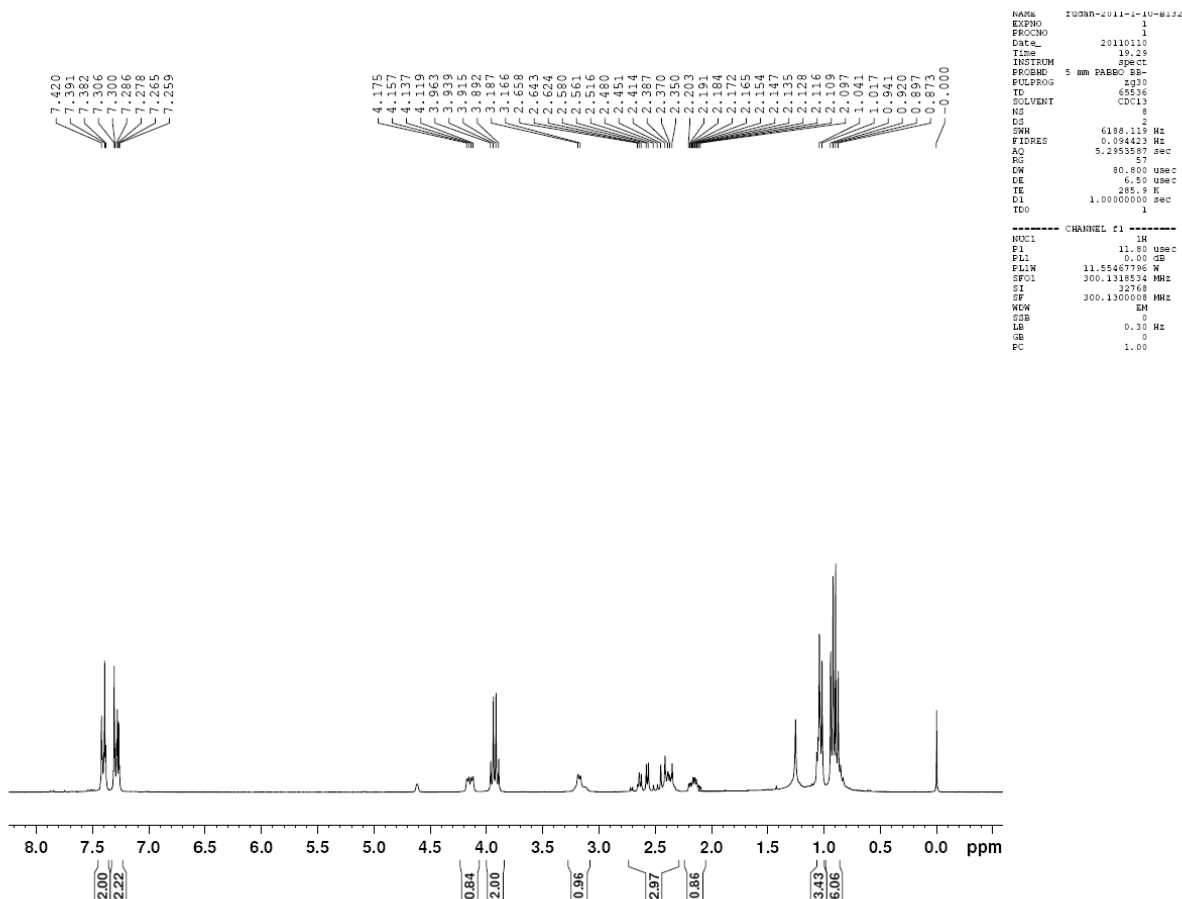

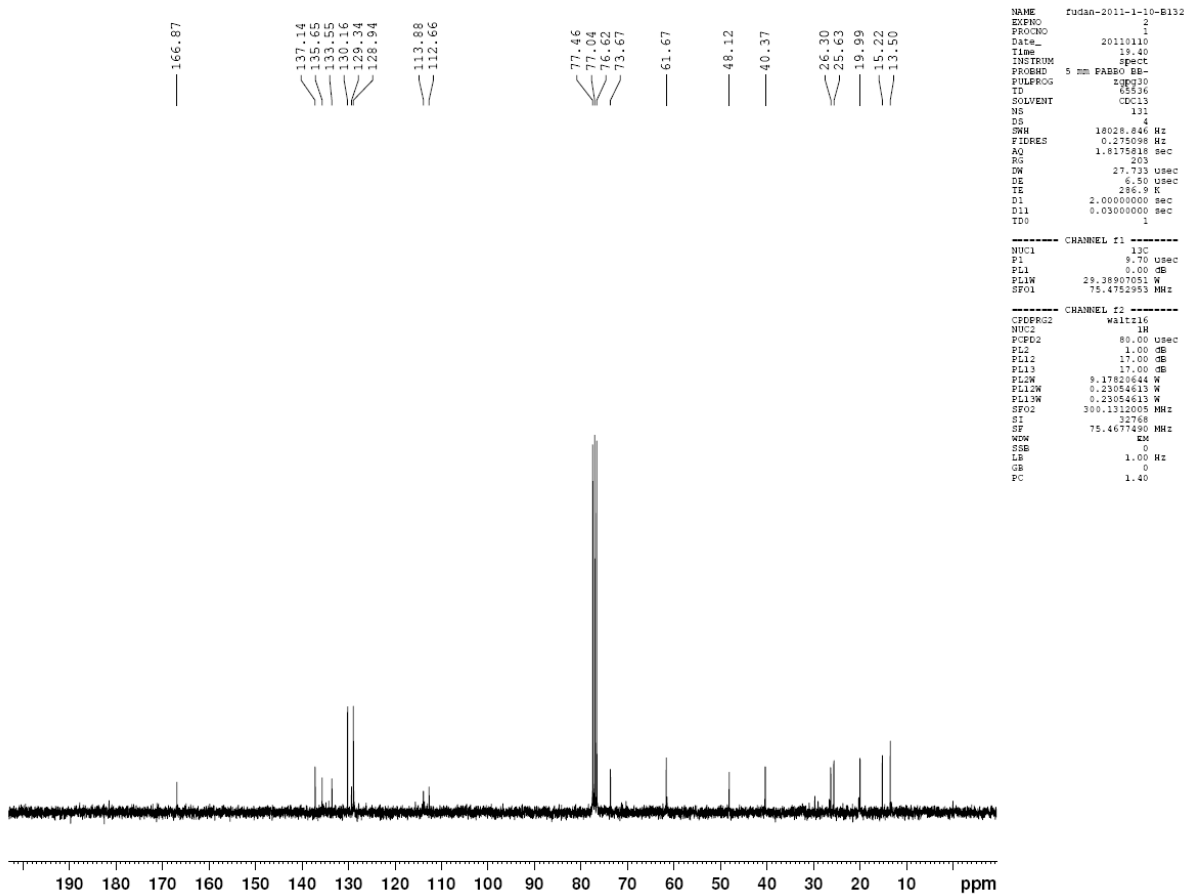



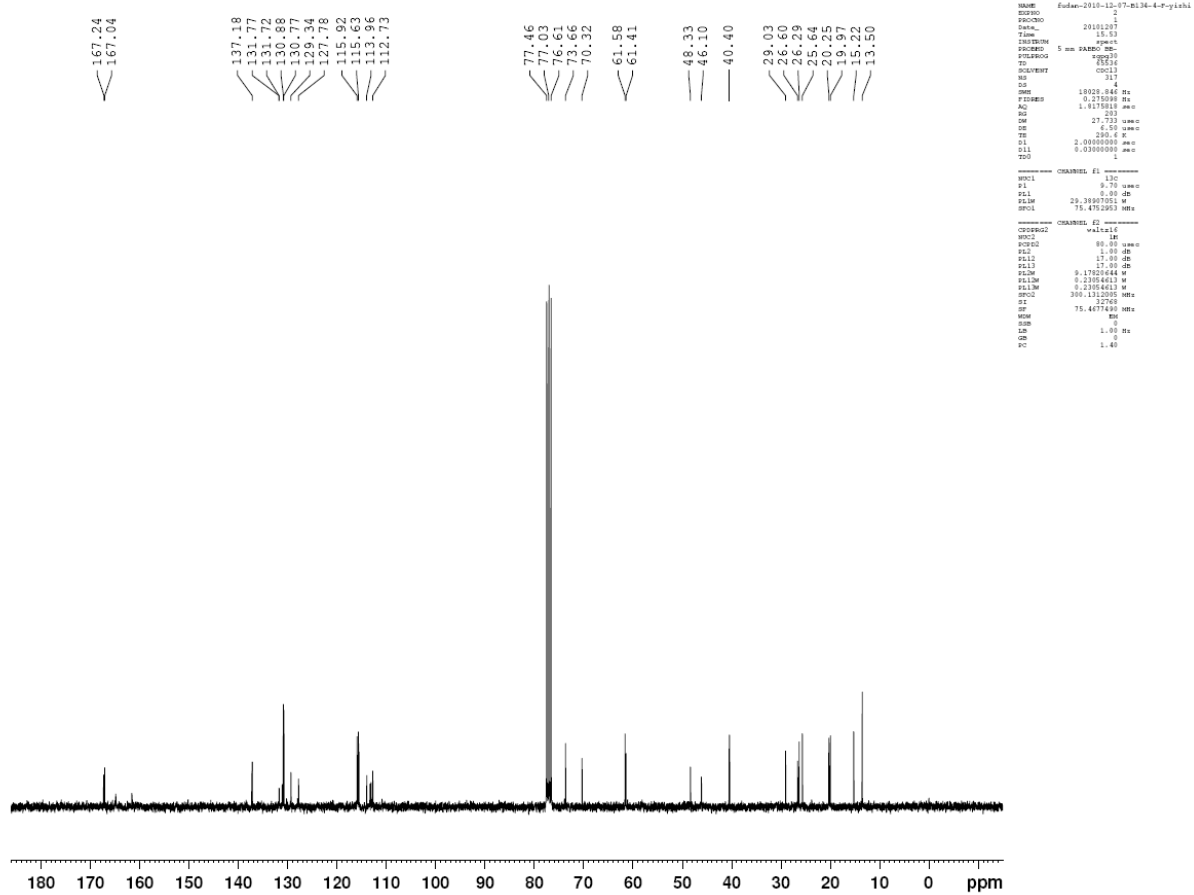



**(4S,5S)-ethyl 3,3-dicyano-4-hydroxy-5-isopropyl-2-(4-(trifluoromethyl)phenyl)cyclohex-1-enecarboxylate: 5k**

ecarboxylate: 5k

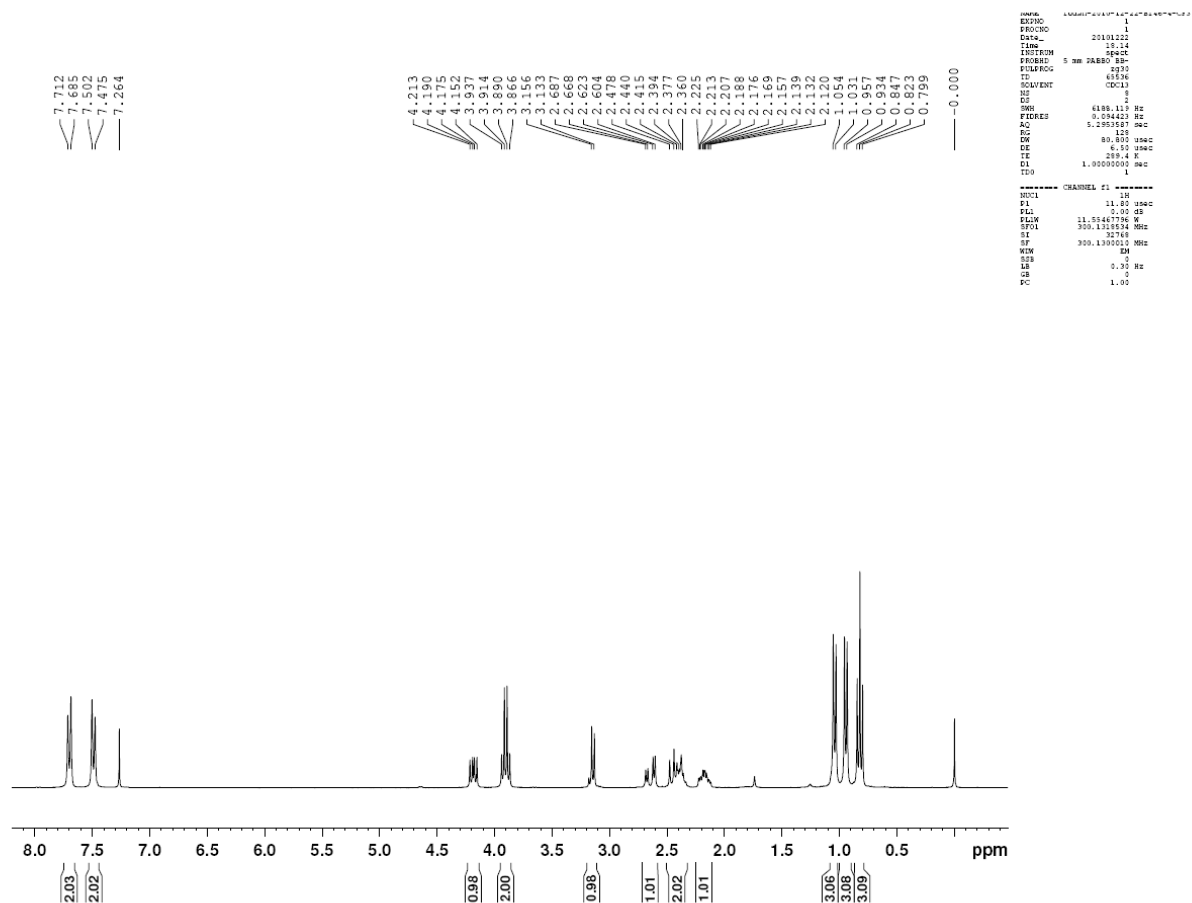

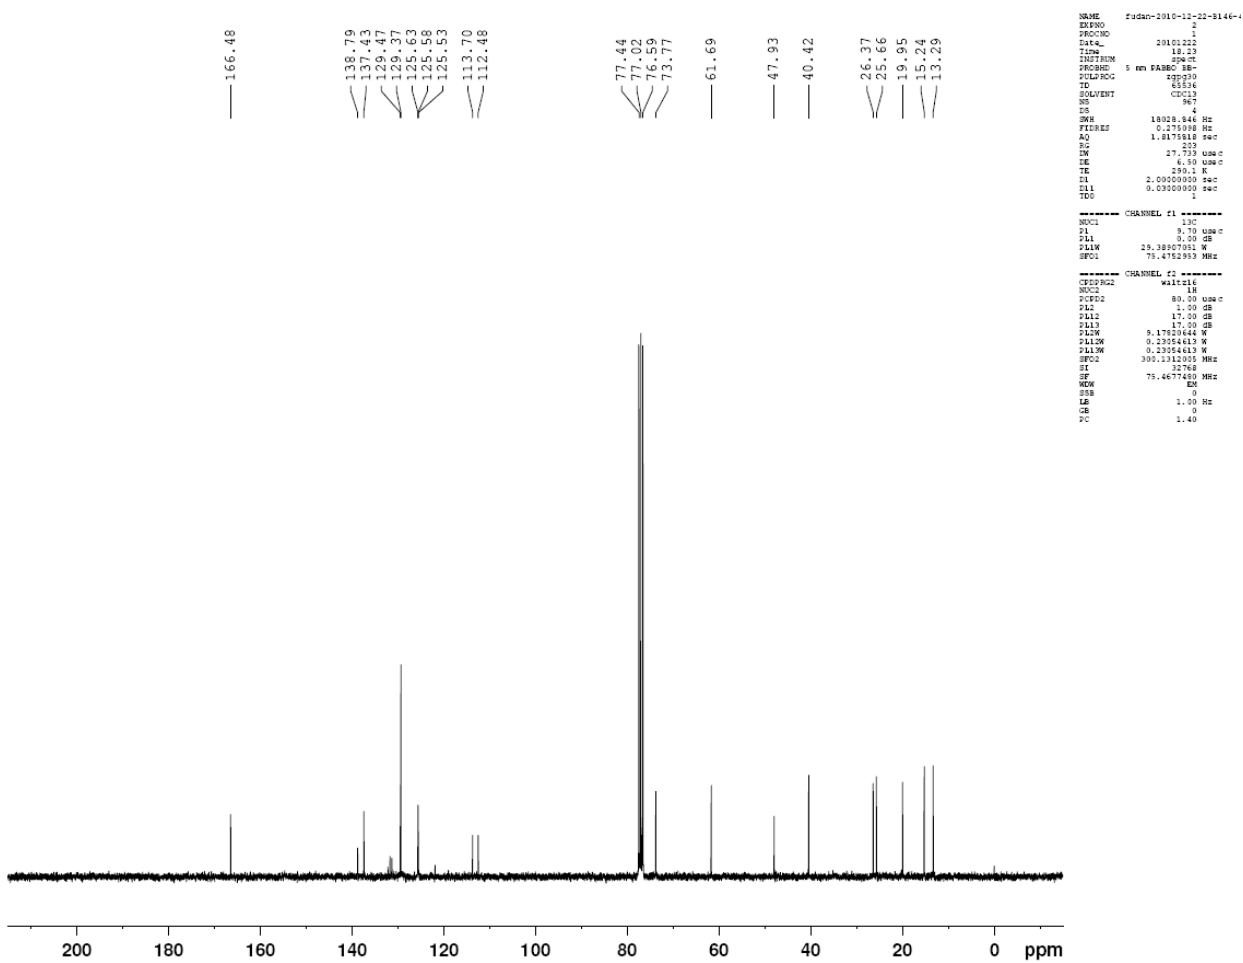

(4S,5S)-ethyl 2-(3-bromophenyl)-3,3-dicyano-4-hydroxy-5-isopropylcyclohex-1-enecarboxylate

te: 5l

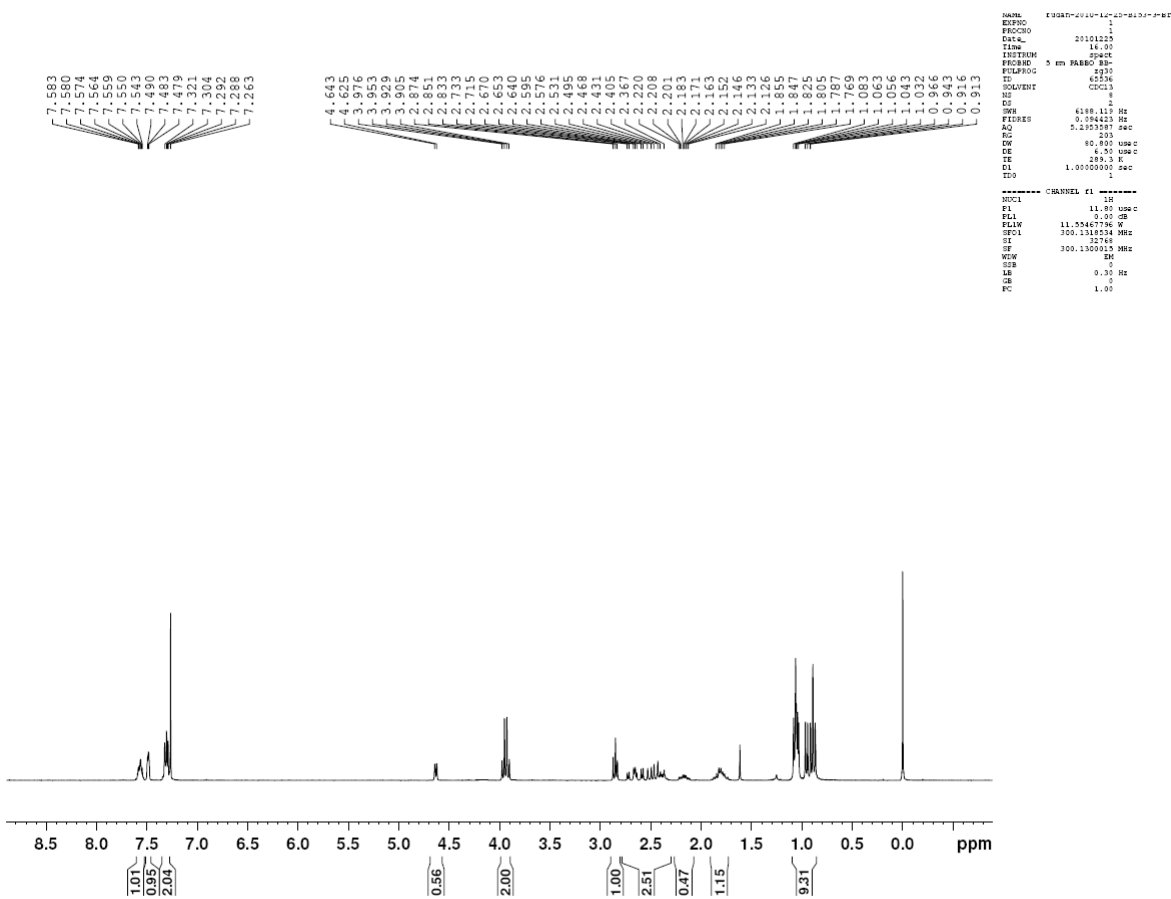

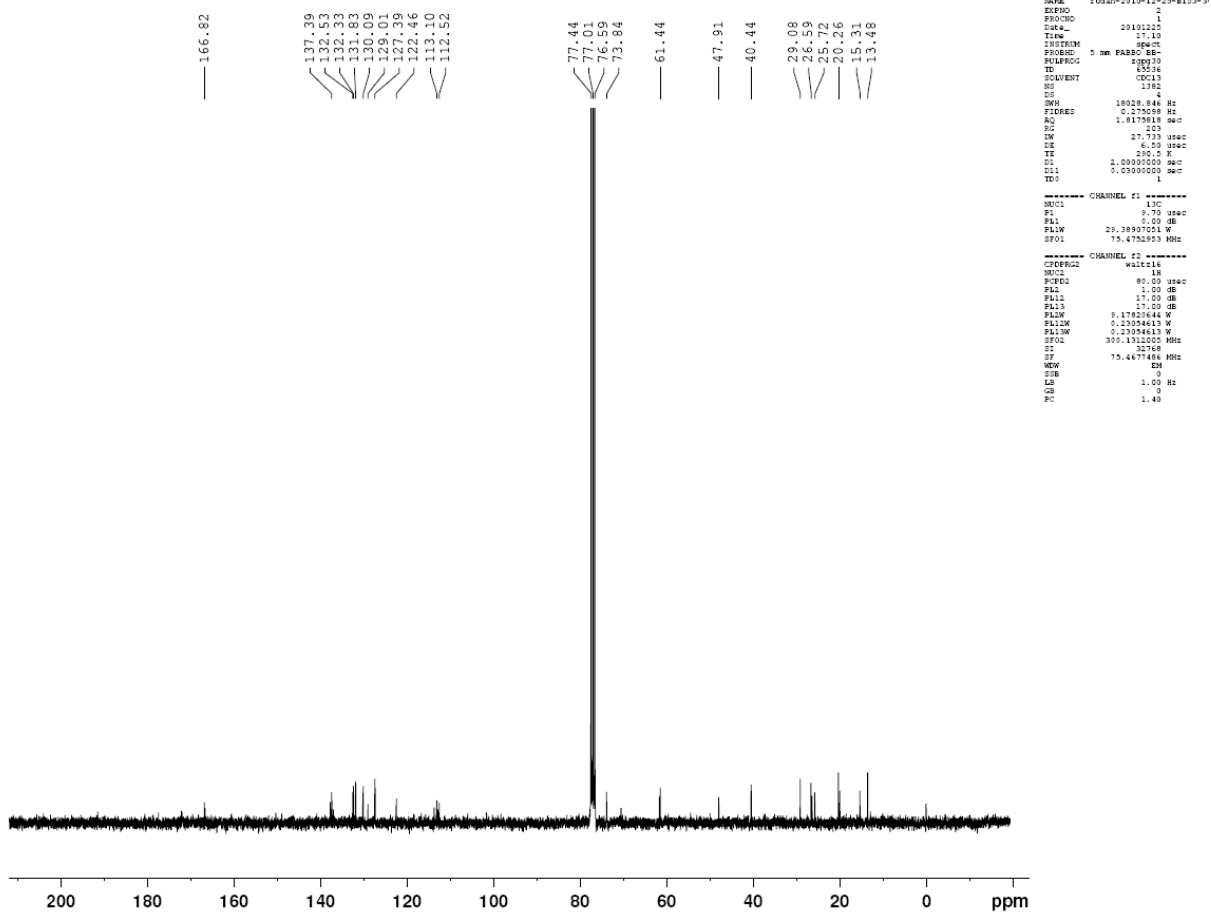

(4*S*,5*S*)-ethyl 2-(3-chlorophenyl)-3,3-dicyano-4-hydroxy-5-isopropylcyclohex-1-enecarboxyla

te: 5m

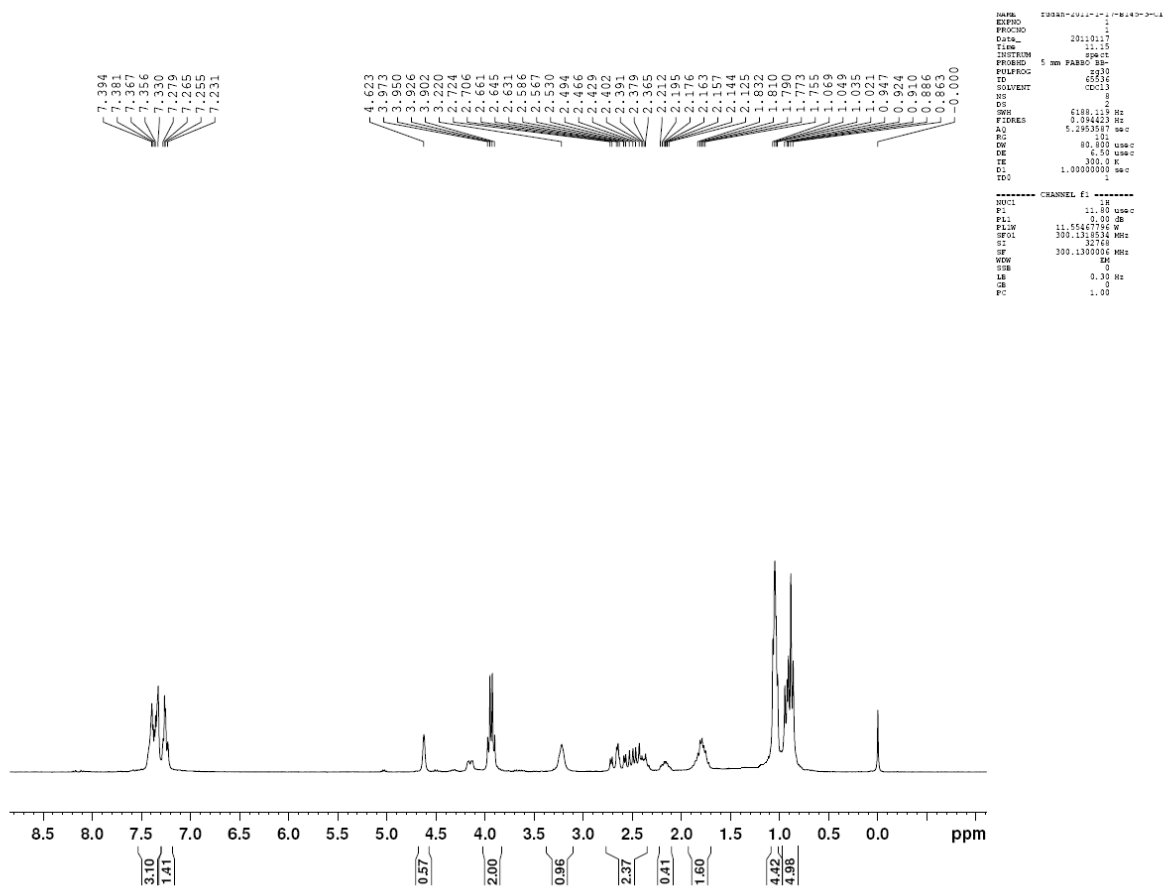

2011-1-17-B145-3-C1

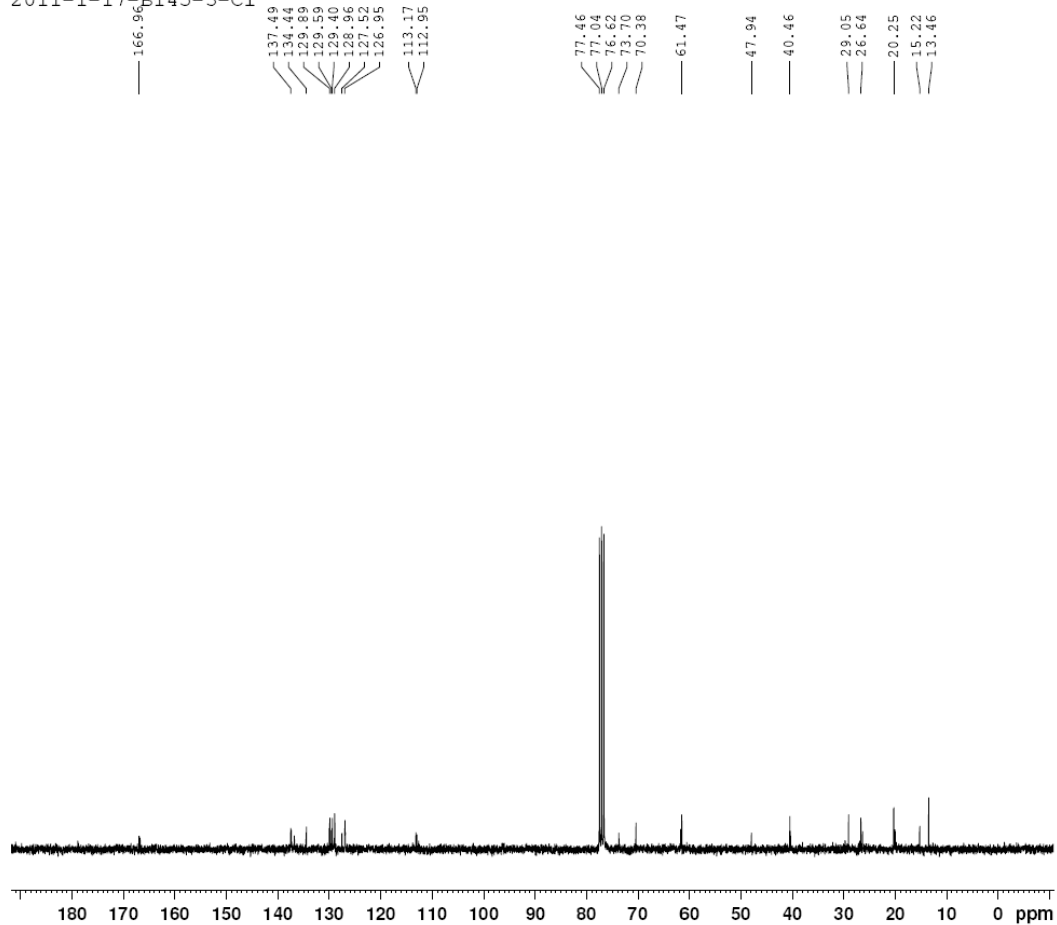

```
NAME fudan-2011-1-17-B145-3-
EXPNO 1
PROCNO 1
Date_ 20110117
Time 11.22
INSTRUM spect
PROBHD 5 mm PABBO BB-
PULPROG zgpg30
TD 65536
SOLVENT CDCl3
NS 231
DS 4
SWH 18028.846 Hz
FIDRES 0.275898 Hz
AQ 1.8175818 sec
RG 403
RW 27.733 usec
DE 6.50 usec
TE 300.2 K
D1 2.00000000 sec
D12 0.33000000 sec
TD0 1
----- CHANNEL f1 -----
NUC1 13C
P1 1.00
PL1 9.70 usec
PLW 0.00 dB
PLW1 29.36807851 W
SFO1 75.4752953 MHz
----- CHANNEL f2 -----
CPDPRG2 waltz16
NUC2 1H
PCPD2 80.00 usec
PL2 1.00 dB
PLW2 17.00 dB
PLW3 17.00 dB
PLW4 9.17820644 W
PLW5 0.23854613 W
PLW6 0.23854613 W
SFO2 300.1314005 MHz
SF 75.4677480 MHz
WDW EM
SSB 0
LB 1.00 Hz
GB 0
PC 1.40
```



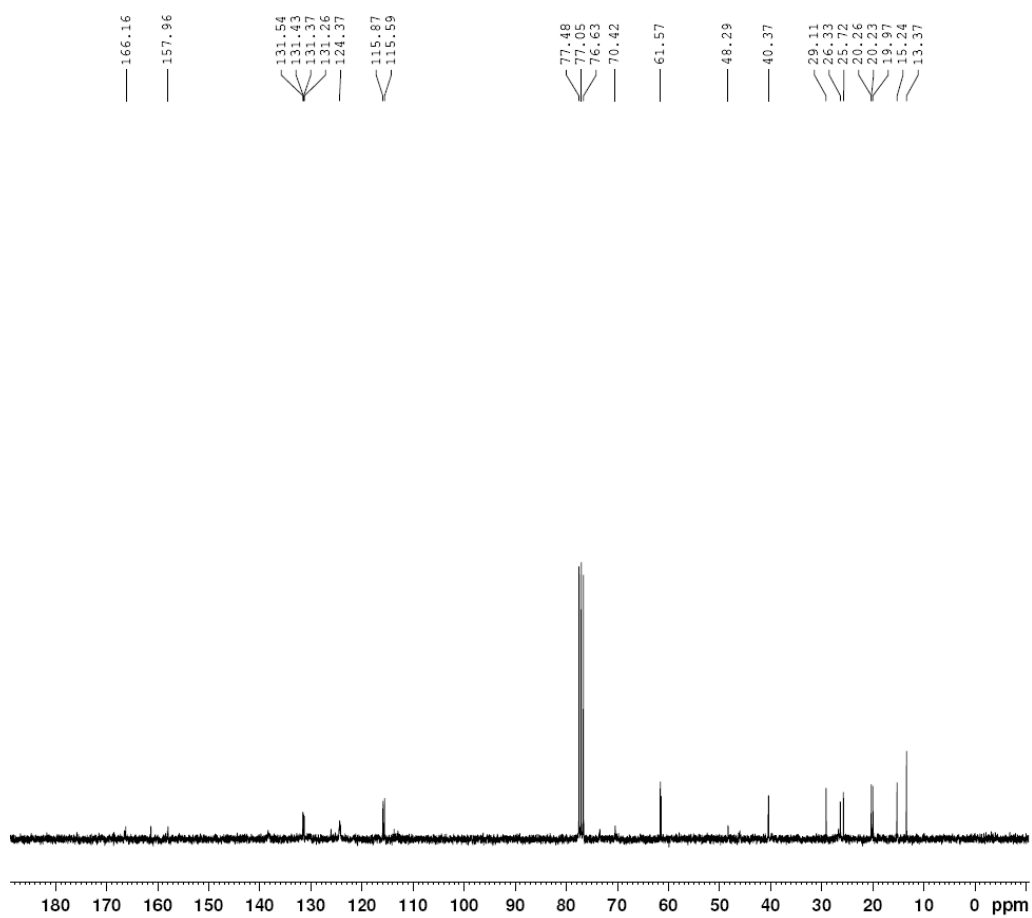

```
NAME Eufon-2010-12-07-0133-2-F-yishi
EXPNO 1
PROCNO 1
DATE_ 20101207
TIME 12.09
INSTRUM spect
PROBHD 5 mm PABBO 1H-
PULPROG zgpg30
TD 65536
SOLVENT CDCl3
NS 121
DS 4
SWH 18020.848 Hz
FIDRES 0.275039 Hz
AQ 1.917501 sec
RG 201
SQ 27.773 usec
SS 6.55 usec
TE 300.2 K
SI 2.00000000 usec
SFO 100.6283600 usec
TO 5
===== CHANNEL f1 =====
NUC1 13C
P1 9.70 usec
PL 0.00 dB
PL1 20.00000000 dB
RF1 75.4752953 MHz
===== CHANNEL f2 =====
NAME2 waltz16
NUC2 1H
P2 80.00 usec
PL2 1.00 dB
PL12 11.00 dB
PL13 0.00 dB
PL14 0.00 dB
PL15 9.17026444 dB
PL16 0.220546011 dB
PL17 0.220546011 dB
NUC3 13C
SI 200.1112000 usec
SFO 100.6283600 MHz
RF 75.4677499 MHz
WDW EM
GB 0
LB 1.00 Hz
GB 0
PC 1.40
```



(4*S*,5*S*)-ethyl 3,3-dicyano-2-(furan-2-yl)-4-hydroxy-5-isopropylcyclohex-1-enecarboxylate: **5o**

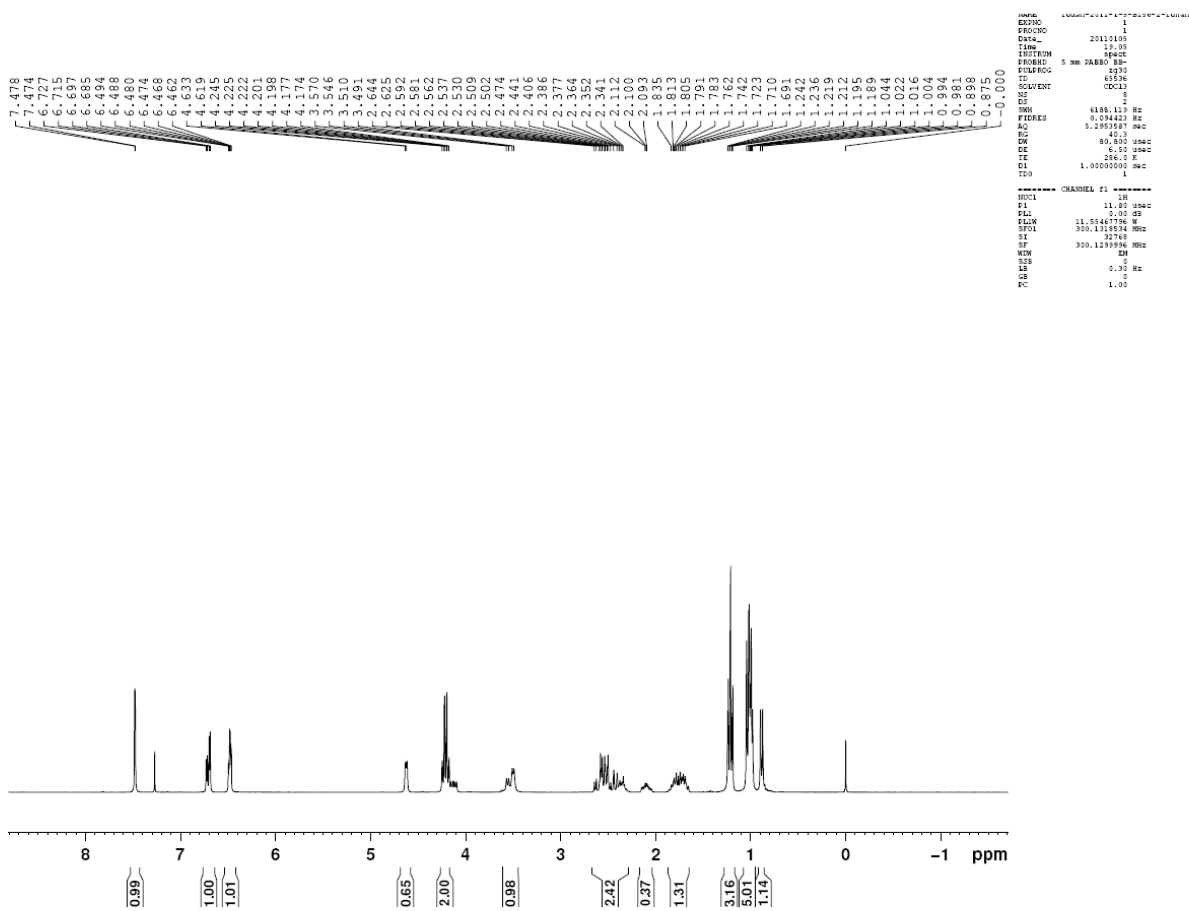

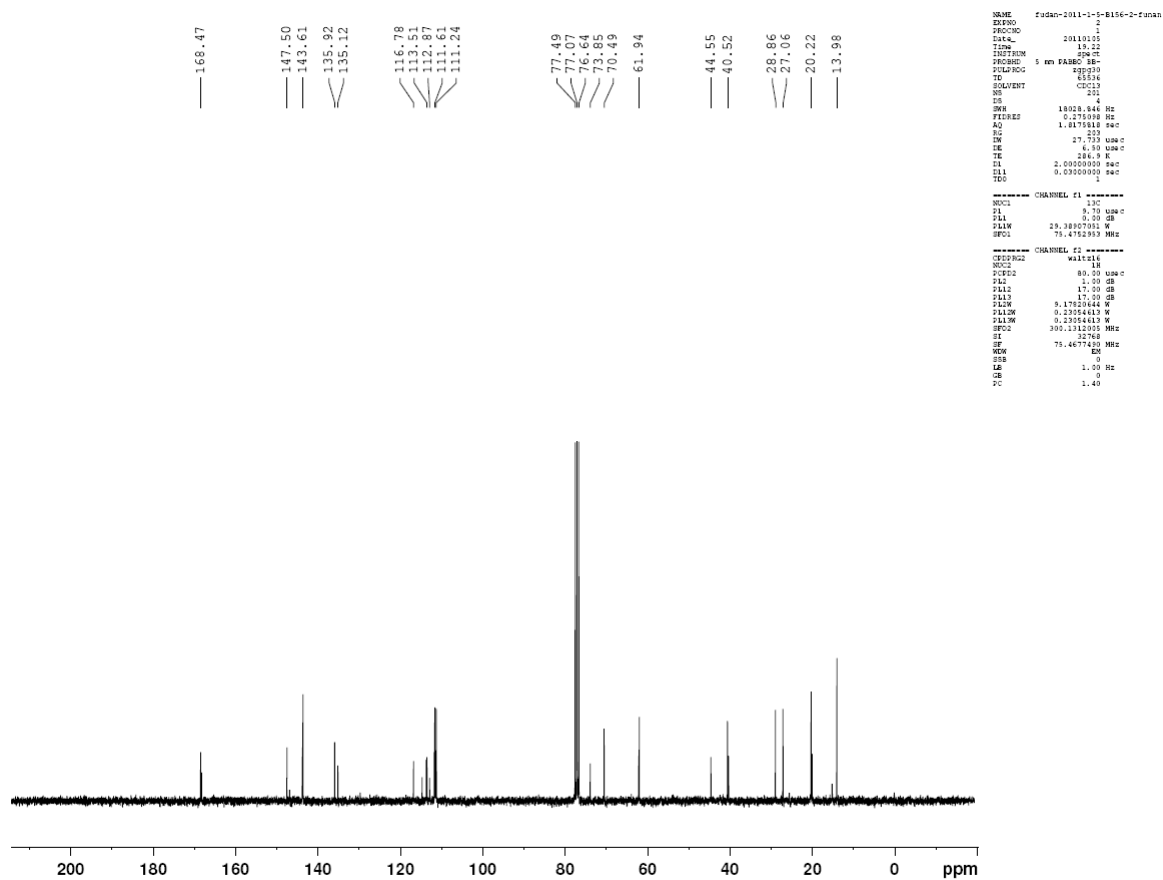

**(4*S*,5*S*)-ethyl 3,3-dicyano-4-hydroxy-5-isopropyl-2-(thiophen-2-yl)cyclohex-1-enecarboxylate:**

**5p**

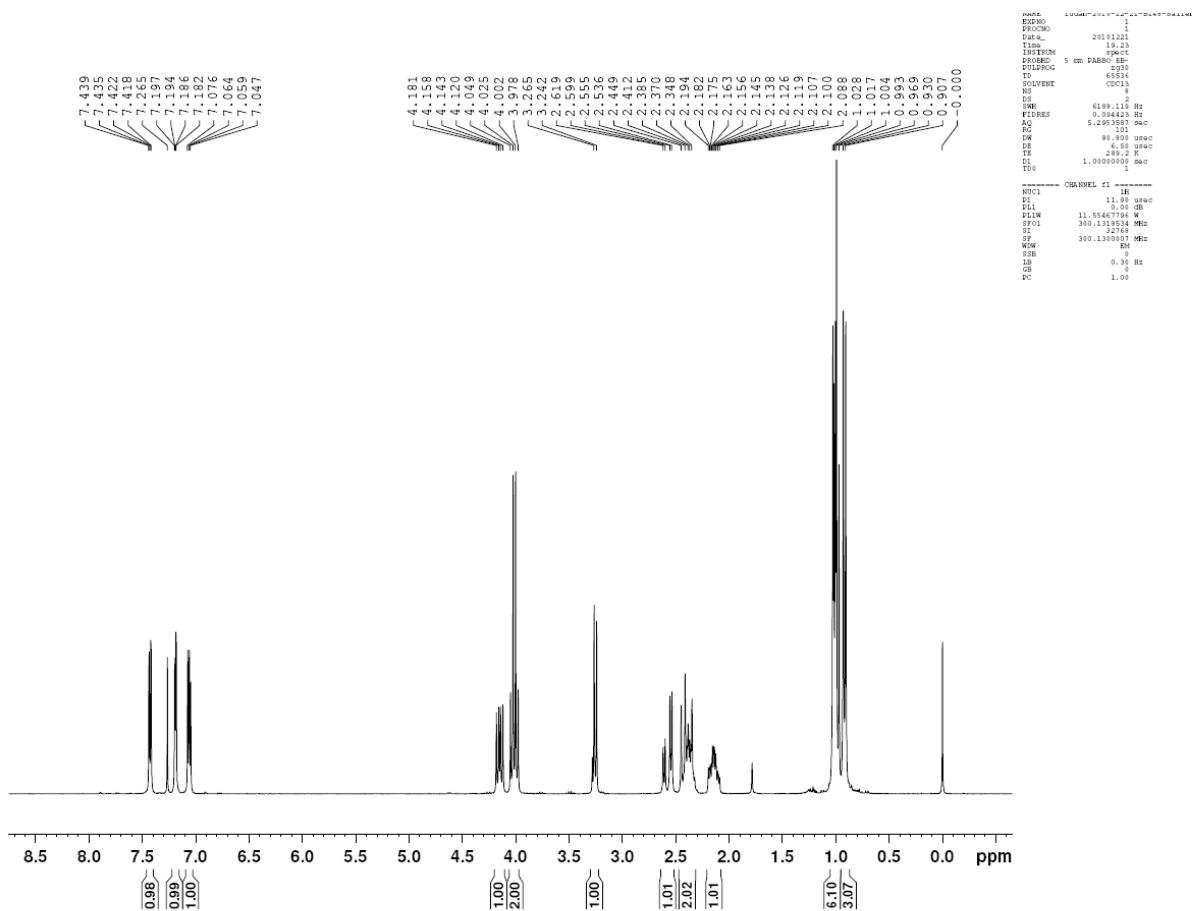

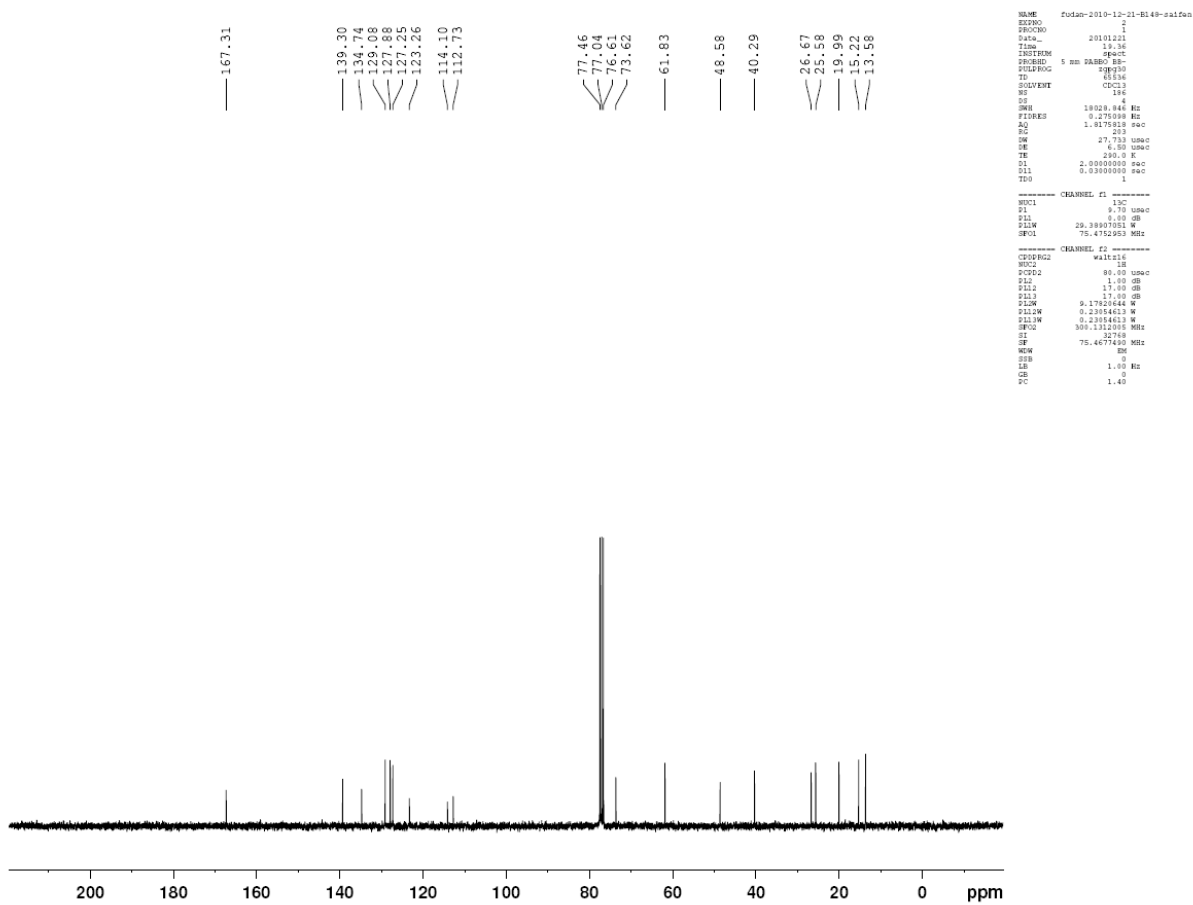

**(4*S*,5*R*)-ethyl 3,3-dicyano-5-ethyl-4-hydroxy-2-(4-methoxyphenyl)cyclohex-1-enecarboxylate:**

**5q**

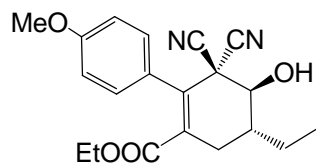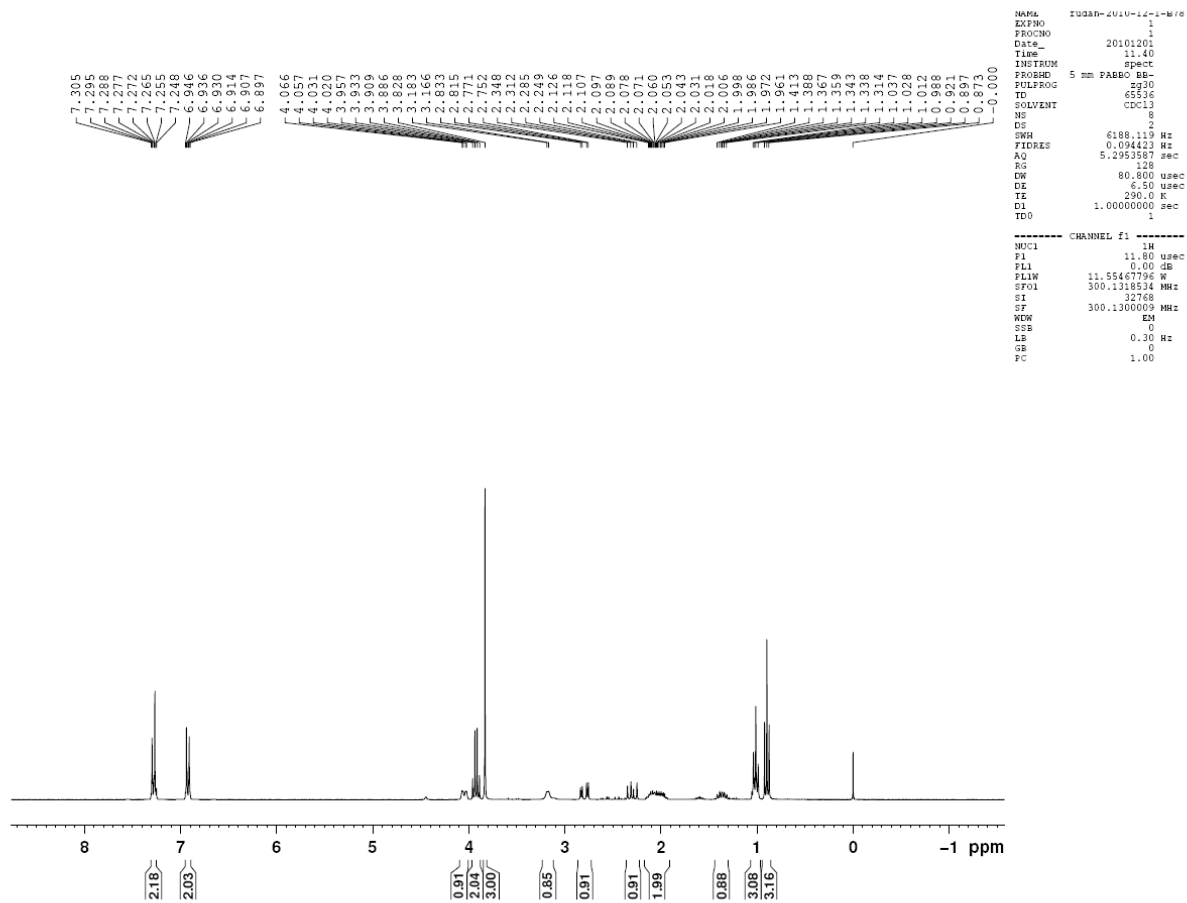

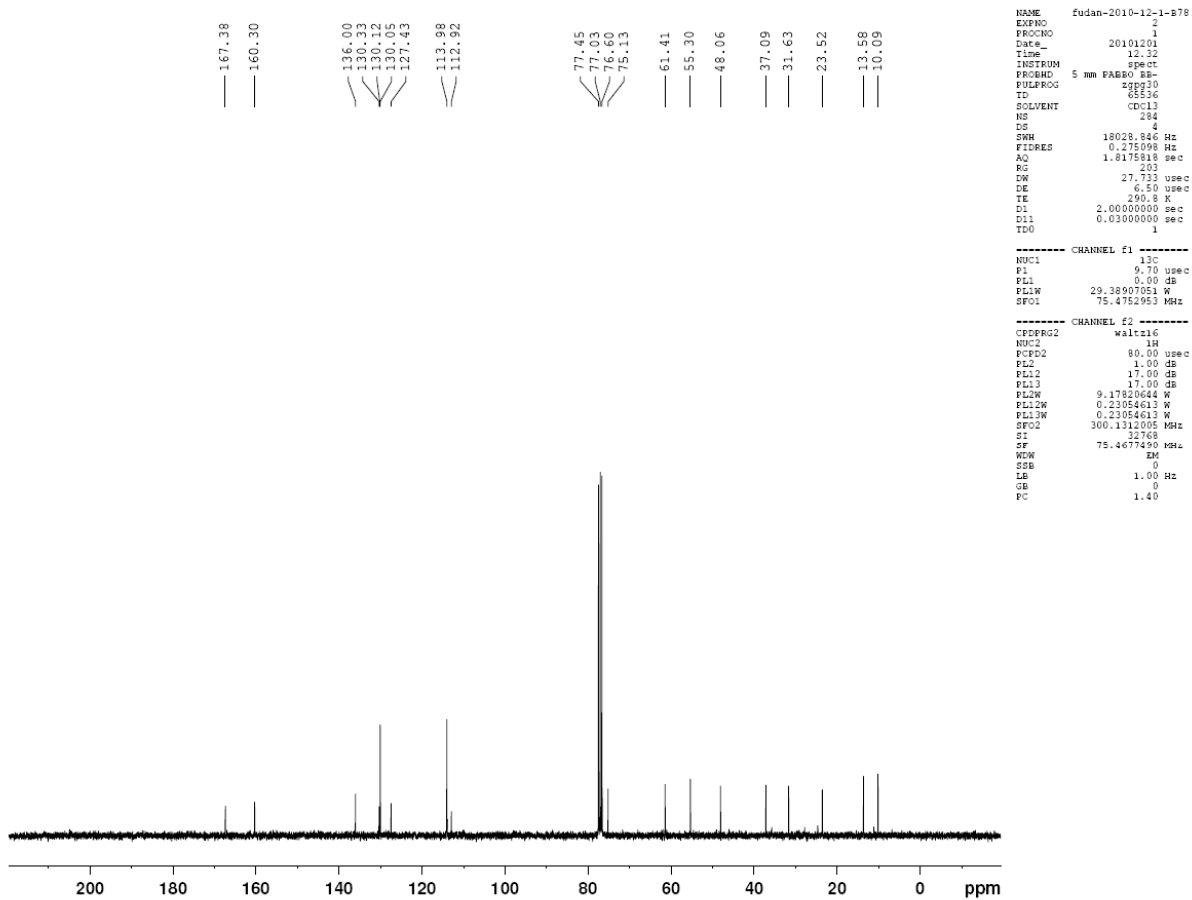

(4*S*,5*S*)-ethyl 3,3-dicyano-4-hydroxy-2-(4-methoxyphenyl)-5-phenylcyclohex-1-enecarboxy

late: 5r

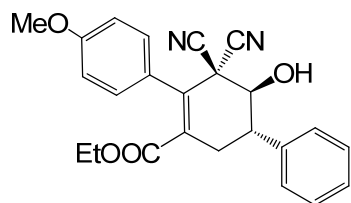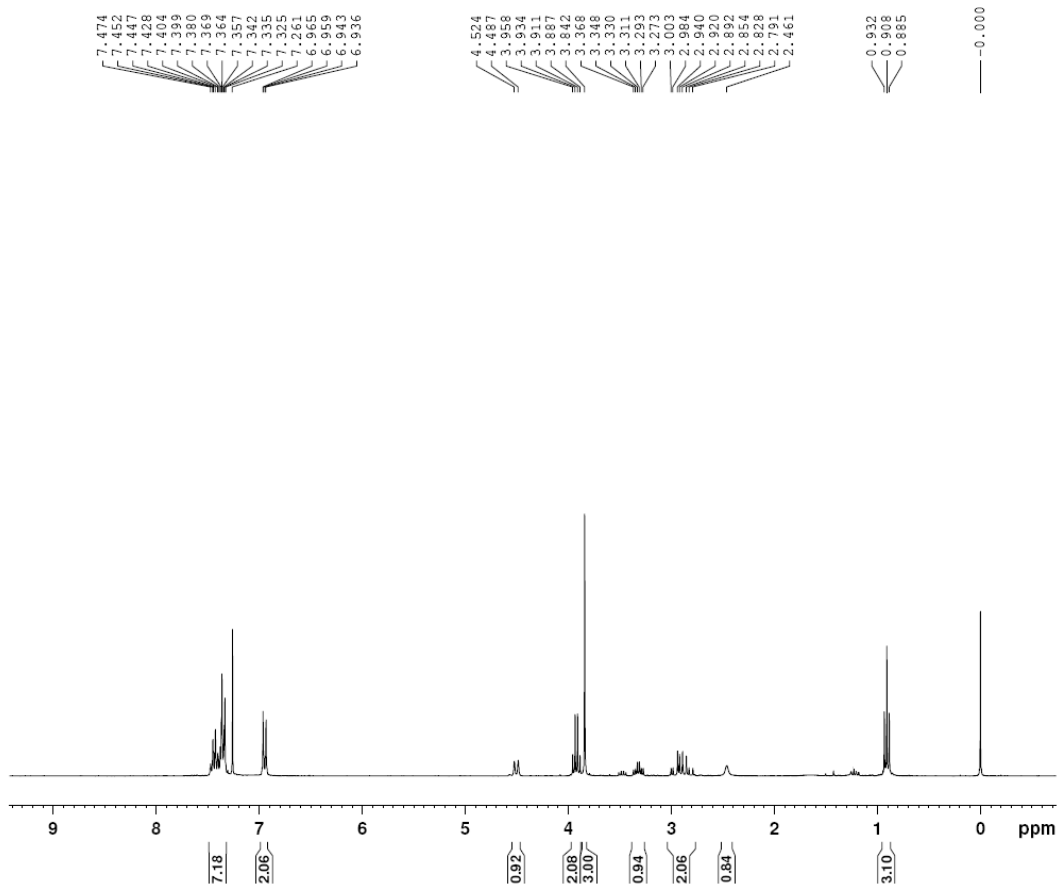

```
NAME: 5r
EXPNO: 1
PROCNO: 1
PROCPS: 2410111
SOLVENT: CDCl3
INSTRUM: spect
PROBHD: 5 mm QNP1H
PULPROG: zgpg30
SOLIDPC:
AQ: 0.05000000
RG: 327.50000000
SI: 65536
SF: 500.13600000
WDW: EM
SSB: 0
LB: 3.00000000
GB: 0
PC: 1.00000000
DC: 0
SFO: 1
F2: 100.626151
F3: 100.626151
F4: 100.626151
F5: 100.626151
F6: 100.626151
F7: 100.626151
F8: 100.626151
F9: 100.626151
F10: 100.626151
F11: 100.626151
F12: 100.626151
F13: 100.626151
F14: 100.626151
F15: 100.626151
F16: 100.626151
F17: 100.626151
F18: 100.626151
F19: 100.626151
F20: 100.626151
F21: 100.626151
F22: 100.626151
F23: 100.626151
F24: 100.626151
F25: 100.626151
F26: 100.626151
F27: 100.626151
F28: 100.626151
F29: 100.626151
F30: 100.626151
F31: 100.626151
F32: 100.626151
F33: 100.626151
F34: 100.626151
F35: 100.626151
F36: 100.626151
F37: 100.626151
F38: 100.626151
F39: 100.626151
F40: 100.626151
F41: 100.626151
F42: 100.626151
F43: 100.626151
F44: 100.626151
F45: 100.626151
F46: 100.626151
F47: 100.626151
F48: 100.626151
F49: 100.626151
F50: 100.626151
F51: 100.626151
F52: 100.626151
F53: 100.626151
F54: 100.626151
F55: 100.626151
F56: 100.626151
F57: 100.626151
F58: 100.626151
F59: 100.626151
F60: 100.626151
F61: 100.626151
F62: 100.626151
F63: 100.626151
F64: 100.626151
F65: 100.626151
F66: 100.626151
F67: 100.626151
F68: 100.626151
F69: 100.626151
F70: 100.626151
F71: 100.626151
F72: 100.626151
F73: 100.626151
F74: 100.626151
F75: 100.626151
F76: 100.626151
F77: 100.626151
F78: 100.626151
F79: 100.626151
F80: 100.626151
F81: 100.626151
F82: 100.626151
F83: 100.626151
F84: 100.626151
F85: 100.626151
F86: 100.626151
F87: 100.626151
F88: 100.626151
F89: 100.626151
F90: 100.626151
F91: 100.626151
F92: 100.626151
F93: 100.626151
F94: 100.626151
F95: 100.626151
F96: 100.626151
F97: 100.626151
F98: 100.626151
F99: 100.626151
F100: 100.626151
```





**(4*S*,5*S*)-methyl 3,3-dicyano-4-hydroxy-5-isopropyl-2-(4-methoxyphenyl)cyclohex-1-enecarboxylate: 5s**

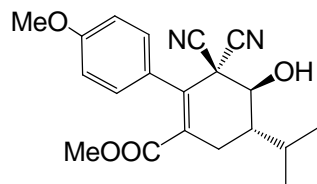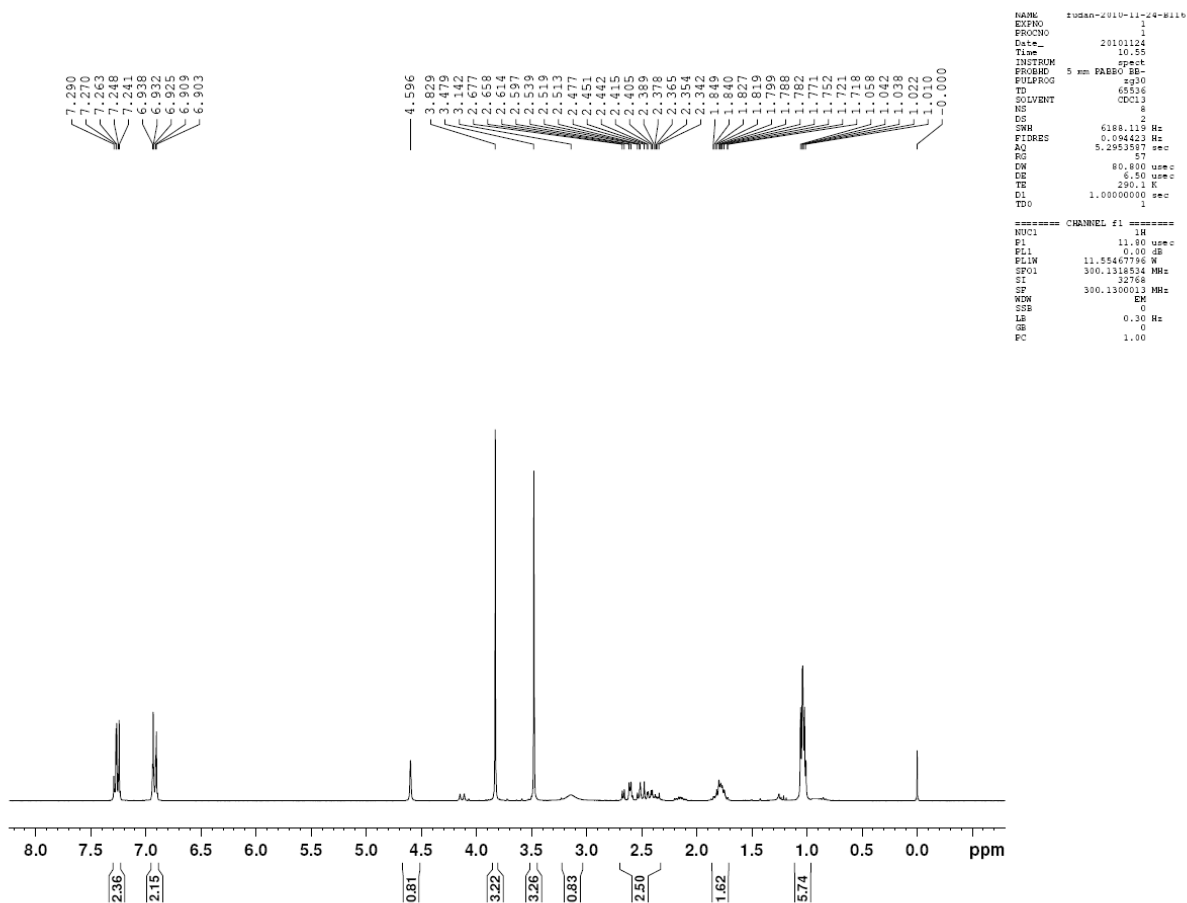

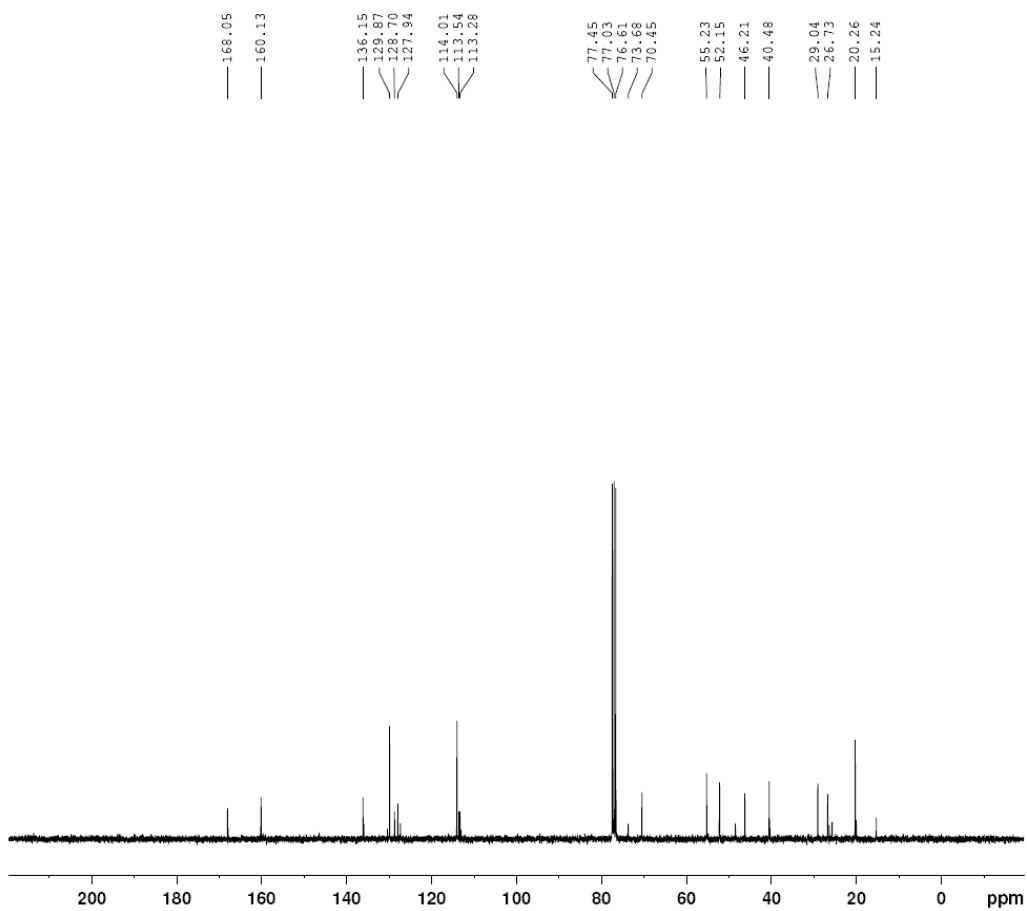

```

NAME      fudan-2010-11-24-B116
EXPNO    1
PROCNO   1
Date_    20101124
Time     11.13
INSTRUM  spect
PROBHD   5 mm PABBO BB-
PULPROG  zgpg30
TD        65536
SOLVENT  CDCl3
NS        324
DS        4
SWH       18028.646 Hz
FIDRES    0.275098 Hz
AQ         1.6175818 sec
RG         203
DN         27.133 usec
DC         6.50 usec
TE        290.2 K
D1         2.00000000 sec
D11        0.03000000 sec
TD0        1

===== CHANNEL f1 =====
NUC1      13C
P1         9.70 usec
PL1        0.00 dB
PL1M      29.3897051 MHz
SF01      75.4752953 MHz

===== CHANNEL f2 =====
CPDPRG2  waltz16
NUC2      1H
PCPD2     80.00 usec
PL2        1.00 dB
PL12      17.00 dB
PL13      17.00 dB
PL2M      9.17820644 MHz
PL12M     0.23054613 MHz
PL13M     0.23054613 MHz
SF02      300.1312005 MHz
SI         32768
SF         75.4677460 MHz
WDW        EM
SSB        0
LB         1.00 Hz
GB         0
PC         1.40
    
```

(4*S*,5*S*)-methyl 2-(4-bromophenyl)-3,3-dicyano-4-hydroxy-5-isopropylcyclohex-1-enecarboxy

late: 5t

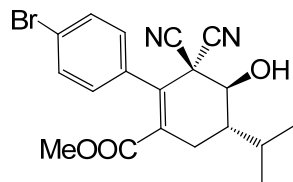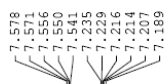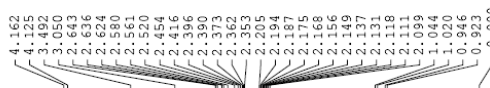

```
NAME: 4-BROMOPHENYL-1-CYANO-4-PROP-1-EN-3-OL
EXPNO: 1
PROCNO: 1
Date_ : 20110110
Time: 13.20
INSTRUM: spect
PROBHD: 5 mm BBOBO
PULPROG: zgpg30
TD: 65536
SOLVENT: CDCl3
NS: 0
DS: 0
SWH: 6180.115 Hz
F2: 50.0164215 MHz
AQ: 5.295205 sec
RG: 320
AQ: 5.295205 sec
SI: 32768
SF: 300.135062 MHz
WDW: EM
SSB: 0
GB: 0
PC: 1.00000000 sec
TE: 300.2 K
===== CHANNEL f1 =====
NUC1: 13C
P1: 11.00 usec
PL1: 0.00 dB
PL12: 11.5547750 MHz
SFO1: 300.135062 MHz
SI: 32768
SF: 300.135062 MHz
WDW: EM
SSB: 0
GB: 0
PC: 0.30 usec
TE: 300.2 K
```

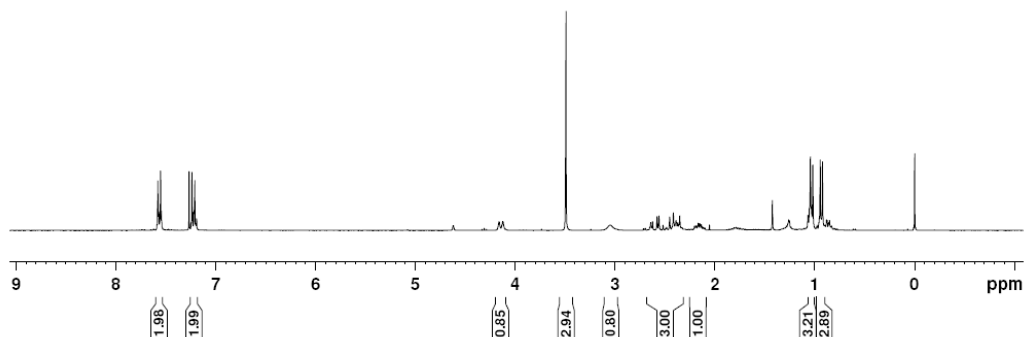

Supplement: c1cc12834e.pdf [file c1cc12834e.pdf]
